# Supplementary material for: Enrichment analyses identify shared associations for 25 quantitative traits in over 600,000 individuals from seven diverse ancestries
Source: PubMed Central journal article supplement — Am J Hum Genet. 2022 Mar 28;109(5):871–84. doi: 10.1016/j.ajhg.2022.03.005 (PMC9118115; doi:10.1016/j.ajhg.2022.03.005), 2022-03-28
Supplement: mmc1.pdf [file mmc1.pdf]

**The American Journal of Human Genetics, Volume 109**

**Supplemental information**

**Enrichment analyses identify shared associations**

**for 25 quantitative traits in over 600,000**

**individuals from seven diverse ancestries**

**Samuel Pattillo Smith, Sahar Shahamatdar, Wei Cheng, Selena Zhang, Joseph Paik, Misa Graff, Christopher Haiman, T.C. Matise, Kari E. North, Ulrike Peters, Eimear Kenny, Chris Gignoux, Genevieve Wojcik, Lorin Crawford, and Sohini Ramachandran**

# S1 Supplemental Note for Smith et al. 2021 - “Enrichment analyses identify shared associations for 25 quantitative traits in over 600,000 individuals from seven diverse ancestries”

## S0.1 SNP-level results for height and C-reactive protein

In [Figure S5A](#) and [Figure S5D](#), we found that, across 25 traits analyzed, height had the greatest number of genome-wide significant SNP-level associations (76,910 unique associations) in at least one ancestry. Of these SNP-level associations, 8.90% (7,377 SNPs) replicate based off of rsID in at least two ancestry cohorts. Height is not the only trait in which the standard GWA SNP-level association test detects associations that replicate extensively across ancestries. In fact, SNP-level associations replicate in each of the 25 continuous traits that we analyze in this study.

We analyzed SNP-level associations with C-reactive protein in six ancestry cohorts: African-American (PAGE), European, South Asian, East Asian, Native Hawaiian, and Hispanic and Latin American cohorts. C-reactive protein is an example of a trait with a sparse and highly conserved genetic architecture across ancestries, as shown in [Figure 2](#). Many SNPs within the *CRP* gene have been previously associated with C-reactive protein plasma levels<sup>[4](#)[3](#)</sup>. In our analysis, rs3091244 is genome-wide significant in only the European ancestry cohort, and has been functionally validated as influencing C-reactive protein levels<sup>[4](#)[5](#)</sup>. The SNP rs3091244 is located in a promoter region slightly upstream of *CRP*, and it has clinical implications for both atrial fibrillation<sup>[6](#)</sup> and lupus erythematosus<sup>[7](#)</sup> (European  $p = 1.54 \times 10^{-116}$ ; East Asian  $p = 1.15 \times 10^{-9}$ ).

We expanded our search for replicated GWA SNP-level association signals across ancestry cohorts by scanning for 1 Mb regions that contained associations to the same phenotype in two or more ancestries—a process often referred to as “clumping”. These windows were centered at every unique genome-wide significant SNP in any ancestry for a given trait (we refer the 1Mb window around the significant SNP as a “clump”, [Figure S5B](#) and [Figure S5E](#)). In addition to the largest number of unique SNP-level associations, height also had the largest proportion of clumps containing a significant SNP-level GWA association signal that replicated in at least two ancestry cohorts (see [Figure S5B](#) and [Figure S5E](#)). The three traits with the greatest proportion of clumps containing SNP-level GWA signals that replicate in multiple ancestry cohorts were height (77.09% of clumps), urate (65.89%), and low density lipoprotein (54.40%).

In addition to the SNP-level associations on chromosome 1 surrounding the *CRP* gene across all six ancestry cohorts (displayed in [Figure 2](#)), there are other regions of the genome that contain significant GWA associations with C-reactive protein that replicate in multiple ancestry cohorts. On chromosome 2, there is a cluster of four SNPs significantly associated with C-reactive protein levels in the European, East Asian, and

32 Hispanic and Latin American ancestry cohorts. Of these, rs1260326 (European  $p = 1.01 \times 10^{-55}$ ; East Asian  
33  $p = 1.70 \times 10^{-9}$ ; Hispanic and Latin American  $p = 1.24 \times 10^{-20}$ ), rs780094 (European  $p = 9.95 \times 10^{-51}$ ;  
34 East Asian  $p = 1.70 \times 10^{-9}$ ; Hispanic and Latin American  $p = 1.14 \times 10^{-16}$ ), and rs6734238 (African-  
35 American (PAGE)  $p = 3.04 \times 10^{-10}$ ; European  $p = 8.38 \times 10^{-34}$ ; South Asian  $p = 2.17 \times 10^{-9}$ ) were  
36 statistically significant in three of the six ancestry cohorts that we analyzed. Each of these three SNPs has  
37 been previously associated with C-reactive protein levels in a European ancestry cohort<sup>[8,10]</sup>. Of these three  
38 SNPs, only one (rs6734238) had previously been replicated in other ancestries (in African-American, and  
39 Hispanic and Latin American cohorts<sup>[11]</sup>).

40 On chromosome 19 there are 23 SNPs that are associated with CRP in the African-American PAGE,  
41 European, and Hispanic and Latin American ancestry cohorts. Two other SNPs are associated with C-  
42 reactive protein in the African-American (PAGE), European, and Hispanic and Latin American cohorts,  
43 as well as the East Asian ancestry cohort. One of these two SNPs, rs7310409 (African-American (PAGE)  
44  $p = 8.57 \times 10^{-9}$ ; European  $p = 3.57 \times 10^{-210}$ ; East Asian  $p = 2.72 \times 10^{-27}$ ; Hispanic and Latin American  
45  $p = 5.35 \times 10^{-29}$ ) located in the HNF1 homeobox A (*HNF1A*) gene, has been previously associated with  
46 C-reactive protein levels in only a European ancestry cohort<sup>[9,10]</sup>. Three additional significant SNPs in our  
47 analysis have been previously associated with European ancestry cohorts in previous studies, including:  
48 rs1169310<sup>[11]</sup> (European  $p = 1.52 \times 10^{-172}$ ; East Asian  $p = 1.28 \times 10^{-18}$ ; Hispanic and Latin American  
49  $p = 1.17 \times 10^{-27}$ ), rs1183910<sup>[8,12]</sup> (European  $p = 5.50 \times 10^{-177}$ ; East Asian  $p = 3.16 \times 10^{-29}$ ; Hispanic and  
50 Latin American  $p = 7.47 \times 10^{-29}$ ), and rs7953249<sup>[13]</sup> (European  $p = 1.19 \times 10^{-177}$ ; East Asian  $p = 1.10 \times 10^{-19}$ ;  
51 Hispanic and Latin American  $p = 4.80 \times 10^{-29}$ ). Two SNPs, rs2259816 (European  $p = 2.77 \times 10^{-172}$ ;  
52 East Asian  $p = 9.33 \times 10^{-18}$ ; Hispanic and Latin American  $p = 1.90 \times 10^{-27}$ ) and rs7979473 (African  
53  $p = 1.49 \times 10^{-9}$ ; East Asian  $p = 6.06 \times 10^{-29}$ ; Hispanic and Latin American  $p = 1.56 \times 10^{-30}$ ), have been  
54 previously associated with C-reactive protein in both African-American and Hispanic and Latin American  
55 ancestry cohorts<sup>[11]</sup>. There is one final group of three SNPs associated with C-reactive protein in the African-  
56 American (PAGE), European, East Asian, and Hispanic and Latin American ancestry cohorts on chromosome  
57 19. One of them, rs4420638 (East Asian  $p = 9.93 \times 10^{-29}$ ; Hispanic and Latin American  $p = 2.03 \times 10^{-30}$ ),  
58 has been previously associated in a European ancestry cohort<sup>[8,10,12]</sup>. These four regions indicate a highly  
59 conserved SNP-level architecture of C-reactive protein across six ancestry cohorts. Interestingly, we were  
60 unable to replicate associations with C-reactive protein across ancestries at the gene or pathway levels.

## 61 Gene and pathway association results

62 Three genes, *GP6*, *RDH13*, and *AGPAT5*, were significantly associated with platelet count (PLC) in the  
63 African-American (PAGE) ancestry cohort and the East Asian ancestry cohort Figure S13. Of these, no

64 significant SNPs in glycoprotein VI platelet (*GP6*) have been reported in the GWAS catalog for either  
65 ancestry cohort. However, a single SNP within *GP6*, rs1613662, has previously been associated with mean  
66 platelet volume in a GWA study analyzing a European ancestry cohort<sup>14</sup>. *GP6* plays a critical role in  
67 platelet aggregation, and mutations have been previously associated with fetal loss<sup>15</sup>. Retinol dehydrogenase  
68 13 (*RDH13*) has no reported GWAS catalog associations with platelet count, but is within 60kb of a SNP  
69 significantly associated with platelet aggregation<sup>16</sup>. Of the three genes significantly associated with PLC  
70 in both the European and AIAN cohorts, 1-Acylglycerol-3-Phosphate O-Acyltransferase 5 (*AGPAT5*) is a  
71 member of a gene family known to play a role in immunity and inflammation response<sup>17</sup>.

72 Alcohol dehydrogenase 2 (*ALDH2*) has additionally been associated with hypertension in an elderly  
73 Japanese cohort<sup>18</sup>. A member of the RAS oncogene family (*RAB8A*) has been shown to play a role in  
74 the inhibition of inflammatory response. In contrast, cut like homeobox 2 *CUX2* contains a significantly  
75 associated SNP in the array used in this study for the East Asian ancestry cohort, but it has no previous  
76 associations in a European ancestry cohort. However, *CUX2* is significantly associated at the gene-level in  
77 both the European and East Asian ancestry cohorts. Although not reported as being associated with PLC  
78 in the GWAS Catalog, a single SNP, rs61745424 which encodes a missense mutation, has been previously  
79 identified as being related to the trait<sup>19</sup>. The gene- $\epsilon$  association statistics for the seven genes significantly  
80 associated with PLC are available in [Table S24](#).

81 Finally, a single gene, acyl-CoA dehydrogenase family member 10 (*ACAD10*) associated in our gene-level  
82 analysis of PLC, was significant in both the European and East Asian ancestry cohorts (European gene-  
83  $\epsilon p = 1.47 \times 10^{-10}$ ; East Asian gene- $\epsilon p = 2.00 \times 10^{-10}$ ) but contained no previous associations in the GWAS  
84 catalog. The African-American and Hispanic and Latin American ancestry cohorts analyzed in Qayyum  
85 et al.<sup>20</sup> both contain SNPs within *ACAD10* that are significantly associated with PLC.

86 In our analysis of triglyceride levels in six ancestry cohorts (African-American (PAGE), European, East  
87 Asian, South Asian, Hispanic and Latin American, and Native Hawaiian), we identified shared genetic  
88 architecture at the SNP, gene, and subnetwork level. Replicated SNPs and genes between the six ancestry  
89 cohorts are shown in [Figure S15](#) [Figure S16](#). We focus our discussion of results at the network level in  
90 the European, East Asian, and Native Hawaiian ancestry cohorts (Figure [3](#)). In the European and East  
91 Asian ancestry cohorts, we identified 55 shared genome-wide significant associations at the gene-level. Of  
92 these results, eight genes lie in the same significantly mutated subnetwork (Hierarchical HotNet  $p < 10^{-3}$ )  
93 when analyzing each ancestry cohort independently. Five of those eight genes belong to the apolipoprotein  
94 family of genes, including: apolipoprotein A1 (*APOA1*), apolipoprotein A4 (*APOA4*), apolipoprotein A5  
95 (*APOA5*), apolipoprotein C3 (*APOC3*), apolipoprotein E (*APOE*). Specifically, the apolipoprotein play a  
96 central role in lipoprotein biosynthesis and transport. All of these genes contain SNPs previously associated

97 with triglyceride levels in a European ancestry cohort<sup>21,26</sup>. All five genes also contain SNPs previously  
98 associated with triglyceride levels in non-European ancestry cohorts. Specifically, *APOA1*, *APOC3*, and  
99 *APOE* each contain SNPs previously associated with triglyceride levels in African-American and Hispanic  
100 and Latin American ancestry cohorts<sup>21,22</sup>. *APOA5* has previously been associated to triglyceride levels in  
101 an East Asian, African-American, and Hispanic and Latin American ancestry cohorts<sup>24,27</sup>.

102 The other three genes that were significantly associated with triglyceride levels in the European and East  
103 Asian ancestry cohorts are members of the largest significantly mutated subnetwork including phospholipid  
104 transfer protein (*PLTP*; European gene- $\epsilon$   $p = 4.29 \times 10^{-9}$ ; East Asian gene- $\epsilon$   $p = 6.66 \times 10^{-15}$ ), lipoprotein  
105 lipase (*LPL*; European gene- $\epsilon$   $p = 4.08 \times 10^{-13}$ ; East Asian gene- $\epsilon$   $p = 1.00 \times 10^{-20}$ ), and angiopoietin like 3  
106 (*ANGPTL3*; European gene- $\epsilon$   $p = 8.86 \times 10^{-8}$ ; East Asian gene- $\epsilon$   $p = 1.00 \times 10^{-20}$ ). *PLTP* has previously  
107 been associated with triglyceride levels in European, African-American, and Hispanic and Latin American  
108 ancestry cohorts<sup>21,22,24,28,32</sup>. *LPL* is one of the most well-studied genes in the regulation of triglyceride levels.  
109 It has previously been associated with triglyceride levels in European ancestry cohorts<sup>21,26,28,32,32,45</sup>, East  
110 Asian ancestry cohorts<sup>27,46</sup>, and African ancestry cohorts as well as Hispanic and Latin American ancestry  
111 cohorts<sup>21,24,28,29,42,44,45,47,48</sup>. The final gene that was genome-wide significant in both the European and  
112 East Asian ancestry cohorts, *ANGPTL3*, has no previous associations in the GWAS catalog and presents  
113 a novel candidate gene within the network. While not significant in any gene-level analysis, *ANGPTL4*  
114 (European gene- $\epsilon$   $p = 1.00 \times 10^{-20}$ ; East Asian gene- $\epsilon$   $p = 9.99 \times 10^{-1}$ ) is from the same family is present  
115 in the largest subnetwork in the European cohort and also has also been previously identified as having  
116 associations in European, African, and Hispanic and Latin American ancestry cohorts<sup>24,28,42,44,45,49</sup>.

117 In our analysis of the European ancestry cohort from the UK Biobank, we additionally identified a set of  
118 eight genes that are connected to the core network discussed above. One of these genes is *ANGPTL4*, which  
119 we discussed above. Five of these genes were significant at the gene-level in the European ancestry cohort,  
120 including four apolipoprotein genes (*APOC1*; European gene- $\epsilon$   $p = 1.67 \times 10^{-16}$ , *APOC2*; European gene-  
121  $\epsilon$   $p = 3.57 \times 10^{-13}$ , *APOC4*; European gene- $\epsilon$   $p = 3.72 \times 10^{-13}$ , and *APOB*; European gene- $\epsilon$   $p = 1.00 \times 10^{-20}$ )  
122 and lipase maturation factor 1 (*LMF1*; European gene- $\epsilon$   $p = 8.03 \times 10^{-7}$ ). Each of these genes have been  
123 previously associated with triglyceride levels in a European ancestry cohort<sup>24</sup>. Additional associations  
124 were also found in that same study which conducted a meta-analysis of European, African-American, and  
125 Hispanic and Latin American ancestry cohorts. The final two genes included in the significantly mutated  
126 subnetwork of the European ancestral cohort, *APOL1* and *HBA1*, were not were not identified as genome-  
127 wide significant by gene- $\epsilon$  and have no previous SNP-level associations with triglyceride levels in the GWAS  
128 Catalog. Interestingly, both *APOL1* (Native Hawaiian gene- $\epsilon$   $p = 8.89 \times 10^{-11}$ ) and *HBA1* (Native Hawaiian  
129 gene- $\epsilon$   $p = 2.46 \times 10^{-10}$ ) were both identified as genome-wide significant by gene- $\epsilon$  in our analysis of the Native

130 Hawaiian ancestry cohort and the interaction between them was identified in our Hierarchical HotNet<sup>50</sup>  
131 analysis as present in both the European and Native Hawaiian ancestry cohorts.

132 In addition to *APOL1* and *HBA1*, six more genes are connected to the core network of genes that overlap  
133 in the East Asian and European significantly mutated subnetworks. Of these, both *HBA2* and *B4GALT3* are  
134 significant at the gene-level in the Native Hawaiian ancestry cohort alone. They are each connected to genes  
135 identified in both the European and Native Hawaiian ancestry cohorts as members of the largest significantly  
136 mutated subnetwork. The final three genes include kallikrein related peptidase 8 (*KLK8*), pancreatic lipase  
137 *PNLIP*, and wnt family member 4 (*WNT4*) which were not significant at the gene-level and did not contain  
138 previous SNP-level associations in the GWAS catalog.

139 Three of the genes within the network identified in the East Asian ancestry cohort contain previously  
140 associated SNPs in both European and non-European ancestry cohorts, including: cholesteryl ester transfer  
141 protein (*CETP*), proprotein convertase subtilisin/kexin type 6 (*PCSK6*), and proprotein convertase subtil-  
142 isin/kexin type 7 (*PCSK7*)<sup>2129</sup>. The final three genes in the significantly mutated subnetwork identified in  
143 the East Asian ancestry cohort were not significant at the gene-level and do not contain previously associated  
144 SNPs in the GWAS catalog in any ancestral cohort. Lecithin-cholesterol acyltransferase (*LCAT*) is involved  
145 in cholesterol biosynthesis and apolipoprotein F (*APOF*) encodes one of the minor apolipoprotein genes  
146 present in plasma. Finally, tyrosine-protein kinase receptor 3 (*TYRO3*) plays a role in ligand recognition  
147 and cell metabolism<sup>51</sup>. The gene- $\varepsilon$   $p$ -values in each ancestry cohort for each of the 28 genes discussed here  
148 are shown in [Table S26](#)

## 149 Supplemental Figures

### UK Biobank Studies from 2012 to 2020

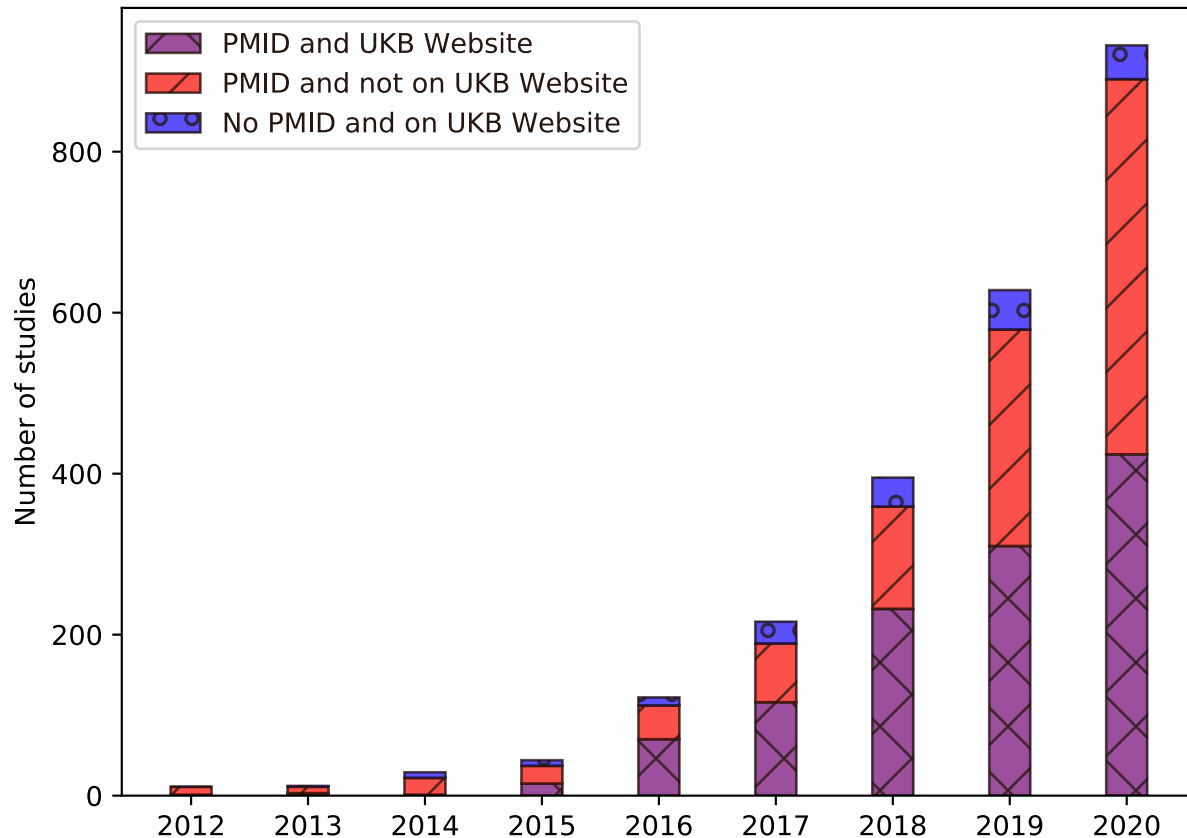

**Figure S1: Number of publications we identified using UK Biobank data from 2012 to 2020.** Studies identified using PMIDs as described in the Supplemental Information. Studies that are displayed on the UK Biobank website (<https://www.ukbiobank.ac.uk/>) and identified on PubMed are shown in purple. Studies listed on the UK Biobank website but do not have a PMID are shown in blue, and studies only identified using PubMed but not listed on the UK Biobank website are shown in red. The protocols for identifying studies both on PubMed and the UK Biobank website are detailed in the Supplemental Information. Data from both the UK Biobank website and PubMed were accessed on January 12, 2021.

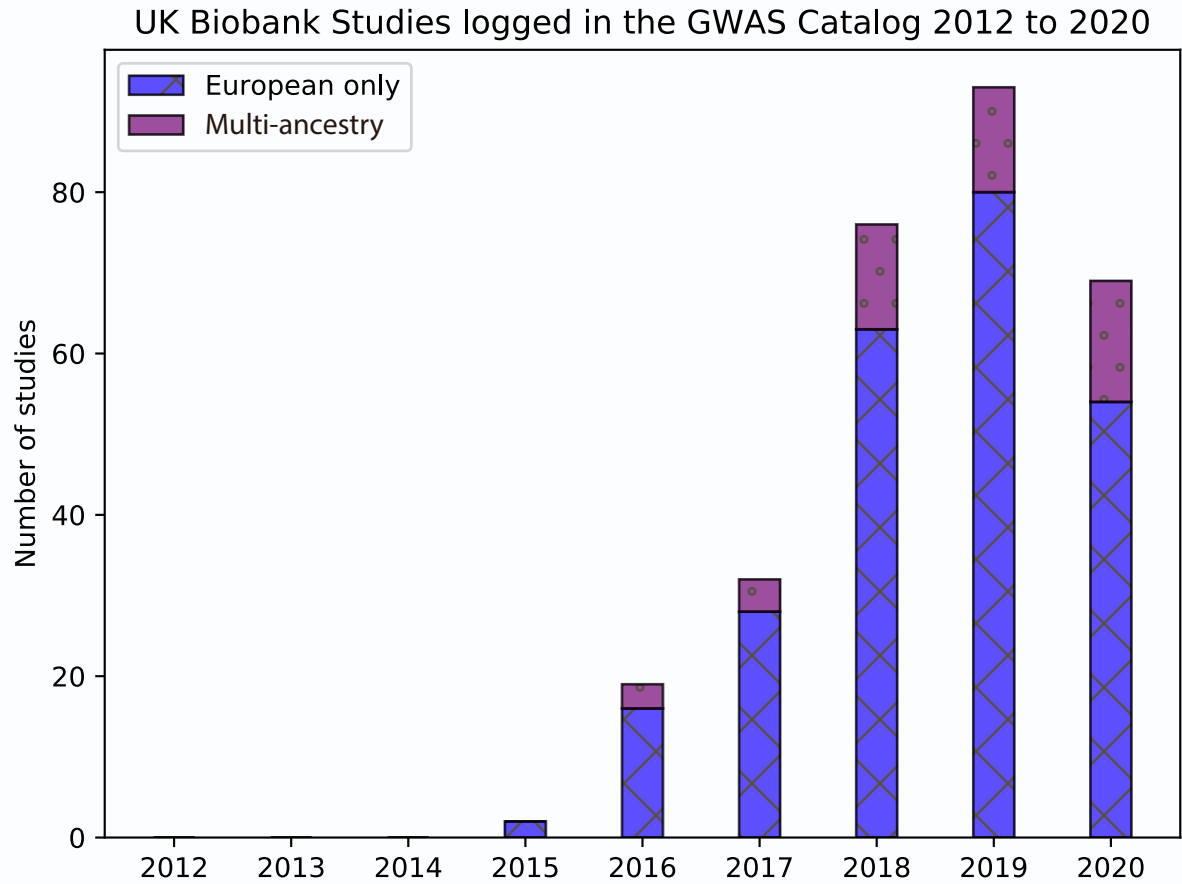

**Figure S2: Number of studies published using UK Biobank data from 2012 to 2020 that have available metadata in the GWAS Catalog.** Our protocols for identifying studies from the GWAS Catalog are detailed in the Supplemental Information. Multi-ancestry studies are shown in purple and include those that list samples of more than one ancestral group in the GWAS catalog (as defined according to the protocol using Popejoy and Fullerton<sup>52</sup>, available on the GitHub page [https://github.com/ramachandran-lab/redefining\\_replication](https://github.com/ramachandran-lab/redefining_replication)). Studies that only list samples of European ancestry in the GWAS catalog are shown in blue. Every multi-ancestry analysis includes samples of European ancestry and of at least one other ancestry. GWAS Catalog data was accessed on January 10, 2021 from the website <https://www.ebi.ac.uk/gwas/docs/file-downloads> using the final release file of 2020 (see file named `gwas_catalog.v1.0.2-associations_e100_r2020-12-15.tsv`).



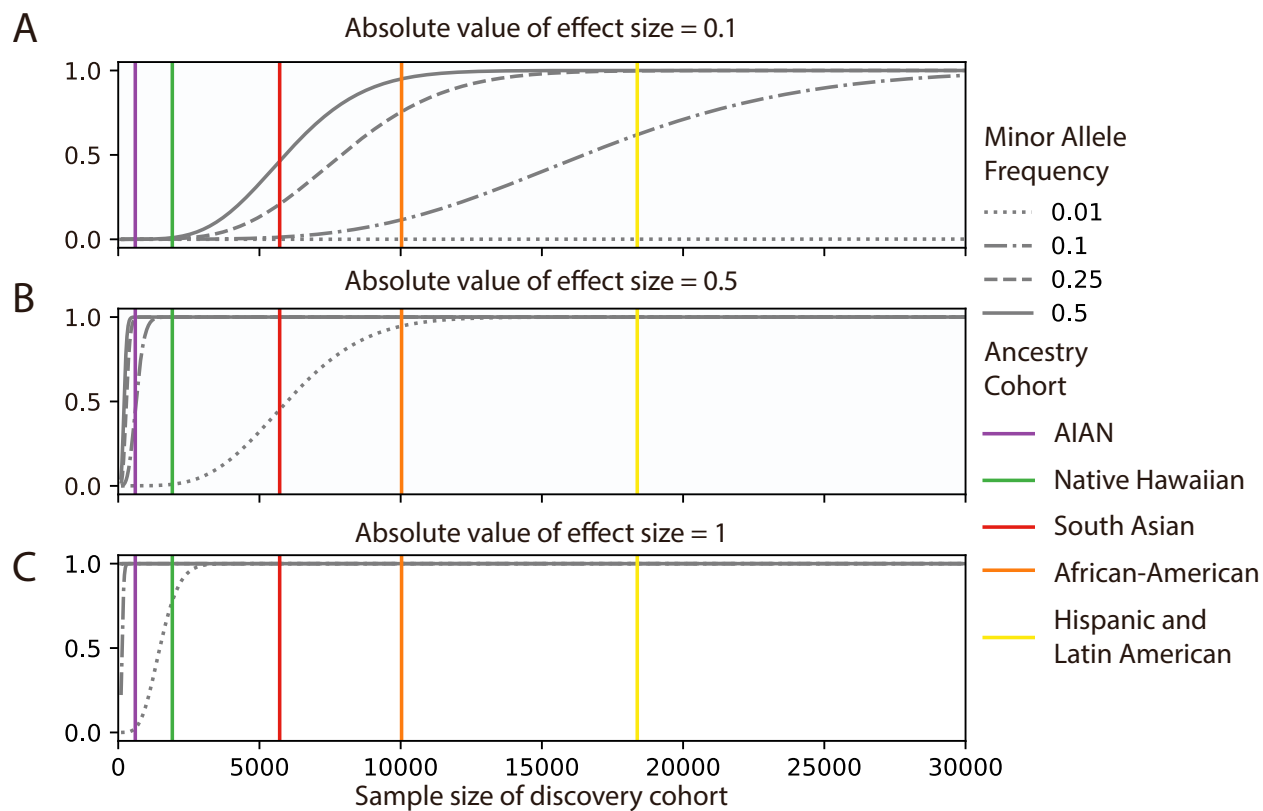

**Figure S3: Power calculations for the standard GWA framework as a function of sample sizes using a range of effect sizes and minor allele frequencies. A.** For an absolute value of effect size equal to 0.1 we performed power calculations for the standard GWA framework for cohorts with sample sizes of up to 30,000 individuals. Similar plots for absolute value of effect size set to 0.5 and 1 are shown in **B.** and **C.**, respectively. A full description of the power calculations is given in the Materials and Methods.

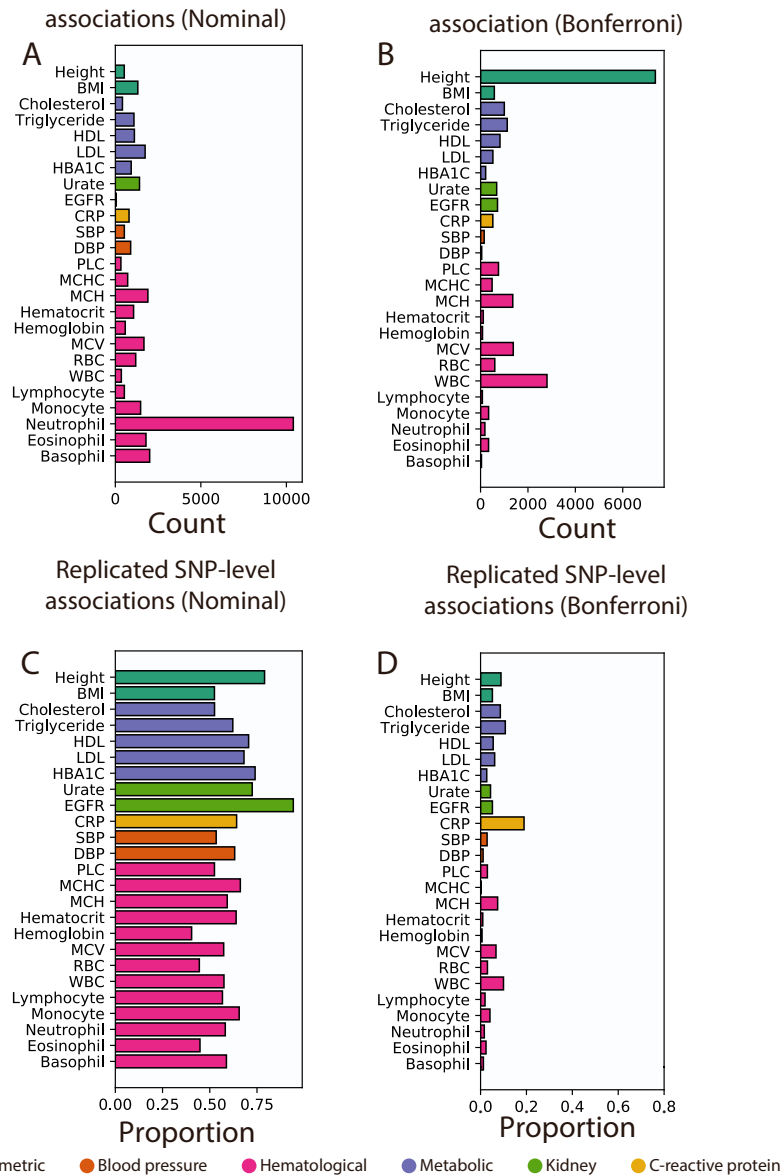

**Figure S4: Summaries of replicated SNP-level associations when using two-stage GWA study design a nominal significance threshold.** (A) Number and (C) proportion of nominally significant SNPs associated with a phenotype in the European ancestry cohort that were replicated in at least one other ancestry cohorts using a nominal  $p$ -value threshold calculated as 0.05 divided by the number of SNPs significantly associated with that trait in the European ancestry cohort. The corresponding thresholds for each trait are listed in [Table S12](#). For ease of comparison, (B) number and (D) proportion of Bonferroni significant SNP-level associations that replicate among ancestry cohorts using the ancestry-trait Bonferroni-correction thresholds shown [Table S11](#). Expansion of three letter trait codes are given in [Table S2](#). Expansion of three letter trait codes are given in [Table S2](#).

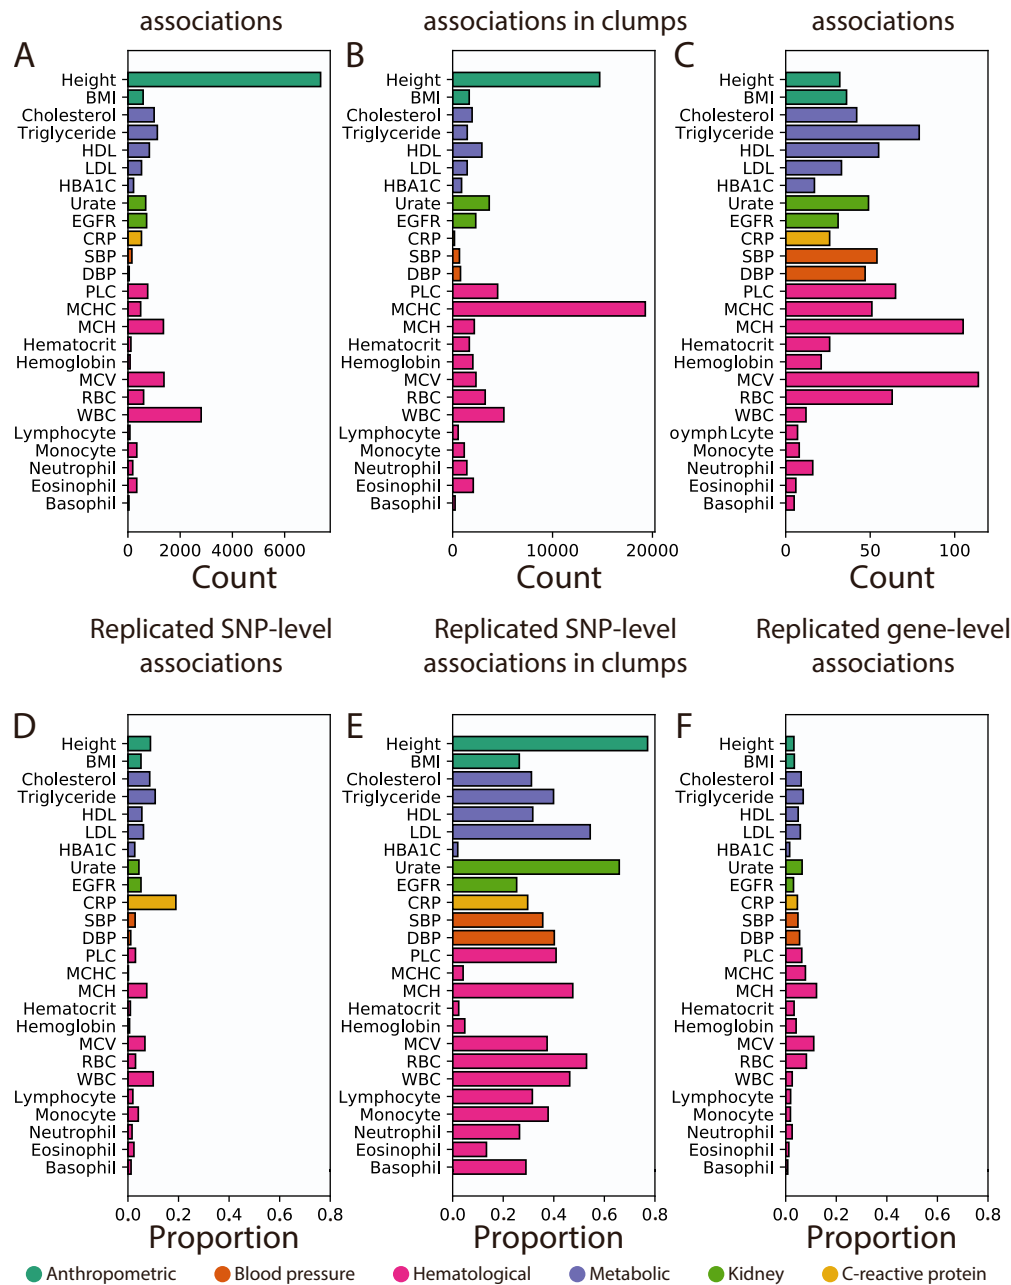

**Figure S5: Summaries of replicated associations at multiple genomic scales among ancestry cohorts for all 25 traits analyzed using Bonferroni-corrected thresholds.** Expansion of three letter trait codes are given in [Table S2](#). (A) Number and (D) proportion of genome-wide significant SNPs associated with a phenotype in at least one ancestry cohort that were replicated in at least two ancestry cohorts. In all 25 traits, genome-wide significant SNPs replicate in at least two ancestry cohorts. Height contains over 7,000 replicated SNPs among the seven ancestry cohorts analyzed, illustrating its highly polygenic architecture. For many traits across all categories, with the exception of other biochemical (i.e., CRP), the replication rate of genes is higher in gene-level associations than at the SNP-level. (B) Number and (E) proportion of 1Mb windows, or “clumps”, that contain at least one genome-wide significant SNP-level associations for a given phenotype in at least two ancestry cohorts. (C) Number and (F) proportion of genome-wide significant gene-level associations that replicate among ancestry cohorts. Replicated associations in hematological are common at the gene-level in hematological and metabolic traits. For instance, in three of the four cohorts with mean corpuscular hemoglobin (MCH) measurements *HBA1* and *HBA2* were identified as significant associated with MCH in the African, European, and East Asian ancestry cohorts [Table S3](#). The denominator of the proportion is calculated as the total number of unique SNPs, clumps, or genes that are significantly associated with a trait in at least on ancestral cohort. Note that D and F correspond to Figure [1A](#) and B, with an altered x-axis upper limit of 0.8 in this figure.

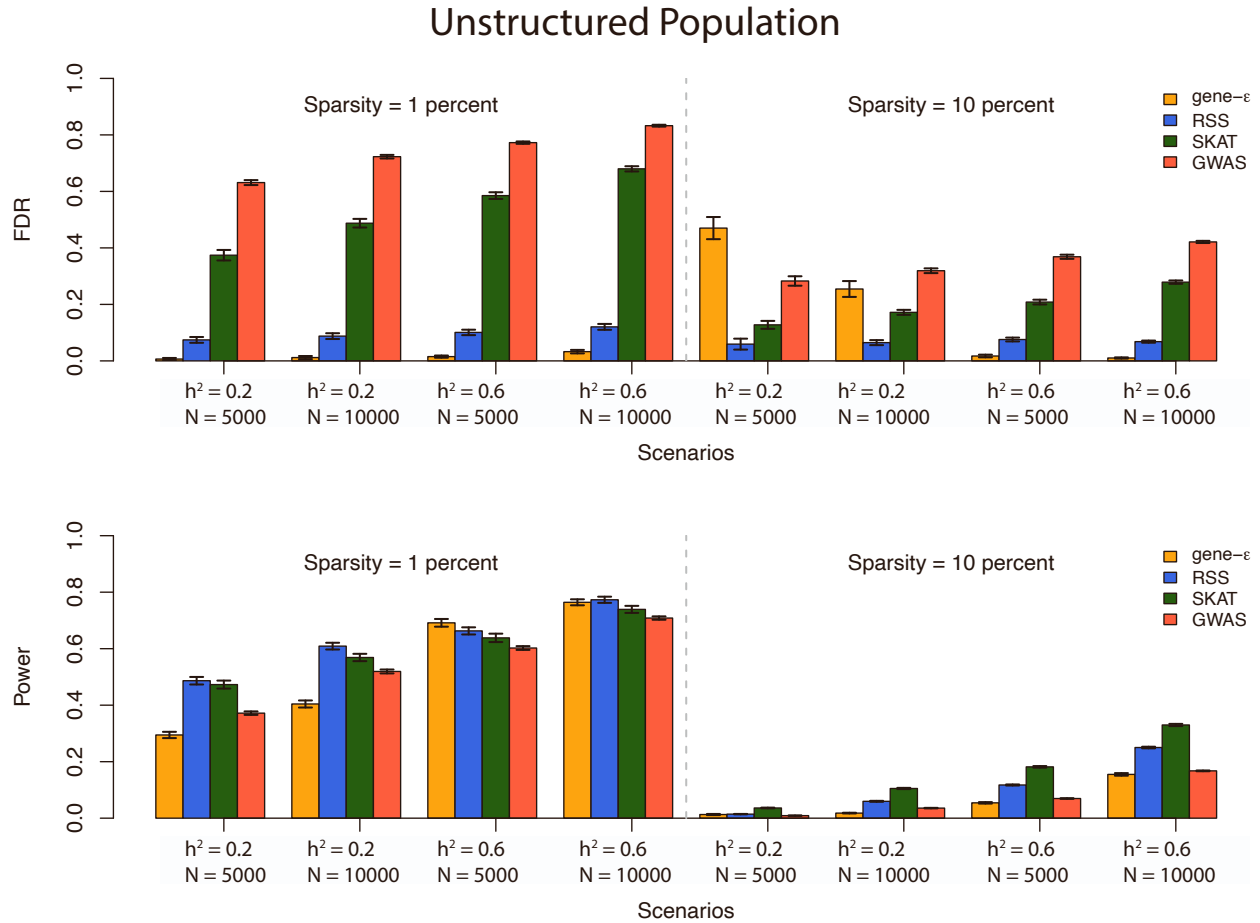

**Figure S6: gene- $\epsilon$  outperforms and controls false discovery rate (FDR) better than other association methods in simulations with varying heritability and sample size.** Simulations were designed to assess gene versus SNP-level association false discovery rate (FDR) and power in an unstructured population as described by the protocols in the Supplemental Information. The top and bottom panels show the FDR and power of four different association methods on 100 simulated datasets, respectively. We compared performance of three gene-level association test methods (gene- $\epsilon$ <sup>53</sup>, RSS<sup>54</sup>, SKAT<sup>55</sup>) with outputs from the standard GWA association test under different simulation parameters (sample size  $N$ , narrow-sense heritability  $h^2$ , and sparsity). We define sparsity as the proportion of SNPs that are ground-truth causal. Standard errors across the simulated replicates are shown using black whisker plots. Simulation protocol is described in the Supplemental Information.

## Structured Population

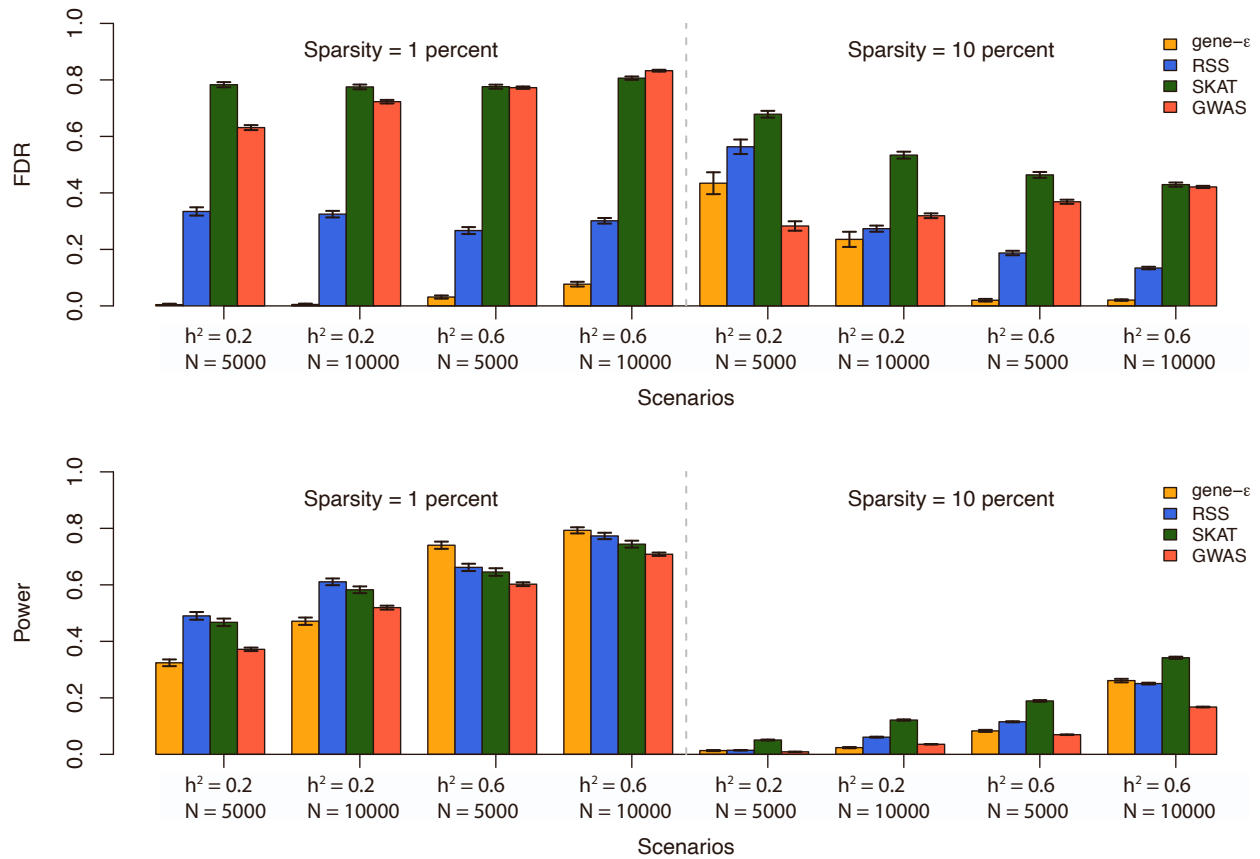

**Figure S7: gene- $\epsilon$  outperforms and controls false discovery rate (FDR) better than other association methods in simulations with varying heritability and sample size.** Simulations are designed to assess gene versus SNP-level association false discovery rate (FDR) and power in an structured population as described by the protocols in the Supplemental Information. The top and bottom panels show the FDR and power of four different association methods on 100 simulated datasets, respectively. We compared performance of three gene-level association test methods (gene- $\epsilon$ <sup>53</sup>, RSS<sup>54</sup>, SKAT<sup>55</sup>) with outputs from the standard GWA association test under different simulation parameters (sample size  $N$ , narrow-sense heritability  $h^2$ , and sparsity). We define sparsity as the proportion of SNPs that are designated to be causal. Standard errors across the simulated replicates are shown using black whisker plots.

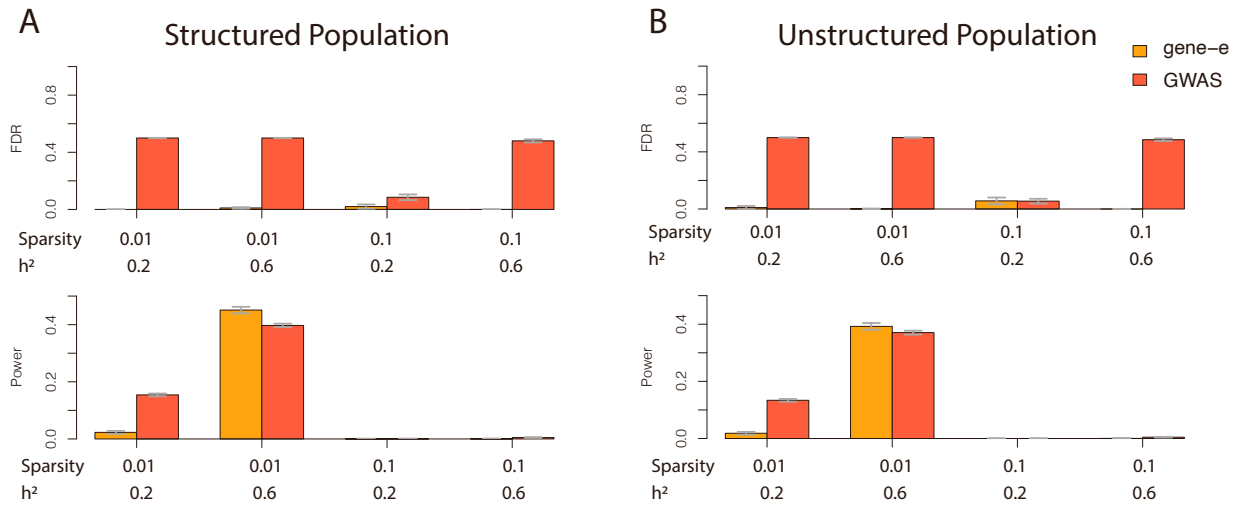

**Figure S8: gene- $\epsilon$  outperforms and controls false discovery rate (FDR) better than the standard GWA framework in simulations with varying heritability and sparsity.** All simulations were done with 2,000 individuals to test the power of gene- $\epsilon$  to detect associations in a small cohort. The FDR (top) and power (bottom) for each parameter set are calculated across 100 simulated replicates. A. Results from simulated populations where population structure is present. B. Results from simulated populations when population structure is not present. Mean power and false discovery rate, as well as corresponding standard errors, are shown in [Table S23](#) for clarity.

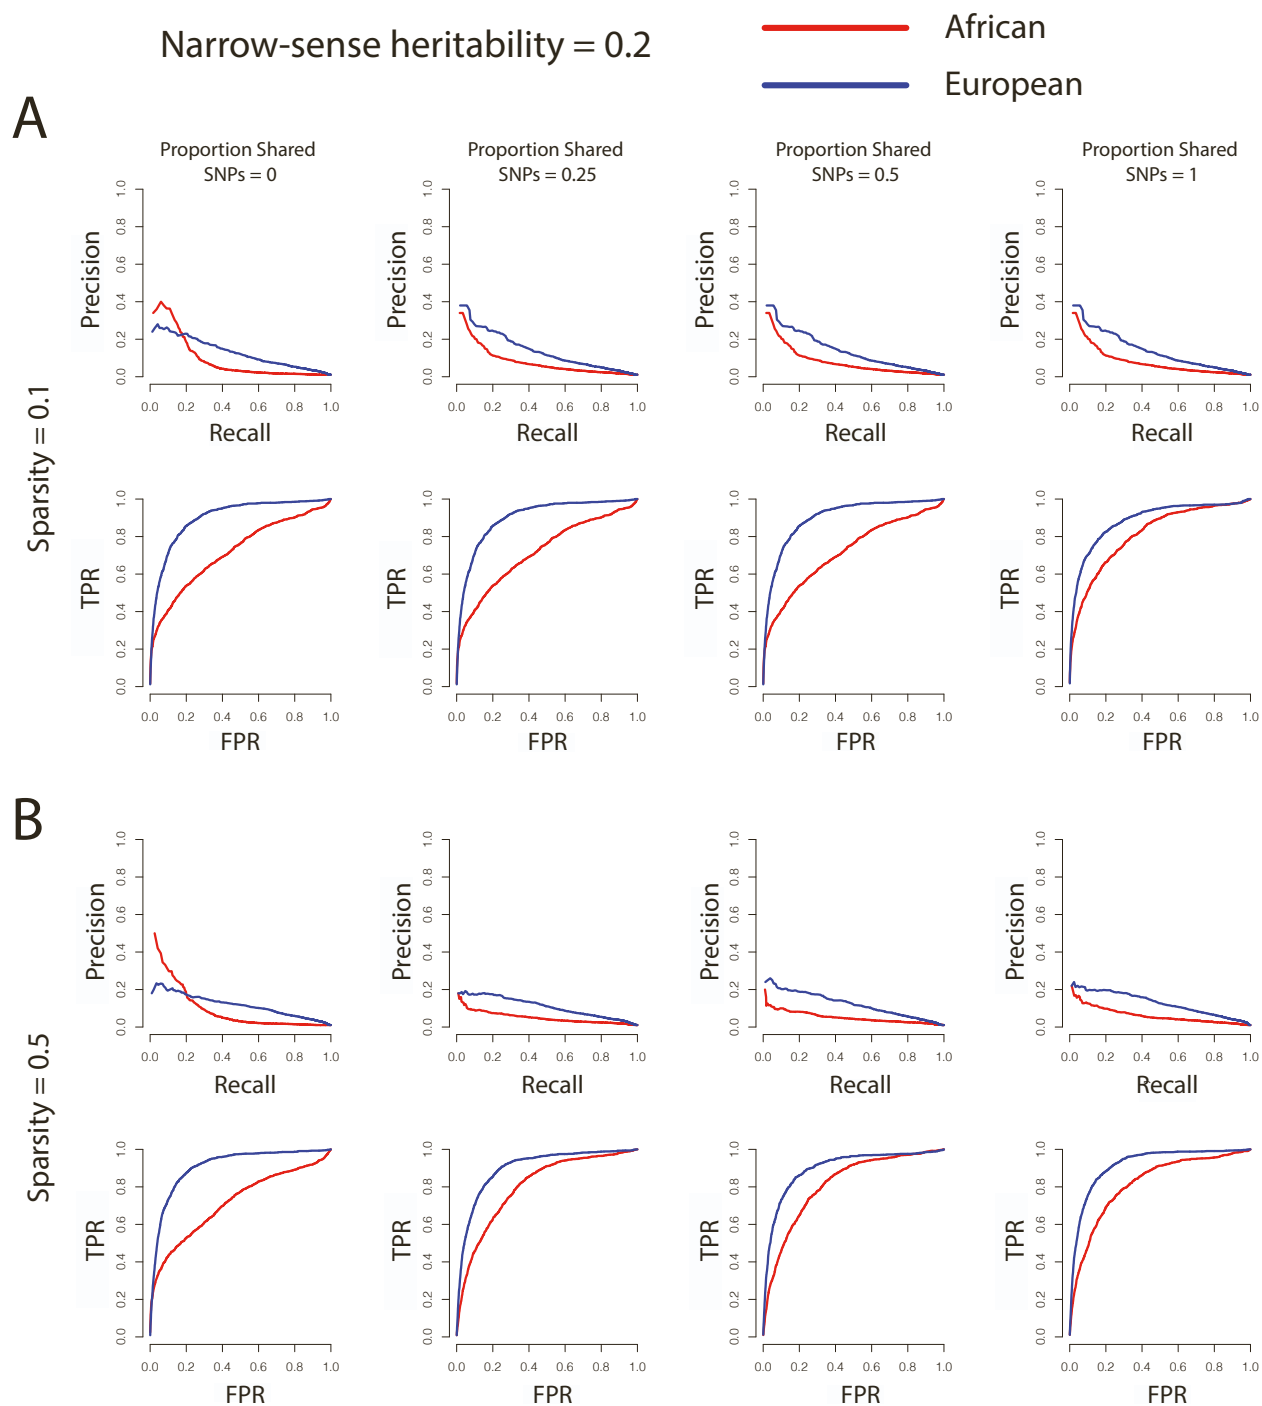

**Figure S9: gene- $\epsilon$  identifies associated genes in two simulated ancestry cohorts under a variety of genetic architectures with low narrow sense heritability.** **A.** Precision-recall (top row) and receiver operating curves (bottom row) for gene- $\epsilon$  analysis of cohorts simulated using genotypes from individuals of European ( $N = 10,000$ ; blue line) and African ( $N = 4,967$ ; red line) ancestry, respectively. Narrow-sense heritability was set to  $h^2 = 0.2$  in each simulation. Sparsity of causal SNPs was set to a proportion of 0.1 and the proportion of causal SNPs shared was tested at different values. 50 replicates of each set of simulations under each parameter were performed. **B.** Precision-recall (top row) and receiver operating curves (bottom row) for gene- $\epsilon$  analysis of 50 replicated simulations of a European and African cohort using a causal SNP sparsity of 0.5.

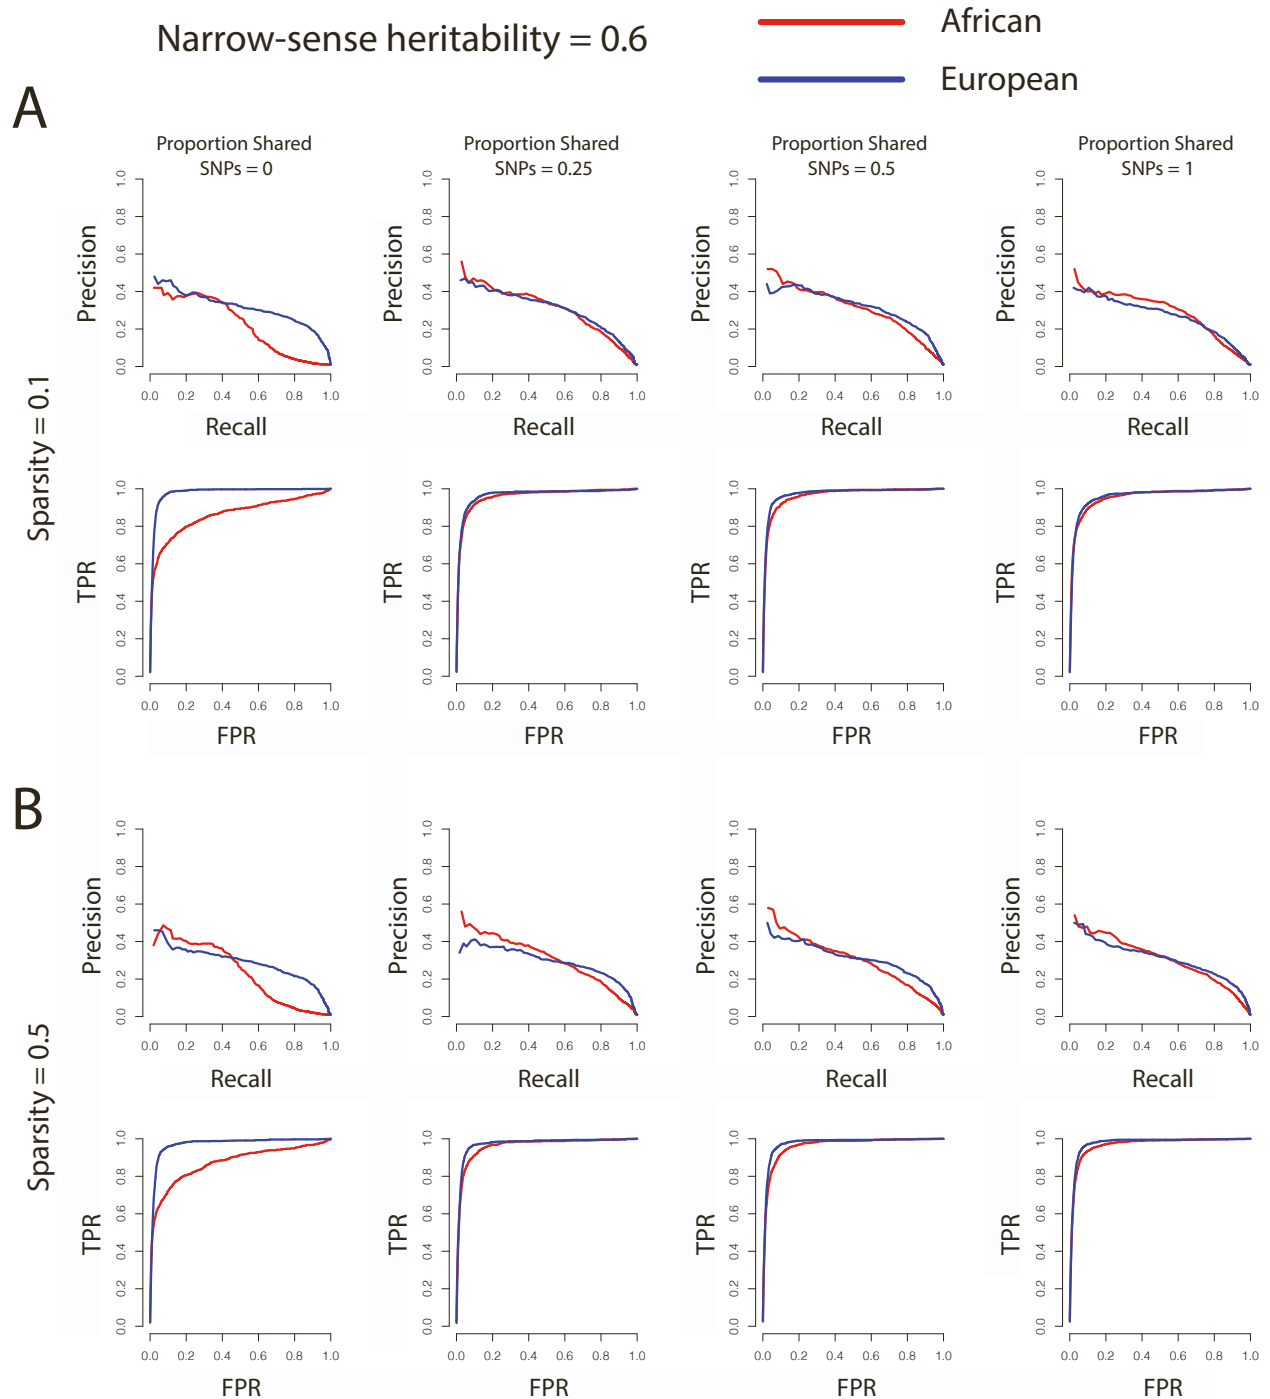

**Figure S10: gene- $\epsilon$  identifies associated genes in two simulated ancestry cohorts under a variety of genetic architectures with high narrow sense heritability. A.** Precision-recall (top row) and receiver operating curves (bottom row) for gene- $\epsilon$  analysis of cohorts simulated using genotypes from individuals of European ( $N = 10,000$ ; blue line) and African ( $N = 4,967$ ; red line) ancestry, respectively. Narrow-sense heritability was set to  $h^2 = 0.6$  in each simulation. Sparsity of causal SNPs was set to a proportion of 0.1 and the proportion of causal SNPs shared was tested at different values. 50 replicates of each set of simulations under each parameter were performed. **B.** Precision-recall (top row) and receiver operating curves (bottom row) for gene- $\epsilon$  analysis of 50 replicated simulations of a European and African cohort using a causal SNP sparsity of 0.5.



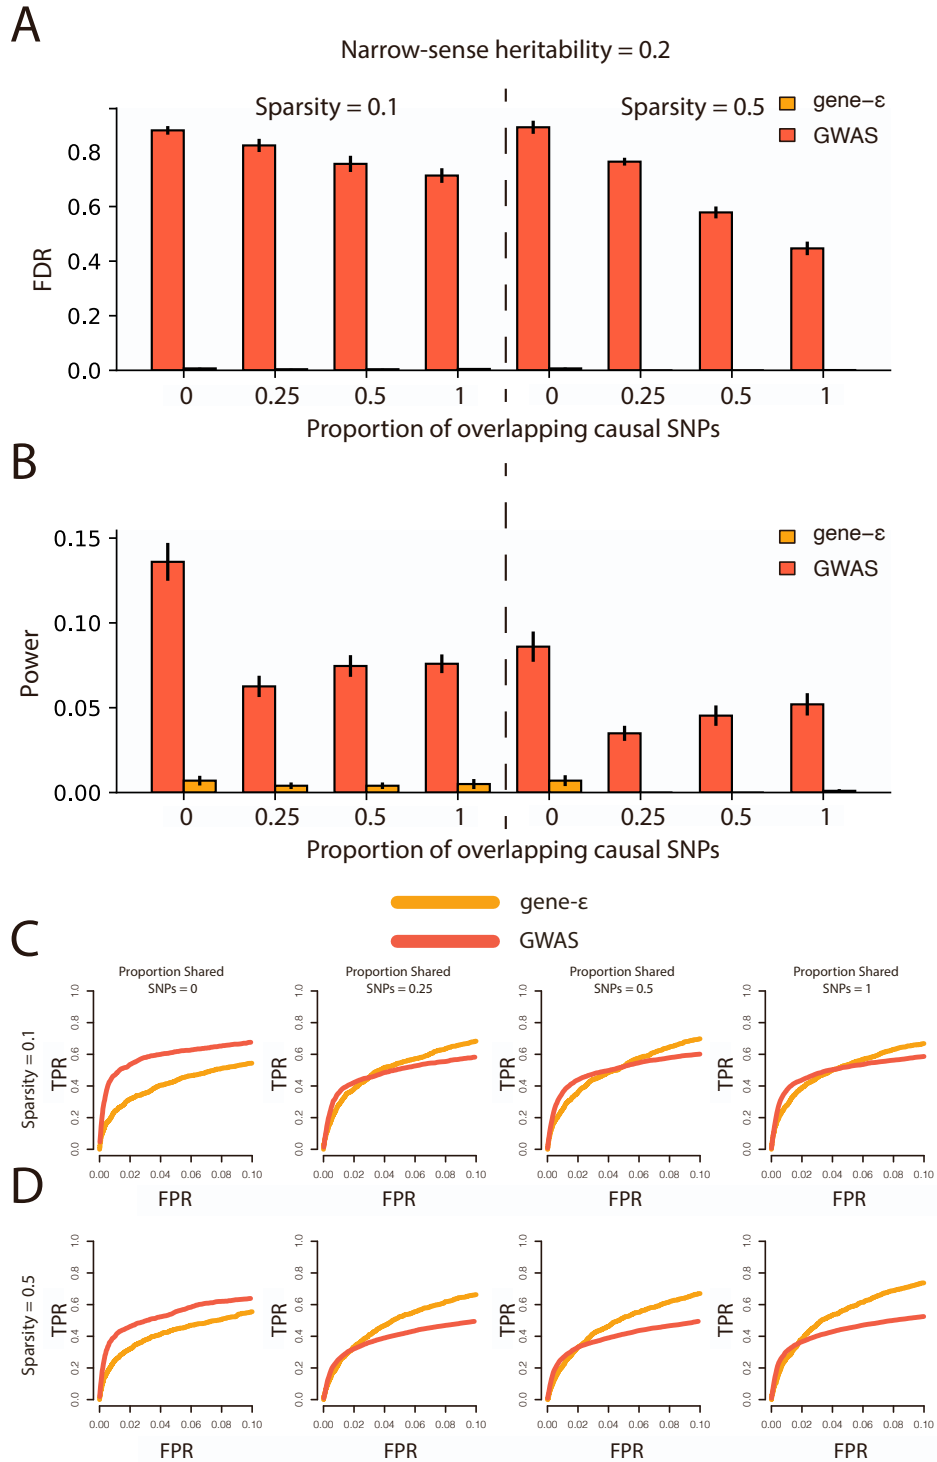

**Figure S11: gene- $\epsilon$  (orange) has a lower false discovery rate for identification of shared genetic determinants between cohorts than the standard GWA framework (red).** Narrow-sense heritability (percent variance explained by the genotype matrix) was set to  $h^2 = 0.2$  for all simulations. **A.** False discovery rate of shared genetic determinants between two ancestry cohorts using varying levels of causal SNP sparsity and proportion of shared causal SNPs between the cohorts. **B.** Power of gene- $\epsilon$  and the standard GWA framework to detect shared genetic determinants between two cohorts. Error bars were calculated using the results from 50 simulations of each parameter set of sparsity and proportion of shared causal SNPs for both FDR(**A**) and Power(**B**). **C.** Receiver operating curves corresponding to simulations of genetic architecture when causal SNP sparsity is equal to 0.1 (corresponding to the left-hand panels of **A** and **B**). **D.** Receiver operating curves corresponding to simulations of genetic architecture when causal SNP

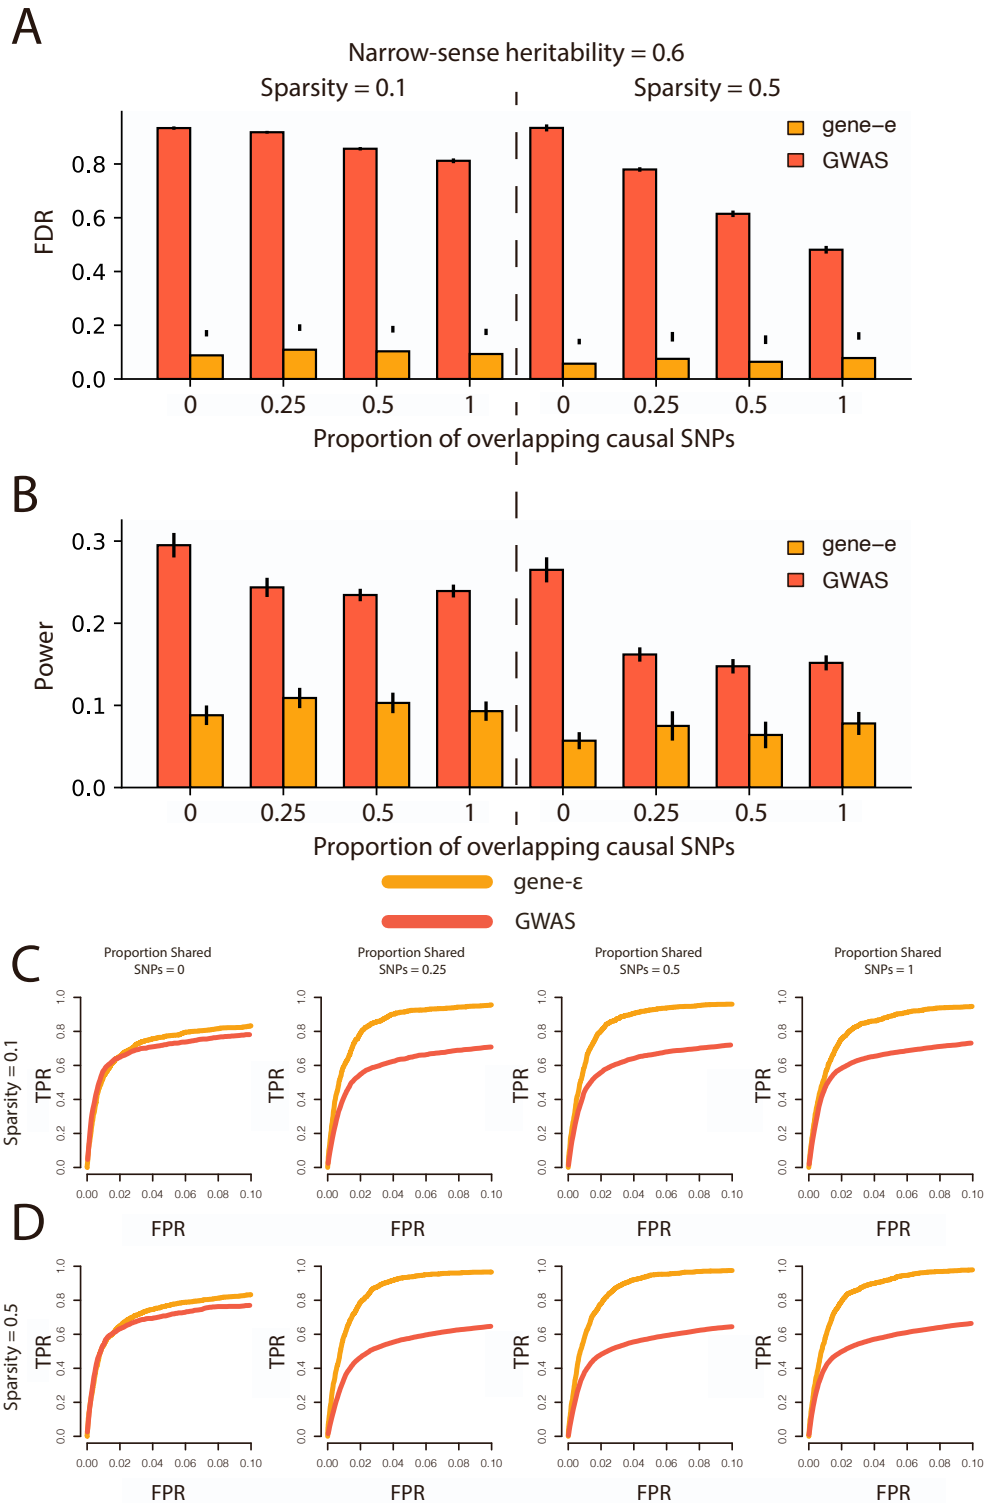

**Figure S12: gene- $\epsilon$  (orange) has a lower false discovery rate for identification of shared genetic determinants between cohorts than the standard GWA framework (red).** Narrow-sense heritability (percent variance explained by the genotype matrix) was set to  $h^2 = 0.6$  for all simulations. **A.** False discovery rate of shared genetic determinants between two ancestry cohorts using varying levels of causal SNP sparsity and proportion of shared causal SNPs between the cohorts. **B.** Power of gene- $\epsilon$  and the standard GWA framework to detect shared genetic determinants between two cohorts. Error bars were calculated using the results from 50 simulations of each parameter set of sparsity and proportion of shared causal SNPs for both FDR(**A**) and Power(**B**). **C.** Receiver operating curves corresponding to simulations of genetic architecture when causal SNP sparsity is equal to 0.1 (corresponding to the left-hand panels of **A** and **B**). **D.** Receiver operating curves corresponding to simulations of genetic architecture when causal SNP sparsity is equal to 0.5 (corresponding to the right-hand panels of **A** and **B**).

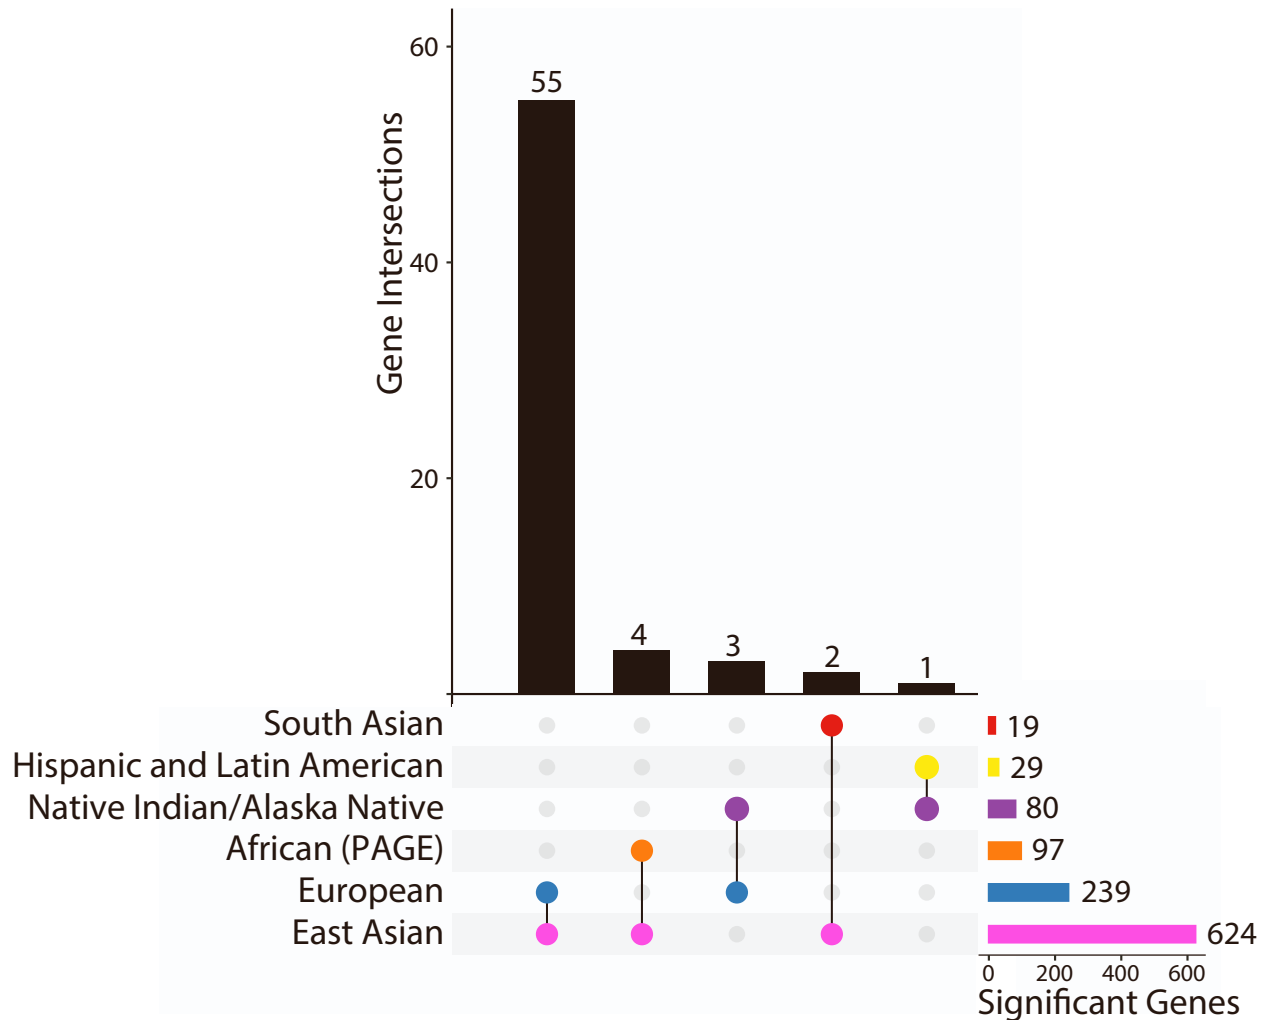

**Figure S13: All six ancestries have gene-level associations with platelet count that replicate in at least one other ancestry.** Total number of genome-wide significant genes in each ancestry, after correcting for total number of regions tested, are given in the bar plot located in the bottom right (significance thresholds are given in [Table S16](#) sample sizes are given in [Table S6](#)-[Table S9](#)). Shared gene-level association statistics between pairs of ancestries are shown in the vertical bar plot; the pair of ancestries represented by each bar can be identified using the dots and links below the barplot. Of the 65 genome-wide significant gene-level association statistics that replicate in at least two ancestry cohorts, only 25 contain SNPs that have been previously associated with platelet count in at least one ancestry in at least one study in the GWAS catalog (<https://www.ebi.ac.uk/gwas/home>) This plot was generated using the UpSetR package<sup>56</sup>.

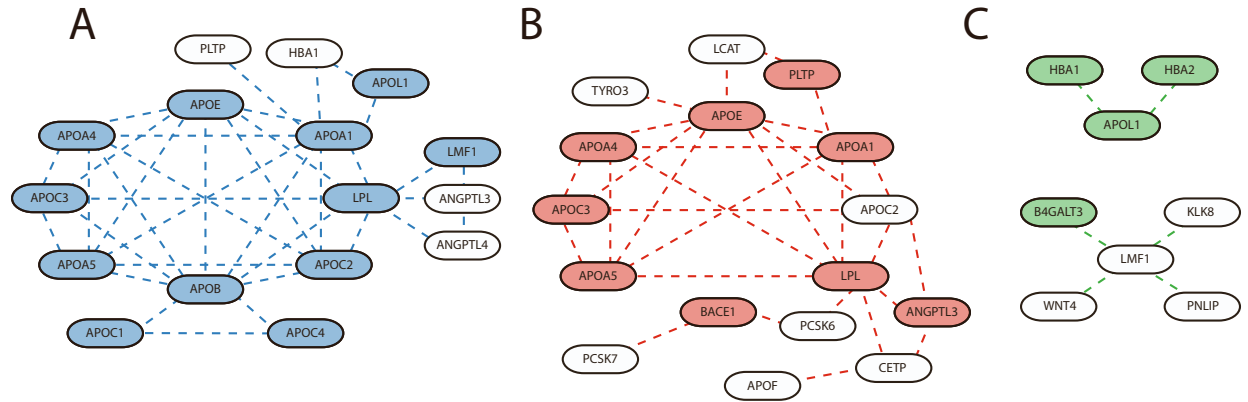

**Figure S14: Significantly mutated subnetworks associated with triglyceride levels identified in the (A) European, (B) East Asian, and (C) Native Hawaiian ancestry cohorts.** Significantly mutated subnetworks were identified using the Hierarchical HotNet method<sup>50</sup>. Genes that were identified in each ancestry as significantly associated with triglyceride levels using the gene- $\epsilon$  method are shaded using ancestry-specific color coding (also used in Figure 3) European—blue, East Asian—pink, Native Hawaiian—green). Significantly mutated subnetworks in the (A) European and (B) East Asian cohorts were identified using the ReactomeFl<sup>57</sup> protein-protein interaction network, and the significantly mutated subnetwork in the (C) the Native Hawaiian cohort was identified using the iRefIndex 15.0<sup>58</sup> protein-protein interaction networks. Genes that are present in any of the significantly mutated subnetworks that contain SNPs previously associated with triglyceride levels in the GWAS Catalog are listed with corresponding citations in Table S25.

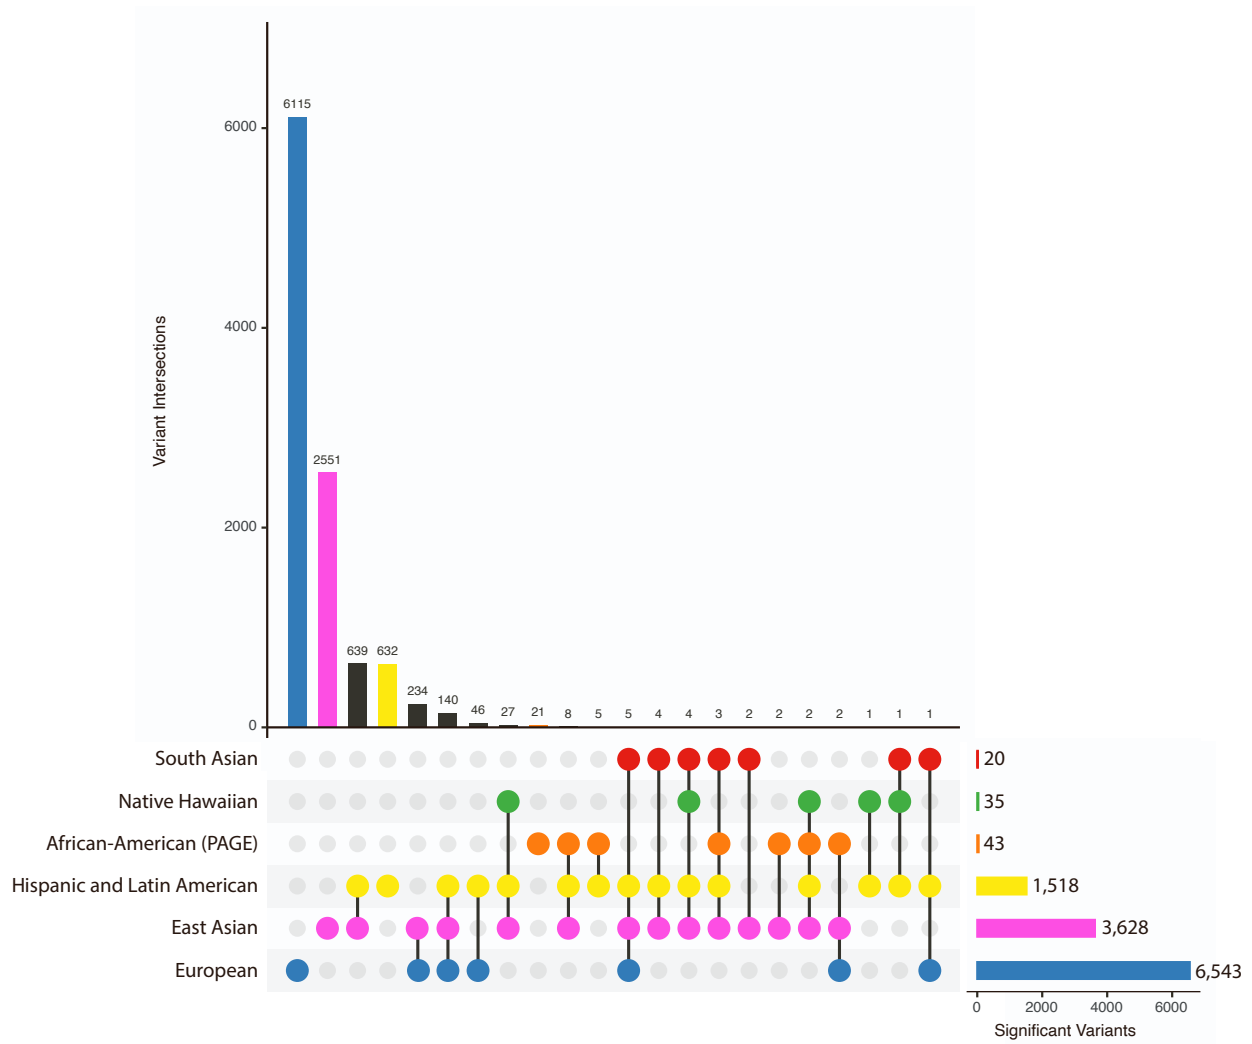

**Figure S15: Shared SNP-level associations with triglyceride levels in six ancestral cohorts.** Total number of genome-wide significant genes in each ancestry, after correcting for total number of regions tested, are given in the bar plot located in the bottom right (significance thresholds are given in [Table S11](#) and sample sizes are given in [Table S6](#) - [Table S9](#)). Shared SNP-level association statistics between pairs of ancestries are shown in the vertical bar plot. The pair of ancestries represented by each bar can be identified using the dots and links below the vertical barplot. This plot was generated using the UpSetR package<sup>56</sup>.

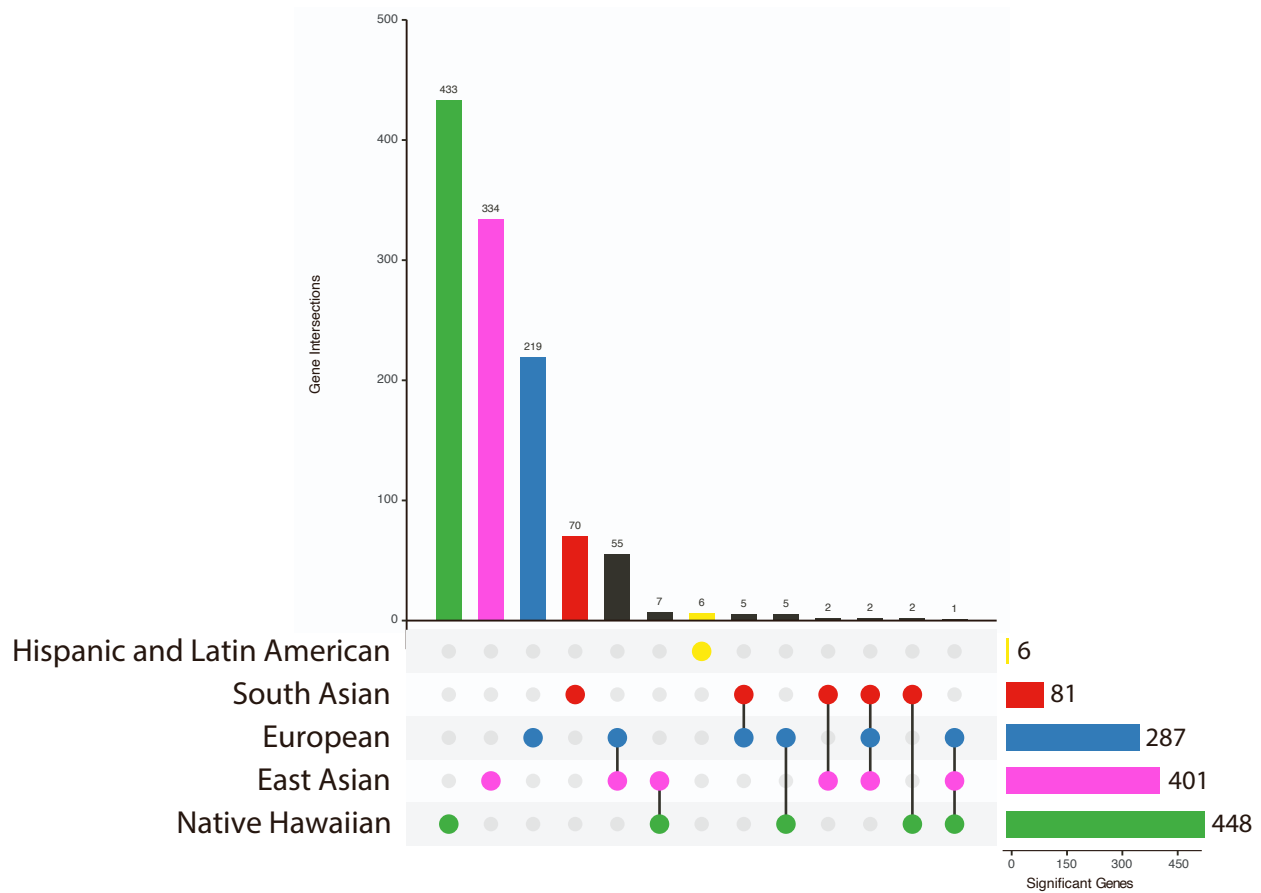

**Figure S16: Shared gene-level associations with triglyceride levels in five ancestral cohorts.** Total number of genome-wide significant genes in each ancestry, after correcting for total number of regions tested, are given in the bar plot located in the bottom right (significance thresholds are given in [Table S16](#) and sample sizes are given in [Table S6](#) - [Table S9](#)). Shared gene-level association statistics between pairs of ancestries are shown in the vertical bar plot. The pair of ancestries represented by each bar can be identified using the dots and links below the vertical barplot. This plot was generated using the UpSetR package<sup>56</sup>.

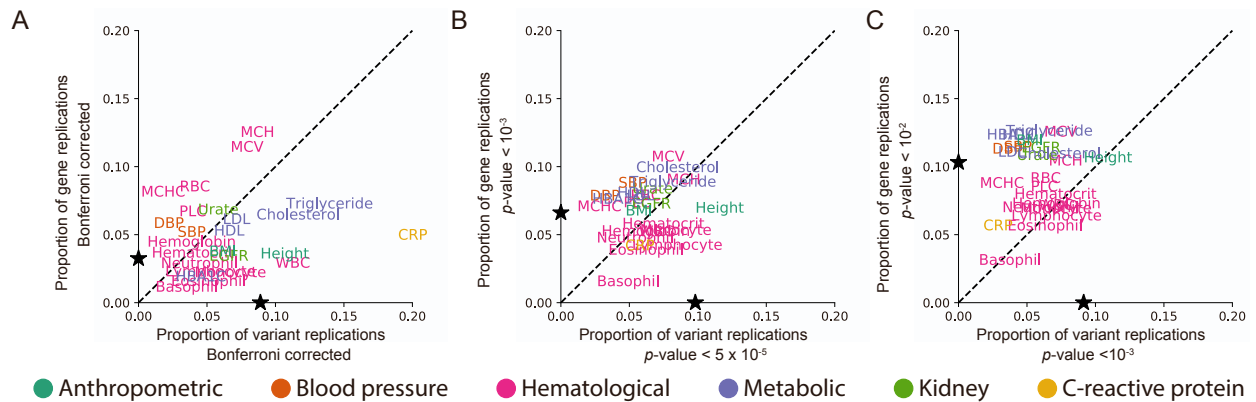

**Figure S17: Less stringent significance thresholds lead to a decrease in the proportion of replicated SNP-level associations and an increase in the proportion of gene-level associations among ancestries for each of the 25 traits analyzed.** **A.** Proportion of all SNP-level Bonferroni-corrected genome-wide significant associations in any ancestry that replicate in at least one other ancestry is shown on the x-axis (see [Table S11](#) for ancestry-trait specific Bonferroni corrected  $p$ -value thresholds). On the y-axis we show the proportion of significant gene-level associations that were replicated for a given phenotype in at least two ancestries (see [Table S16](#) for Bonferroni corrected significance thresholds for each ancestry-trait pair). The black stars on the x- and y-axes represent the mean proportion of replicates in SNP and gene analyses, respectively. C-reactive protein (CRP) contains the greatest proportion of replicated SNP-level associations of any of the phenotypes. **B.** The x-axis indicates the proportion of SNP-level associations that surpass a nominal threshold of  $p$ -value  $< 10^{-5}$  in at least one ancestry cohort that replicate in at least one other ancestry cohort. The y-axis indicates the proportion of gene-level associations that surpass a nominal threshold of  $p$ -value  $< 10^{-3}$  in at least one ancestry cohort and replicate in at least one other ancestry cohort. Nominal  $p$ -value thresholds tend to decrease the proportion of replicated SNP-level associations and tend to increase the proportion of replicated gene-level associations. The number of unique SNPs and genes that replicated in each cohort is given in [Figure S18](#). **C.** The x-axis indicates the proportion of SNP-level associations that surpass a nominal threshold of  $p$ -value  $< 10^{-3}$  in at least one ancestry cohort that replicate in at least one other ancestry cohort. The y-axis indicates the proportion of gene-level associations that surpass a nominal threshold of  $p$ -value  $< 10^{-2}$  in at least one ancestry cohort and replicate in at least one other ancestry cohort. The number of unique SNPs and genes that replicated in each cohort is given in [Figure S19](#). As shown in panel **B**, nominal  $p$ -value thresholds tend to decrease the proportion of replicated SNP-level associations and tend to increase the proportion of replicated gene-level associations. Expansion of three letter trait codes are given in [Table S2](#).

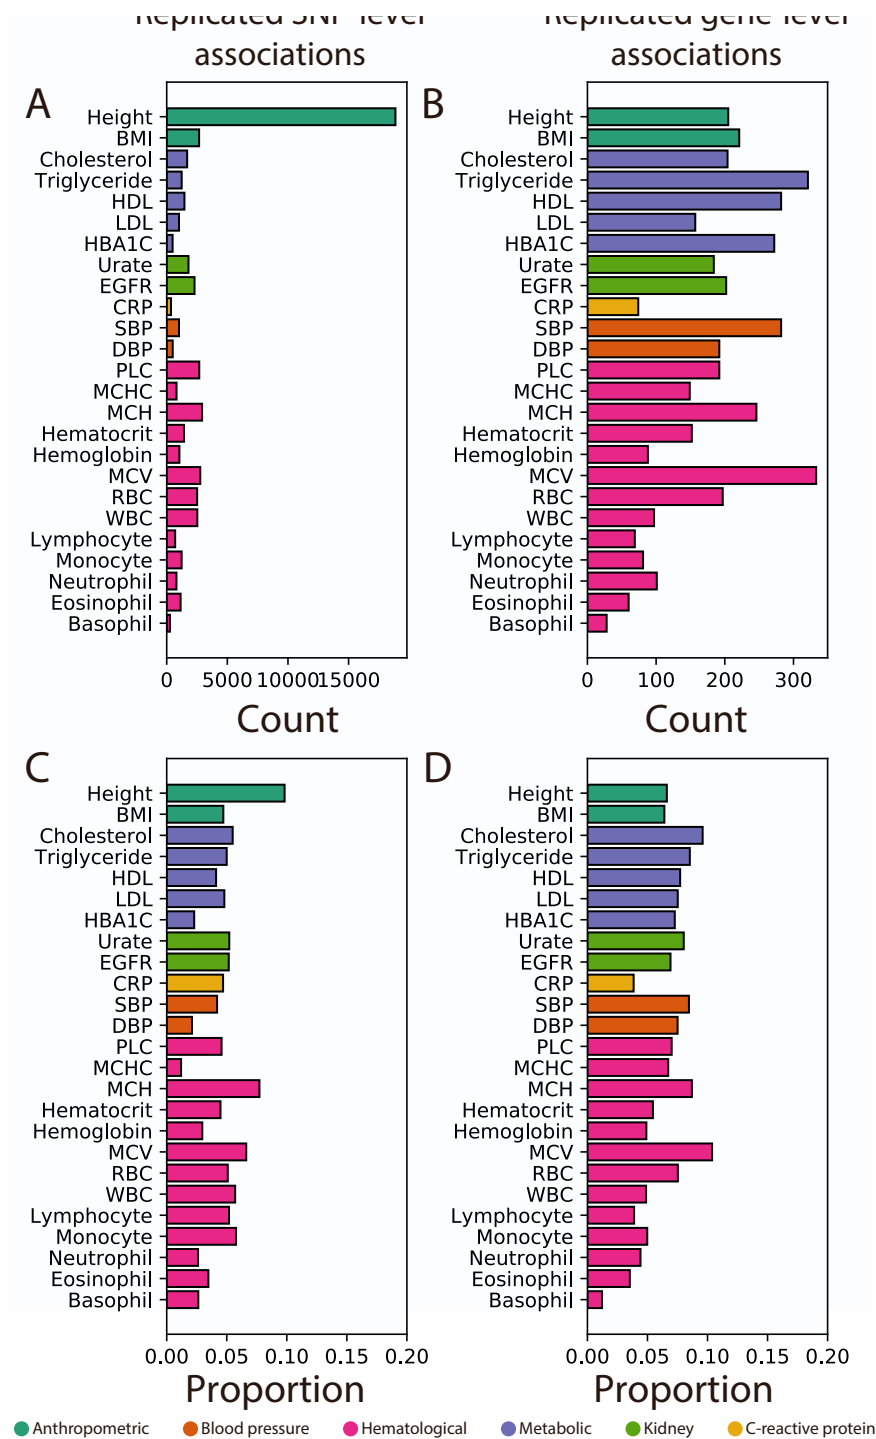

**Figure S18: Summaries of replicated associations at multiple genomic scales among ancestry cohorts for all 25 traits analyzed using nominal  $p$ -value thresholds (SNP  $p$ -value  $< 5 \times 10^{-5}$ , gene  $p$ -value  $< 10^{-3}$ ).** (A) Number and (C) proportion of genome-wide significant SNPs associated with a phenotype in at least one ancestry cohort that were replicated in at least two ancestry cohorts using a nominal  $p$ -value threshold of  $5 \times 10^{-5}$ . (B) Number and (D) proportion of genome-wide significant gene-level associations that replicate among ancestry cohorts using a nominal  $p$ -value threshold of  $10^{-3}$ . Expansion of three letter trait codes are given in [Table S2](#).



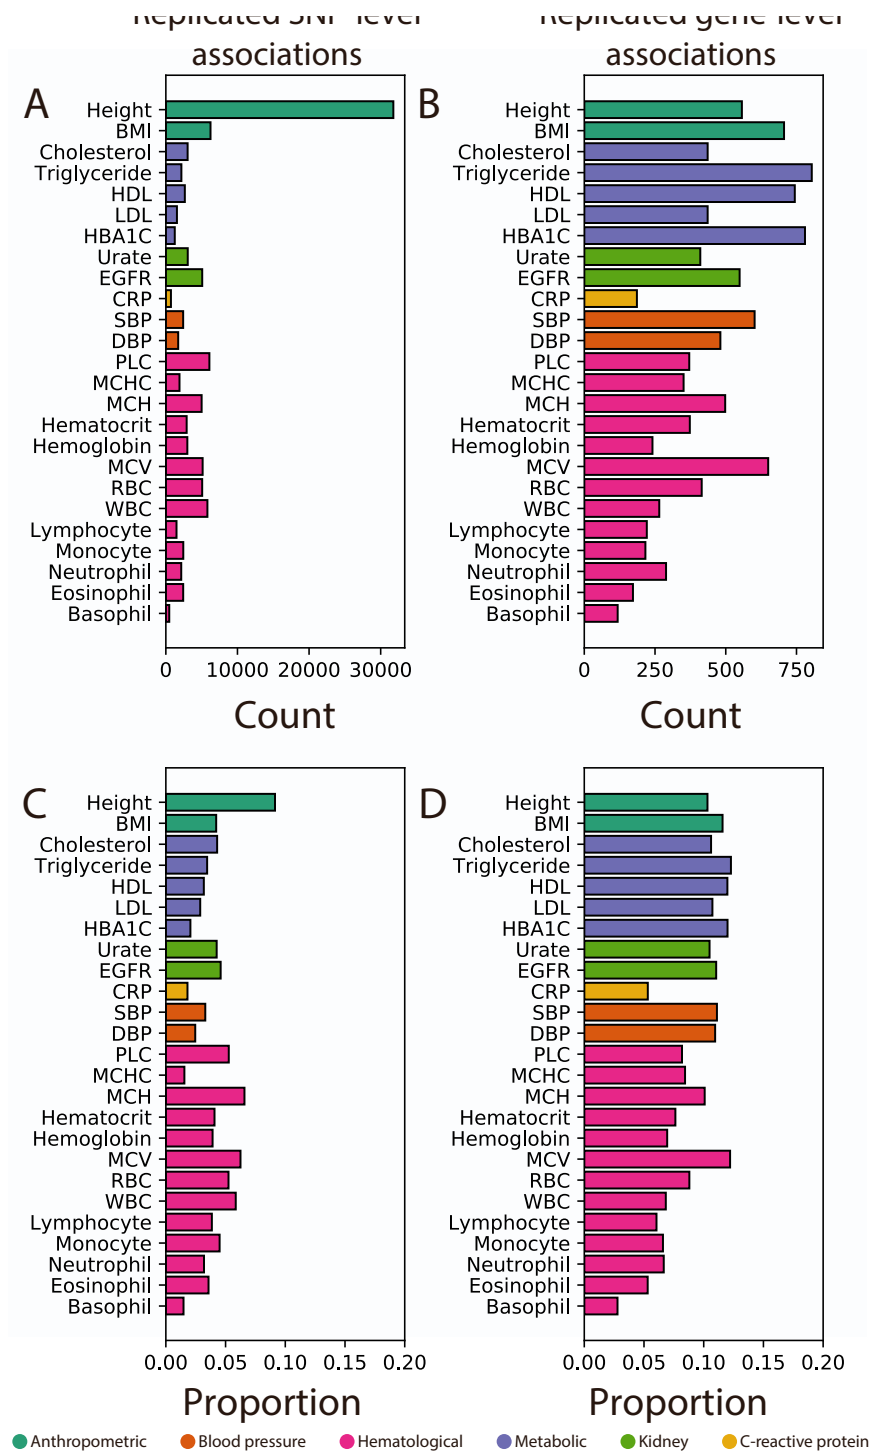

**Figure S19: Summaries of replicated associations at multiple genomic scales among ancestry cohorts for all 25 traits analyzed using nominal  $p$ -value thresholds (SNP  $p$ -value  $< 10^{-3}$ , gene  $p$ -value  $< 10^{-2}$ ).** (A) Number and (C) proportion of genome-wide significant SNPs associated with a phenotype in at least one ancestry cohort that were replicated in at least two ancestry cohorts using a nominal  $p$ -value threshold of  $10^{-3}$ . (B) Number and (D) proportion of genome-wide significant gene-level associations that replicate among ancestry cohorts using a nominal  $p$ -value threshold of  $10^{-2}$ . Expansion of three letter trait codes are given in [Table S2](#). Expansion of three letter trait codes are given in [Table S2](#).

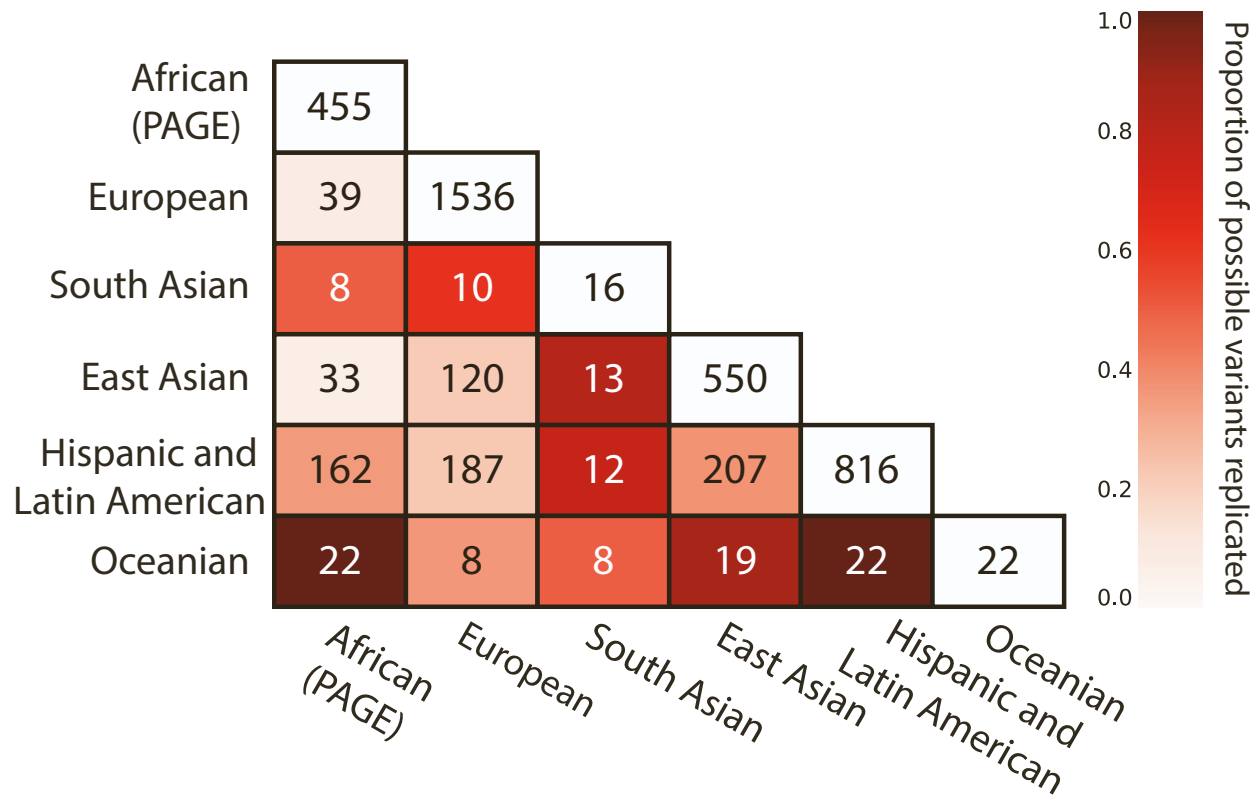

**Figure S20: Pairwise replication of SNP-level association signals for C-reactive protein in six ancestral cohorts using genotype and imputed data.** Imputed data was available and included in this analysis for each of the six cohorts. The inclusion of imputed SNPs in GWA analysis of C-reactive protein increases both the number of significant SNPs in each ancestry (along the diagonal) as well as the number of replicating significant SNP-level associations among pairs of ancestry cohorts (lower triangular). The corresponding analysis of pairwise SNP-level replication using only genotype data from each cohort is shown in Figure 2C.

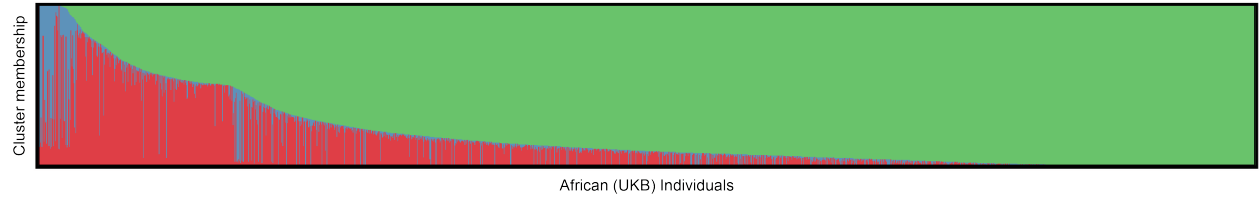

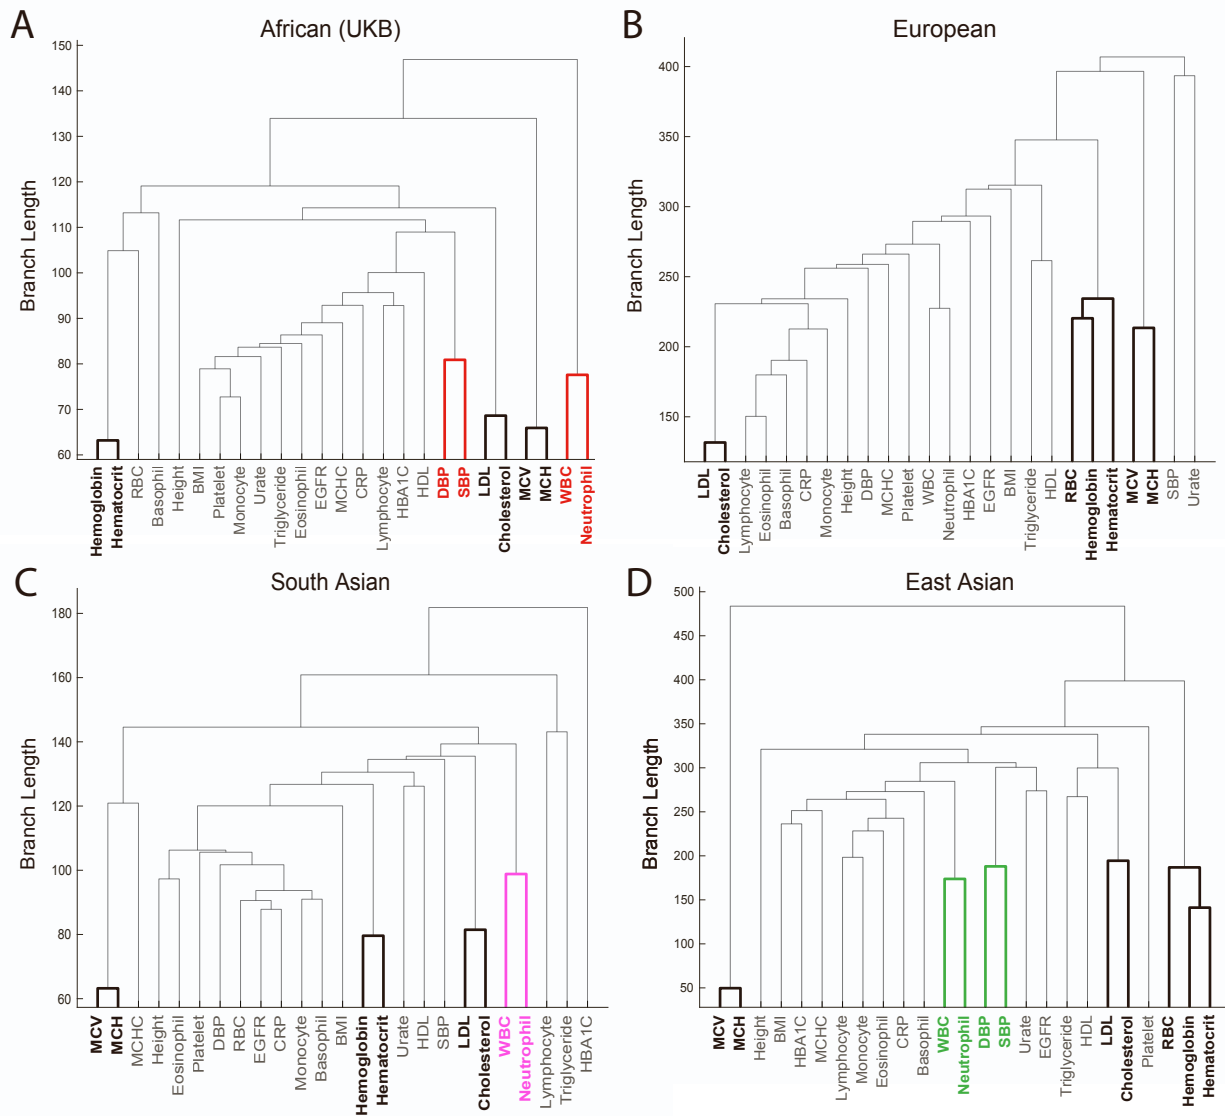

**Figure S21: Multiple prioritized trait clusters with shared core genetic trait architecture replicate in the (A) African (UKB), (B) European, (C) South Asian, and (D) East Asian ancestry cohorts.** The WINGS algorithm identified prioritized phenotype clusters in each of these ancestry cohorts, denoted in each dendrogram as clades with emboldened lines. Three clusters of phenotypes were found in all ancestries (shown and labeled in black), comprising: mean corpuscular volume (MCV) and mean corpuscular hemoglobin (MCH), hemoglobin and hematocrit, and the metabolic traits low-density lipoprotein (LDL) and cholesterol levels. In both the European and East Asian ancestry cohorts, red blood cell count (RBC) was also a member of the hemoglobin and hematocrit phenotype cluster. Two other phenotype clusters were identified in at least two ancestry cohorts. One of these clusters contains white blood cell count (WBC) and neutrophil count, and the other contains diastolic and systolic blood pressure (DBP and SBP). These two clusters are color-coded according to the ancestry cohorts in which they are prioritized. The WINGS algorithm was applied to traits from each ancestry cohort separately as described in the Supplemental Information.



| Ancestry cohort label in this study | Study         | Label from original study           | Sample Size      | Number of SNPs          |
|-------------------------------------|---------------|-------------------------------------|------------------|-------------------------|
| European                            | UK Biobank    | Self-identified white british       | 349,411          | 1,933,096               |
| East Asian                          | Biobank Japan | East Asian                          | 19,190 - 206,692 | 4,823,101 - 6,628,005   |
| Hispanic and Latin American         | PAGE          | Admixed Hispanic and Latin American | 15,522 - 21,955  | 8,576,622 - 8,822,607   |
| African-American (PAGE)             | PAGE          | African-American                    | 3,750 - 17,280   | 12,107,345 - 12,274,127 |
| South Asian                         | UK Biobank    | Self-identified South Asian         | 5,716            | 958,375                 |
| African (UKB)                       | UK Biobank    | African                             | 4,967            | 578,320                 |
| Native Hawaiian                     | PAGE          | Native Hawaiian                     | 1,777 - 3,938    | 6,656,996 - 6,966,169   |
| American Indian/Alaska Native       | PAGE          | AIAN                                | 574 - 645        | 3,970,247 - 8,504,923   |

**Table S1: Ancestry cohorts analyzed in this study.** In studies where GWA summary statistics were available to us, sample size and number of SNPs differ due to original study design. The specific sample size and number of SNPs for each trait in studies from Biobank Japan and PAGE are provided in [Table S5](#), [Table S10](#).

| Trait Name                                | Code  |
|-------------------------------------------|-------|
| Body mass index                           | BMI   |
| High density lipoprotein                  | HDL   |
| Low density lipoprotein                   | LDL   |
| Hemoglobin A1c                            | HBA1C |
| Estimated glomerular filtration rate      | EGFR  |
| C-reactive protein                        | CRP   |
| Systolic blood pressure                   | SBP   |
| Diastolic blood pressure                  | DBP   |
| Platelet count                            | PLC   |
| Mean corpuscular hemoglobin concentration | MCHC  |
| Mean corpuscular hemoglobin               | MCH   |
| Mean corpuscular volume                   | MCV   |
| Red blood cell count                      | RBC   |
| White blood cell count                    | WBC   |

**Table S2: Abbreviations used throughout this study for 14 quantitative traits analyzed in this study.** The remaining 11 traits analyzed were Basophil count, Cholesterol, Eosinophil count, Height, Hematocrit, Hemoglobin, Lymphocyte count, Monocyte count, Neutrophil count, and Triglyceride levels, respectively. These are not abbreviated in the main text.

| Trait Name or Code | AIAN | Native Hawaiian | Hispanic |
|--------------------|------|-----------------|----------|
| BMI                | Yes  | Yes             | Yes      |
| Basophil count     | No   | No              | No       |
| CRP                | Yes  | Yes             | Yes      |
| Cholesterol        | Yes  | Yes             | Yes      |
| DBP                | Yes  | No              | Yes      |
| EGFR               | Yes  | No              | Yes      |
| Eosinophil count   | No   | No              | No       |
| HBA1C              | Yes  | Yes             | Yes      |
| HDL                | Yes  | Yes             | Yes      |
| Height             | Yes  | Yes             | Yes      |
| Hematocrit         | No   | No              | No       |
| Hemoglobin         | No   | No              | No       |
| LDL                | Yes  | Yes             | Yes      |
| Lymphocyte count   | No   | No              | No       |
| MCH                | Yes  | No              | Yes      |
| MCHC               | No   | No              | No       |
| MCV                | No   | No              | No       |
| Monocyte count     | No   | No              | No       |
| Neutrophil count   | No   | No              | No       |
| PLC                | Yes  | No              | Yes      |
| RBC                | No   | No              | No       |
| SBP                | Yes  | No              | Yes      |
| Triglyceride       | No   | Yes             | Yes      |
| Urate              | No   | No              | No       |
| WBC                | Yes  | No              | Yes      |

**Table S3: Traits assayed in the PAGE study data by ancestry cohort.** Data were available for each of the 25 listed traits in the UK Biobank European, South Asian, and African cohorts, as well as, the East Asian cohort from the Biobank Japan. Thus, each trait was analyzed in a minimum of four ancestries and a maximum of seven ancestries.



| Trait        | Number of significant SNPs in at least the European or East Asian cohort | Number of SNPs with same direction of effect | Percentage of SNPs with same direction of effect |
|--------------|--------------------------------------------------------------------------|----------------------------------------------|--------------------------------------------------|
| BMI          | 6,374                                                                    | 4,456                                        | 69.91                                            |
| Basophil     | 884                                                                      | 520                                          | 58.82                                            |
| CRP          | 694                                                                      | 463                                          | 66.71                                            |
| Cholesterol  | 3,451                                                                    | 2,379                                        | 68.94                                            |
| DBP          | 1,962                                                                    | 1,320                                        | 67.28                                            |
| EGFR         | 7,129                                                                    | 5,038                                        | 70.67                                            |
| Eosinophil   | 5,890                                                                    | 3,608                                        | 61.26                                            |
| HBA1C        | 3,030                                                                    | 2,206                                        | 72.81                                            |
| HDL          | 5,995                                                                    | 4,077                                        | 68.01                                            |
| Height       | 33,577                                                                   | 22,090                                       | 65.79                                            |
| Hematocrit   | 5,382                                                                    | 3,602                                        | 66.93                                            |
| Hemoglobin   | 5,280                                                                    | 3,601                                        | 68.20                                            |
| LDL          | 2,521                                                                    | 1,929                                        | 76.56                                            |
| Lymphocyte   | 2,214                                                                    | 1,237                                        | 55.87                                            |
| MCH          | 6,763                                                                    | 4,674                                        | 69.11                                            |
| MCHC         | 1,760                                                                    | 1,124                                        | 63.86                                            |
| MCV          | 7,489                                                                    | 5,208                                        | 69.54                                            |
| Monocyte     | 3,929                                                                    | 2,565                                        | 65.28                                            |
| Neutrophil   | 5,431                                                                    | 3,850                                        | 70.89                                            |
| PLC          | 11,014                                                                   | 7,161                                        | 65.02                                            |
| RBC          | 9,211                                                                    | 6,263                                        | 67.99                                            |
| SBP          | 1,807                                                                    | 1,182                                        | 65.41                                            |
| Triglyceride | 3,743                                                                    | 2,686                                        | 71.76                                            |
| WBC          | 6,017                                                                    | 4,105                                        | 68.22                                            |
| Urate        | 5,864                                                                    | 3,787                                        | 64.58                                            |

**Table S4: Effect size homogeneity in variants identified as significant in the European or East Asian cohorts.** In each of the 25 traits analyzed in this study a majority of variants that are significant in at least the European or East Asian cohorts had the same direction of effect in the other ancestry cohort.

| Trait Name or Code | Sample Size | Total SNPs | Pruned SNPs | Regions | Citations          |
|--------------------|-------------|------------|-------------|---------|--------------------|
| Basophil count     | 62,076      | 5,653,566  | 410,465     | 23,106  | <a href="#">59</a> |
| BMI                | 158,284     | 5,653,566  | 410,465     | 23,085  | <a href="#">60</a> |
| CRP                | 75,391      | 5,608,701  | 408,166     | 23,108  | <a href="#">59</a> |
| DBP                | 136,615     | 5,653,566  | 410,465     | 23,085  | <a href="#">59</a> |
| eGFR               | 143,658     | 5,608,701  | 408,166     | 23,108  | <a href="#">59</a> |
| Eosinophil count   | 62,076      | 5,653,566  | 410,465     | 23,106  | <a href="#">59</a> |
| HDL                | 70,657      | 5,608,701  | 408,166     | 23,108  | <a href="#">59</a> |
| Height             | 159,095     | 6,296,332  | 354,647     | 23,679  | <a href="#">61</a> |
| Hematocrit         | 108,757     | 5,653,566  | 410,465     | 23,106  | <a href="#">59</a> |
| Hemoglobin         | 108,769     | 5,653,566  | 410,465     | 23,085  | <a href="#">59</a> |
| HbA1c              | 75,391      | 5,608,701  | 408,166     | 23,108  | <a href="#">59</a> |
| LDL                | 72,866      | 5,608,701  | 408,166     | 23,108  | <a href="#">59</a> |
| Lymphocyte count   | 62,076      | 5,653,566  | 410,465     | 23,106  | <a href="#">59</a> |
| MCH                | 108,054     | 5,653,566  | 410,465     | 23,106  | <a href="#">59</a> |
| MCHC               | 108,738     | 5,653,566  | 410,465     | 23,106  | <a href="#">59</a> |
| MCV                | 108,526     | 5,653,566  | 410,465     | 23,085  | <a href="#">59</a> |
| Monocyte count     | 62,076      | 5,653,566  | 410,465     | 23,106  | <a href="#">59</a> |
| Neutrophil count   | 62,076      | 5,653,566  | 410,465     | 23,106  | <a href="#">59</a> |
| PLC                | 108,208     | 5,653,566  | 410,465     | 23,085  | <a href="#">59</a> |
| RBC                | 108,794     | 5,653,566  | 410,465     | 23,085  | <a href="#">59</a> |
| SBP                | 136,597     | 5,653,566  | 410,465     | 23,085  | <a href="#">59</a> |
| Cholesterol        | 128,305     | 5,608,701  | 408,166     | 23,108  | <a href="#">59</a> |
| Triglyceride       | 105,597     | 5,608,701  | 410,465     | 23,108  | <a href="#">59</a> |
| Urate              | 109,029     | 5,608,701  | 408,166     | 23,108  | <a href="#">59</a> |
| WBC                | 107,694     | 5,653,566  | 408,166     | 23,085  | <a href="#">59</a> |

**Table S5: Number of individuals, total SNPs, pruned SNPs used for gene- $\epsilon$ , and genes and transcription factors (regions) included in the analysis for each trait in Biobank Japan data. Regions were defined using the hg19 list provided in Gusev et al.[62](#).**

| Trait Name or Code | Sample Size | Total SNPs | Pruned SNPs | Regions |
|--------------------|-------------|------------|-------------|---------|
| BMI                | 17,127      | 12,139,115 | 404,401     | 24,216  |
| CRP                | 8,349       | 12,274,126 | 404,572     | 24,206  |
| DBP                | 11,380      | 12,148,801 | 405,188     | 24,218  |
| eGFR               | 8,261       | 12,128,273 | 403,371     | 24,207  |
| Hemoglobin A1c     | 17,127      | 12,139,115 | 404,401     | 24,215  |
| HDL                | 10,085      | 12,114,827 | 404,089     | 24,201  |
| Height             | 17,280      | 12,139,907 | 404,522     | 24,201  |
| LDL                | 9,720       | 12,107,344 | 403,740     | 24,218  |
| MCHC               | 3,750       | 12,132,232 | 405,558     | 24,217  |
| PLC                | 8,850       | 12,131,935 | 404,497     | 24,193  |
| SBP                | 11,380      | 12,148,801 | 405,188     | 24,218  |
| Cholesterol        | 10,137      | 12,110,337 | 403,674     | 24,222  |
| Triglyceride       | 9,980       | 12,110,879 | 403,455     | 24,206  |
| WBC                | 8,802       | 12,126,732 | 404,579     | 24,219  |

**Table S6: Number of individuals, total SNPs, pruned SNPs used for gene- $\epsilon$ , and genes and transcription factors (regions) included in the analysis for each trait in the African-American cohort of the PAGE study data.**

| Trait Name or Code                   | Sample Size | Total SNPs | Pruned SNPs | Region Count |
|--------------------------------------|-------------|------------|-------------|--------------|
| BMI                                  | 21,955      | 8,812,436  | 432,762     | 24,138       |
| CRP                                  | 15,912      | 8,576,621  | 397,941     | 24,118       |
| DBP                                  | 21,549      | 8,784,112  | 430,360     | 24,126       |
| Estimated glomerular filtration rate | 18,548      | 8,702,426  | 422,598     | 24,123       |
| HbA1c                                | 21,955      | 8,812,436  | 432,762     | 24,138       |
| HDL                                  | 17,751      | 8,583,603  | 412,771     | 24,122       |
| Height                               | 22,187      | 8,822,606  | 433,604     | 24,132       |
| LDL                                  | 17,373      | 8,588,800  | 413,074     | 24,116       |
| MCHC                                 | 15,522      | 8,763,739  | 427,208     | 24,132       |
| PLC                                  | 18,949      | 8,612,804  | 415,201     | 24,115       |
| SBP                                  | 21,549      | 8,784,112  | 430,360     | 24,126       |
| Cholesterol                          | 17,802      | 8,586,887  | 412,830     | 24,115       |
| Triglyceride                         | 17,856      | 8,594,121  | 413,546     | 24,104       |
| WBC                                  | 18,206      | 8,603,503  | 414,462     | 24,123       |

**Table S7: Number of individuals, total SNPs, pruned SNPs used for gene- $\epsilon$ , and genes and transcription factors (regions) included in the analysis for each trait in the Hispanic and Latin American cohort of the PAGE study data.**

| Trait Name or Code      | Sample Size | Total SNPs | Pruned SNPs | Regions |
|-------------------------|-------------|------------|-------------|---------|
| BMI                     | 645         | 8,374,976  | 421,826     | 24,124  |
| CRP                     | 574         | 8,504,922  | 417,287     | 24,136  |
| DBP                     | 636         | 8,376,521  | 421,528     | 24,136  |
| eGFR                    | 602         | 8,336,044  | 417,540     | 24,132  |
| Hemoglobin A1c          | 645         | 8,374,976  | 421,826     | 24,124  |
| HDL                     | 604         | 8,315,912  | 415,939     | 24,121  |
| Height                  | 645         | 8,375,624  | 421,750     | 24,117  |
| LDL                     | 591         | 8,360,719  | 419,544     | 24,123  |
| MCHC                    | 620         | 3,970,246  | 62,339      | 17,381  |
| PLC                     | 603         | 8,294,302  | 414,530     | 24,133  |
| Systolic blood pressure | 636         | 8,376,521  | 421,528     | 24,136  |
| Cholesterol             | 604         | 8,586,887  | 415,939     | 24,121  |
| WBC                     | 602         | 8,289,567  | 414,462     | 24,133  |

**Table S8: Number of individuals, total SNPs, pruned SNPs used for gene- $\epsilon$ , and genes and transcription factors (regions) included in the analysis for each trait in the AIAN cohort of the PAGE study data.**

| Trait Name or Code | Sample Size | Total SNPs | Pruned SNPs | Regions |
|--------------------|-------------|------------|-------------|---------|
| BMI                | 3,936       | 6,664,738  | 415,221     | 23,885  |
| CRP                | 1,777       | 6,966,169  | 428,517     | 23,834  |
| Hemoglobin A1c     | 3,936       | 6,664,738  | 415,221     | 23,885  |
| HDL                | 1,912       | 6,656,996  | 416,255     | 23,894  |
| Height             | 3,938       | 6,660,920  | 415,172     | 23,878  |
| LDL                | 1,900       | 6,662,802  | 416,810     | 23,895  |
| Cholesterol        | 1,915       | 6,660,807  | 416,425     | 23,899  |
| Triglycerides      | 1,915       | 6,660,807  | 416,425     | 23,899  |

**Table S9: Number of individuals, total SNPs, pruned SNPs used for gene- $\epsilon$ , and genes and transcription factors (regions) included in the analysis for each trait in the Native Hawaiian (Native Hawaiian) cohort of the PAGE study data.**

| Trait Name or Code | Sample Size | Total SNPs | Pruned SNPs | Regions |
|--------------------|-------------|------------|-------------|---------|
| BMI                | 4,647       | 15,362,633 | 433,356     | 24,085  |
| CRP                | 1,811       | 14,374,461 | 428,656     | 24,116  |
| DBP                | 1,086       | 12,470,507 | 416,273     | 24,112  |
| eGFR               | 150         | 8,314,417  | 337,167     | 24,017  |
| HbA1c              | 4,647       | 15,362,633 | 433,356     | 24,085  |
| HDL                | 2,378       | 13,413,244 | 428,598     | 24,072  |
| Height             | 4,679       | 15,366,710 | 433,005     | 24,103  |
| LDL                | 2,316       | 13,327,313 | 428,741     | 24,075  |
| MCHC               | 128         | 8,089,136  | 315,583     | 23,946  |
| PLC                | 541         | 10,528,072 | 421,929     | 24,098  |
| SBP                | 1,086       | 12,470,507 | 416,273     | 24,112  |
| Cholesterol        | 2,387       | 13,436,190 | 428,656     | 24,078  |
| Triglyceride       | 2,381       | 13,423,953 | 429,246     | 24,073  |
| WBC                | 543         | 10,570,051 | 421,776     | 24,095  |

**Table S10: Number of individuals, total SNPs, pruned SNPs used for gene- $\epsilon$ , and genes and transcription factors (regions) included in the analysis for each trait in the Asian cohort of the PAGE study data.**

| Trait Name or Code | African or African-American<br>( $\times 10^{-8}$ ) | East Asian<br>( $\times 10^{-8}$ ) | AIAN<br>( $\times 10^{-8}$ ) | Native Hawaiian<br>( $\times 10^{-9}$ ) | Hispanic<br>( $\times 10^{-8}$ ) |
|--------------------|-----------------------------------------------------|------------------------------------|------------------------------|-----------------------------------------|----------------------------------|
| Basophil count     | 8.646*                                              | 8.844                              | NA                           | NA                                      | NA                               |
| BMI                | 0.412                                               | 8.844                              | 0.597                        | 7.502                                   | 5.674                            |
| CRP                | 0.407                                               | 8.915                              | 0.588                        | 7.176                                   | 5.830                            |
| Cholesterol        | 0.414                                               | 8.915                              | 0.601                        | 7.507                                   | 5.823                            |
| DBP                | 0.412                                               | 8.844                              | 0.597                        | NA                                      | 5.692                            |
| EGFR               | 0.412                                               | 8.915                              | 0.600                        | NA                                      | 5.746                            |
| Eosinophil count   | 8.646*                                              | 8.844                              | NA                           | NA                                      | NA                               |
| HBA1C              | 0.412                                               | 8.915                              | 0.597                        | 7.502                                   | 5.674                            |
| HDL                | 0.413                                               | 8.915                              | 0.601                        | 7.511                                   | 5.825                            |
| Height             | 0.412                                               | 7.941                              | 0.597                        | 7.506                                   | 5.667                            |
| Hematocrit         | 8.646*                                              | 8.844                              | NA                           | NA                                      | NA                               |
| Hemoglobin         | 8.646*                                              | 8.844                              | NA                           | NA                                      | NA                               |
| LDL                | 0.413                                               | 8.914                              | 0.598                        | 7.504                                   | 5.822                            |
| Lymphocyte count   | 8.646*                                              | 8.843                              | NA                           | NA                                      | NA                               |
| MCH                | 8.646*                                              | 8.844                              | NA                           | NA                                      | NA                               |
| MCHC               | 0.412                                               | 8.844                              | 1.259                        | NA                                      | 5.705                            |
| MCV                | 8.646*                                              | 8.844                              | NA                           | NA                                      | NA                               |
| Monocyte count     | 8.646*                                              | 8.844                              | NA                           | NA                                      | NA                               |
| Neutrophil count   | 8.646*                                              | 8.844                              | NA                           | NA                                      | NA                               |
| PLC                | 0.412                                               | 8.844                              | 0.603                        | NA                                      | 5.805                            |
| RBC                | 8.646*                                              | 8.844                              | NA                           | NA                                      | NA                               |
| SBP                | 0.412                                               | 8.844                              | 0.597                        | NA                                      | 5.692                            |
| Triglyceride       | 0.413                                               | 8.915                              | NA                           | 7.507                                   | 5.818                            |
| Urate              | 8.646*                                              | 8.915                              | NA                           | NA                                      | NA                               |
| WBC                | 0.412                                               | 8.844                              | NA                           | NA                                      | 5.812                            |

**Table S11: Bonferroni  $p$ -value threshold corrected for number of SNP-level association tests performed for each ancestry-trait pair.** Thresholds are calculated as 0.05 divided by the number of SNPs tested in each ancestry-trait pair. The term "NA" indicates that there was no data for that ancestry-trait pair. The threshold for Bonferroni-corrected significance was the same for every trait in the European ( $p$ -value  $< 2.587 \times 10^{-8}$ ) and South Asian ( $p$ -value  $< 5.217 \times 10^{-8}$ ) cohorts from the UK Biobank. Traits for which the UK Biobank African cohort was used are denoted with a \*; otherwise, the African-American cohort from the PAGE study data was used. See [Table S2](#) for expansion of trait codes.

| Trait Name or Code | Nominal Significance Threshold | Number of Variants Tested | Number of Replicated Variants | Proportion of Replicated Variants | Unidentified non-European Associations |
|--------------------|--------------------------------|---------------------------|-------------------------------|-----------------------------------|----------------------------------------|
| MCV                | $1.46 \times 10^{-05}$         | 3,414                     | 2,008                         | 0.588                             | 7,830                                  |
| PLC                | $1.25 \times 10^{-05}$         | 3,998                     | 1,792                         | 0.448                             | 6,073                                  |
| Height             | $2.80 \times 10^{-06}$         | 17,877                    | 10,406                        | 0.582                             | 37,360                                 |
| BMI                | $2.22 \times 10^{-05}$         | 2,254                     | 1,478                         | 0.656                             | 2,762                                  |
| DBP                | $5.37 \times 10^{-05}$         | 931                       | 528                           | 0.567                             | 719                                    |
| SBP                | $8.17 \times 10^{-05}$         | 612                       | 352                           | 0.575                             | 1,315                                  |
| WBC                | $1.87 \times 10^{-05}$         | 2,680                     | 1,192                         | 0.445                             | 17,800                                 |
| RBC                | $1.71 \times 10^{-05}$         | 2,918                     | 1,674                         | 0.574                             | 3514                                   |
| Hemoglobin         | $3.48 \times 10^{-05}$         | 1,436                     | 5,80                          | 0.404                             | 368                                    |
| Hematocrit         | $2.99 \times 10^{-05}$         | 1,670                     | 1,068                         | 0.640                             | 524                                    |
| MCH                | $1.56 \times 10^{-05}$         | 3,214                     | 1,904                         | 0.592                             | 7,851                                  |
| MCHC               | $4.58 \times 10^{-05}$         | 1,091                     | 722                           | 0.662                             | 26,507                                 |
| Lymphocyte         | $8.03 \times 10^{-05}$         | 623                       | 327                           | 0.525                             | 536                                    |
| Monocyte           | $3.53 \times 10^{-05}$         | 1,418                     | 896                           | 0.632                             | 1,568                                  |
| Neutrophil         | $5.07 \times 10^{-05}$         | 987                       | 527                           | 0.534                             | 1,550                                  |
| Eosinophil         | $4.00 \times 10^{-05}$         | 1,249                     | 802                           | 0.642                             | 2,143                                  |
| Basophil           | $9.62 \times 10^{-04}$         | 52                        | 49                            | 0.942                             | 2,017                                  |
| Urate              | $2.56 \times 10^{-05}$         | 1,951                     | 1,414                         | 0.725                             | 6,530                                  |
| Triglyceride       | $3.99 \times 10^{-05}$         | 1,254                     | 928                           | 0.740                             | 3,902                                  |
| Cholesterol        | $1.96 \times 10^{-05}$         | 2,557                     | 1,742                         | 0.681                             | 2,847                                  |
| LDL                | $3.16 \times 10^{-05}$         | 1,580                     | 1,115                         | 0.706                             | 1,735                                  |
| HDL                | $2.86 \times 10^{-05}$         | 1,751                     | 1,089                         | 0.622                             | 4,737                                  |
| HBA1C              | $6.31 \times 10^{-05}$         | 7,92                      | 4,16                          | 0.525                             | 899                                    |
| EGFR               | $2.00 \times 10^{-05}$         | 2,506                     | 1,315                         | 0.525                             | 2,227                                  |

**Table S12: Nominal  $p$ -value threshold corrected for number of Bonferroni-corrected SNP-level associations found in the European ancestry cohort.** To illustrate how SNP-level statistical replication among ancestry cohorts is prohibited by external factors (e.g. sample sizes, genotype array design), We calculated the number of SNP-level replications when thresholds for non-European cohorts are calculated as 0.05 divided by the number of significant SNPs in the European cohort. This design is analogous to a two-stage GWA framework, where non-European ancestry cohorts are not used for discovery and associations discovered in the European ancestry cohort are used to find replicates. Replication of SNP-level association signals increases when less stringent thresholds are used. Number of variants that were tested in the European ancestry cohort and at least one another cohort were included in this calculation and are given here. We also include the number of variants that were identified in non-European ancestry cohorts using a Bonferroni-corrected significance threshold to illustrate how this study design may miss signals in other ancestries. See [Table S2](#) for expansion of trait codes.

| Gene         | European     | East Asian   | South Asian | African-American | Hispanic and Latin American | AIAN            | Native Hawaiian |
|--------------|--------------|--------------|-------------|------------------|-----------------------------|-----------------|-----------------|
| MCV          | 0.013-0.153  | 0.024-0.153  | 0.136-0.268 | 0.113-0.522      | NA                          | NA              | NA              |
| PLC          | 0.0132-0.190 | 0.024-0.140  | 0.124-0.171 | 5.715-17.196     | 3.732-18.805                | 100.736-100.736 | 0.0             |
| Height       | 0.009-0.115  | 0.0178-0.150 | NA          | 0.064-0.267      | 0.051-0.113                 | NA              | NA              |
| BMI          | 0.0133-0.113 | 0.020-0.110  | NA          | 0.068-0.068      | 0.064-0.101                 | NA              | NA              |
| DBP          | 0.0136-0.070 | 0.022-0.074  | NA          | NA               | 0.787-0.806                 | NA              | NA              |
| SBP          | 0.0129-0.066 | 0.022-0.064  | NA          | NA               | 4.64-4.643                  | NA              | NA              |
| WBC          | 0.0135-0.122 | 0.024-0.104  | 0.117-0.145 | 0.027-0.198      | 0.018-0.112                 | NA              | NA              |
| RBC          | 0.012-0.107  | 0.025-0.142  | NA          | 0.115-0.297      | NA                          | NA              | NA              |
| Hemoglobin   | 0.0108-0.129 | 0.025-0.083  | NA          | 0.162-0.232      | NA                          | NA              | NA              |
| Hematocrit   | 0.011-0.093  | 0.024-0.085  | NA          | 0.241-0.241      | NA                          | NA              | NA              |
| MCH          | 0.013-0.159  | 0.024-0.153  | 0.104-0.277 | 0.109-0.541      | NA                          | NA              | NA              |
| MCHC         | 0.014-0.115  | 0.024-0.106  | NA          | 0.152-1.28       | 0.088-0.489                 | 0.118-9.222     | MA              |
| Lymphocyte   | 0.014-0.078  | 0.033-0.264  | 0.503-0.503 | 0.647-0.647      | NA                          | NA              | NA              |
| Monocyte     | 0.0133-0.195 | 0.0329-0.123 | NA          | 0.423-0.423      | NA                          | NA              | NA              |
| Neutrophil   | 0.014-0.160  | 0.033-0.106  | 0.123-0.142 | 0.108-0.518      | NA                          | NA              | NA              |
| Eosinophil   | 0.013-0.149  | 0.033-0.188  | NA          | NA               | NA                          | NA              | NA              |
| Basophil     | 0.014-0.120  | 0.033-0.167  | 0.363-0.581 | 0.241-0.626      | NA                          | NA              | NA              |
| Urate        | 0.0112-0.097 | 0.024-0.346  | 0.092-0.251 | 0.104-0.682      | NA                          | NA              | NA              |
| Triglyceride | 0.013-0.204  | 0.0247-0.318 | 0.113-0.311 | 0.043-0.616      | 0.032-0.159                 | NA              | 0.102-0.169     |
| Cholesterol  | 0.013-0.309  | 0.023-0.285  | 0.118-0.268 | 4.280-30.434     | 2.734-15.098                | NA              | NA              |
| LDL          | 0.0136-0.121 | 0.030-0.514  | 0.139-0.367 | 3.785-29.006     | 2.371-18.999                | 16.273-33.101   | 14.133-16.297   |
| HDL          | 0.013-0.296  | 0.030-0.529  | 0.106-0.369 | 1.368-23.818     | 0.838-32.374                | NA              | 22.726-46.409   |
| HBA1C        | 0.013-0.090  | 0.039-0.139  | NA          | 0.068-0.068      | 0.064-0.101                 | NA              | NA              |
| EGFR         | 0.0133-0.195 | 0.021-0.095  | 0.119-0.162 | NA               | 1.102-1.102                 | 12.494-27.656   | 0.0             |
| CRP          | 0.0137-0.122 | 0.0300-0.127 | 0.106-0.263 | 0.094-0.418      | 0.0626-0.434                | NA              | 0.211-0.254     |

**Table S13: Range of effect sizes for significant SNPs in each ancestry cohort.**



| Trait Name or Code | African                | South Asian            | Native Hawaiian        | AIAN                   | Hispanic and Latin American |
|--------------------|------------------------|------------------------|------------------------|------------------------|-----------------------------|
| Hemoglobin         | $1.464 \times 10^{-7}$ | NA                     | 0.0                    | 0.0                    | 0.0                         |
| Height             | <b>0.999</b>           | $7.930 \times 10^{-5}$ | 0.0006                 | NA                     | <b>0.948</b>                |
| PLC                | <b>0.958</b>           | 0.0006                 | 0.0                    | NA                     | <b>0.993</b>                |
| MCV                | 0.1123                 | 0.0004                 | 0.0                    | 0.0                    | 0.0                         |
| BMI                | 0.079                  | 0.056                  | 0.005                  | NA                     | <b>0.970</b>                |
| DBP                | 0.0009                 | NA                     | 0.0                    | NA                     | 0.015                       |
| SBP                | $9.078 \times 10^{-6}$ | NA                     | 0.0                    | NA                     | 0.027                       |
| WBC                | 0.227                  | 0.048                  | 0.0                    | NA                     | <b>0.914</b>                |
| RBC                | 0.001                  | 0.010                  | 0.0                    | 0.0                    | 0.0                         |
| Hematocrit         | $1.287 \times 10^{-7}$ | NA                     | 0.0                    | 0.0                    | 0.0                         |
| MCH                | 0.321                  | 0.016                  | 0.0                    | 0.0                    | 0.0                         |
| MCHC               | 0.001                  | NA                     | 0.0                    | $6.814 \times 10^{-8}$ | 0.285                       |
| Lymphocyte         | NA                     | $4.931 \times 10^{-6}$ | 0.0                    | 0.0                    | 0.0                         |
| Monocyte           | 0.093                  | 0.137                  | 0.0                    | 0.0                    | 0.0                         |
| Neutrophil         | $1.722 \times 10^{-7}$ | $6.244 \times 10^{-6}$ | 0.0                    | 0.0                    | 0.0                         |
| Eosinophil         | 0.044                  | $1.499 \times 10^{-5}$ | 0.0                    | 0.0                    | 0.0                         |
| Basophil           | NA                     | $9.739 \times 10^{-5}$ | 0.0                    | 0.0                    | 0.0                         |
| Urate              | 0.002                  | 0.005                  | 0.0                    | 0.0                    | 0.0                         |
| Triglyceride       | 0.462                  | 0.171                  | NA                     | 0.0                    | <b>0.997</b>                |
| Cholesterol        | 0.897                  | 0.210                  | NA                     | NA                     | <b>0.998</b>                |
| LDL                | <b>0.963</b>           | NA                     | NA                     | NA                     | <b>0.997</b>                |
| HDL                | 0.345                  | 0.146                  | NA                     | NA                     | <b>0.930</b>                |
| HBA1C              | NA                     | NA                     | $3.092 \times 10^{-6}$ | NA                     | 0.024                       |
| EGFR               | NA                     | 0.031                  | 0.0                    | NA                     | 0.886                       |
| CRP                | 0.267                  | 0.137                  | 0.002                  | $1.686 \times 10^{-5}$ | <b>0.981</b>                |

**Table S14: Maximum power under the standard GWA framework to detect variants that were significant in both the European ancestry cohort and at least one other cohort.** For each ancestry-trait pair, power calculations were performed for all variants that were significant using a Bonferroni-corrected significance threshold and were significant in the corresponding ancestry (sorted by column). Power was calculated assuming the marginal European effect size to be the true effect size. Non-European ancestry minor allele frequencies and sample sizes were used in the power calculations. Calculations were performed using then framework defined in Sham and Purcell<sup>63</sup>. Comparisons where a variant had power to detect greater than 0.9 are shown in bold.

| Trait Name or Code | African | South Asian | Native Hawaiian | AIAN   | Hispanic and Latin American |
|--------------------|---------|-------------|-----------------|--------|-----------------------------|
| Hemoglobin         | 0(1)    | NA          | 0.0             | 0.0    | 0.0                         |
| Height             | 4(56)   | 0(2)        | 0(5)            | NA     | 16(408)                     |
| PLC                | 1(163)  | 0(8)        | 0.0             | NA     | 6(262)                      |
| MCV                | 0(18)   | 0(7)        | 0.0             | 0.0    | 0.0                         |
| BMI                | 0(3)    | 0(1)        | 0(35)           | NA     | 48(212)                     |
| DBP                | 0(1)    | NA          | 0.0             | NA     | 0(109)                      |
| SBP                | 0(1)    | NA          | 0.0             | NA     | 0(99)                       |
| WBC                | 0(71)   | 0(25)       | 0.0             | NA     | 35(104)                     |
| RBC                | 0(3)    | 0(3)        | 0.0             | 0.0    | 0.0                         |
| Hematocrit         | 0(1)    | NA          | 0.0             | 0.0    | 0.0                         |
| MCH                | 0(22)   | 0(8)        | 0.0             | 0.0    | 0.0                         |
| MCHC               | 0(3)    | NA          | 0.0             | 0(135) | 0(110)                      |
| Lymphocyte         | NA      | 0(7)        | 0.0             | 0.0    | 0.0                         |
| Monocyte           | 0(1)    | 0(2)        | 0.0             | 0.0    | 0.0                         |
| Neutrophil         | 0(2)    | 0(32)       | 0.0             | 0.0    | 0.0                         |
| Eosinophil         | 0(7)    | 0(1)        | 0.0             | 0.0    | 0.0                         |
| Basophil           | NA      | 0(2)        | 0.0             | 0.0    | 0.0                         |
| Urate              | 0(1)    | 0(8)        | 0.0             | 0.0    | 0.0                         |
| Triglyceride       | 0(30)   | 0(61)       | NA              | 0.0    | 124(311)                    |
| Cholesterol        | 0(85)   | 0(11)       | NA              | NA     | 16(943)                     |
| LDL                | 7(132)  | NA          | NA              | NA     | 17(634)                     |
| HDL                | 0(21)   | 0(31)       | NA              | NA     | 2(241)                      |
| HBA1C              | NA      | NA          | 0(39)           | NA     | 0(73)                       |
| EGFR               | NA      | 0(86)       | 0.0             | NA     | 0(5)                        |
| CRP                | 0(136)  | 0(32)       | 0(27)           | 0(8)   | 12(358)                     |

**Table S15: Number of variants that had greater than 90% power under the standard GWA framework that were significant in the European ancestry cohort and at least one other cohort.** Numbers in parentheses are the total number of variants that could be compared between the European and corresponding (column) ancestry cohort. Power was calculated assuming the marginal European effect size to be the true effect size. Non-European ancestry minor allele frequencies and sample sizes were used in the power calculations. Calculations were performed using then framework defined in Sham and Purcell<sup>[63]</sup>.

| Trait            | African or African-American<br>( $\times 10^{-6}$ ) | East Asian<br>( $\times 10^{-6}$ ) | AIAN<br>( $\times 10^{-6}$ ) | Native Hawaiian<br>( $\times 10^{-6}$ ) | Hispanic and Latin American<br>( $\times 10^{-6}$ ) |
|------------------|-----------------------------------------------------|------------------------------------|------------------------------|-----------------------------------------|-----------------------------------------------------|
| Basophil count   | 1.121                                               | 2.197                              | NA                           | NA                                      | NA                                                  |
| BMI              | 2.096                                               | 2.197                              | 2.073                        | 2.093                                   | 2.072                                               |
| CRP              | 2.097                                               | 2.085                              | 2.072                        | 2.100                                   | 2.073                                               |
| Cholesterol      | 2.096                                               | 2.198                              | 2.073                        | 2.092                                   | 2.073                                               |
| DBP              | 2.096                                               | 2.197                              | 2.072                        | NA                                      | 2.073                                               |
| EGFR             | 2.097                                               | 2.198                              | 2.073                        | NA                                      | 2.073                                               |
| Eosinophil count | 2.121*                                              | 2.197                              | NA                           | NA                                      | NA                                                  |
| HBA1C            | 2.096                                               | 2.198                              | 2.073                        | 2.093                                   | 2.072                                               |
| HDL              | 2.097                                               | 2.198                              | 2.073                        | 2.093                                   | 2.073                                               |
| Height           | 2.097                                               | 2.131                              | 2.073                        | 2.094                                   | 2.072                                               |
| Hematocrit       | 2.121*                                              | 2.197                              | NA                           | NA                                      | NA                                                  |
| Hemoglobin       | 2.121*                                              | 2.197                              | NA                           | NA                                      | NA                                                  |
| LDL              | 2.096                                               | 2.198                              | 2.073                        | 2.093                                   | 2.073                                               |
| Lymphocyte count | 2.121*                                              | 2.197                              | NA                           | NA                                      | NA                                                  |
| MCH              | 2.121*                                              | 2.197                              | NA                           | NA                                      | NA                                                  |
| MCHC             | 2.096                                               | 2.197                              | 2.877                        | NA                                      | 2.072                                               |
| MCV              | 2.121*                                              | 2.197                              | NA                           | NA                                      | NA                                                  |
| Monocyte count   | 2.121*                                              | 2.197                              | NA                           | NA                                      | NA                                                  |
| Neutrophil count | 2.121*                                              | 2.197                              | NA                           | NA                                      | NA                                                  |
| PLC              | 2.097                                               | 2.197                              | 2.072                        | NA                                      | 2.073                                               |
| RBC              | 2.121*                                              | 2.197                              | NA                           | NA                                      | NA                                                  |
| SBP              | 0.412                                               | 8.844                              | 0.597                        | NA                                      | 5.692                                               |
| Triglyceride     | 2.096                                               | 2.197                              | NA                           | 2.072                                   | 2.073                                               |
| Urate            | 2.121*                                              | 2.197                              | NA                           | NA                                      | NA                                                  |
| WBC              | 2.092                                               | 2.197                              | 2.072                        | NA                                      | 2.073                                               |

**Table S16: Bonferroni  $p$ -value threshold corrected for number of gene-level association tests performed for each ancestry-trait pair.** Thresholds are calculated as 0.05 divided by the number of SNPs tested in each ancestry-trait pair. The term "NA" indicates that there was no data for that ancestry-trait pair. The threshold for Bonferroni-corrected significance was the same for every trait in the European ( $p$ -value  $< 2.092 \times 10^{-6}$ ) and South Asian ( $p$ -value  $< 1.085 \times 10^{-6}$ ) cohorts from the UK Biobank. Traits for which the UK Biobank African cohort was used are denoted with a \*; otherwise, the African-American cohort from the PAGE study data was used. See [Table S2](#) for expansion of trait codes.

| Trait Name or Code | Initial gene-level associations | Pruned gene-level associations $r^2 > 0.25$ | Number of replicated associations | Proportion of replicated associations |
|--------------------|---------------------------------|---------------------------------------------|-----------------------------------|---------------------------------------|
| MCV                | 434                             | 336                                         | 174                               | 0.400                                 |
| PLC                | 241                             | 295                                         | 116                               | 0.481                                 |
| Height             | 192                             | 327                                         | 119                               | 0.620                                 |
| BMI                | 347                             | 482                                         | 93                                | 0.268                                 |
| DBP                | 215                             | 717                                         | 63                                | 0.293                                 |
| SBP                | 524                             | 375                                         | 53                                | 0.101                                 |
| WBC                | 167                             | 279                                         | 49                                | 0.293                                 |
| RBC                | 233                             | 476                                         | 77                                | 0.330                                 |
| Hemoglobin         | 175                             | 525                                         | 79                                | 0.451                                 |
| Hematocrit         | 267                             | 356                                         | 72                                | 0.270                                 |
| MCH                | 246                             | 562                                         | 161                               | 0.654                                 |
| MCHC               | 205                             | 388                                         | 106                               | 0.517                                 |
| Lymphocyte         | 38                              | 52                                          | 23                                | 0.605                                 |
| Monocyte           | 179                             | 122                                         | 71                                | 0.397                                 |
| Neutrophil         | 211                             | 549                                         | 124                               | 0.588                                 |
| Eosinophil         | 87                              | 482                                         | 56                                | 0.644                                 |
| Basophil           | 88                              | 237                                         | 35                                | 0.398                                 |
| Urate              | 391                             | 444                                         | 54                                | 0.138                                 |
| Triglyceride       | 285                             | 346                                         | 136                               | 0.477                                 |
| Cholesterol        | 167                             | 477                                         | 136                               | 0.814                                 |
| LDL                | 120                             | 443                                         | 67                                | 0.558                                 |
| HDL                | 213                             | 496                                         | 136                               | 0.638                                 |
| HBA1C              | 235                             | 421                                         | 89                                | 0.379                                 |
| CRP                | 105                             | 526                                         | 34                                | 0.324                                 |
| EGFR               | 294                             | 181                                         | 77                                | 0.262                                 |

**Table S17: Number and proportion of gene- $\epsilon$  gene-level associations that are replicated under a more stringent pruning threshold.** In our initial analysis of the European ancestry cohort we pruned all variants using an  $r^2 > 0.5$  threshold. Here, we set the threshold as  $r^2 > 0.25$  and recalculated the gene- $\epsilon$  gene-level association statistics for each trait (see ). Replication of associated genes using different  $r^2$  thresholds varies by trait, the inclusion of as many SNPs as computationally possible in the gene- $\epsilon$  framework is optimal in identifying trait associated genes.

| Trait        | PESCA EUR only and EUR GWA nominal significance | PESCA EAS only and EAS GWA nominal significance | PESCA both and EUR GWA nominal significance | PESCA both and EAS GWA nominal significance | PESCA both and GWA nominal significance in both |
|--------------|-------------------------------------------------|-------------------------------------------------|---------------------------------------------|---------------------------------------------|-------------------------------------------------|
| BMI          | 0                                               | 0                                               | 97                                          | 539                                         | 94                                              |
| Cholesterol  | 2                                               | 13                                              | 14                                          | 54                                          | 11                                              |
| HDL          | 5                                               | 8                                               | 29                                          | 74                                          | 27                                              |
| LDL          | 0                                               | 6                                               | 16                                          | 43                                          | 13                                              |
| MCH          | 3                                               | 14                                              | 39                                          | 180                                         | 39                                              |
| MCV          | 1                                               | 11                                              | 44                                          | 215                                         | 44                                              |
| Triglyceride | 4                                               | 8                                               | 15                                          | 49                                          | 15                                              |

**Table S18: Overlap between SNPs identified by PESCA and GWA analyses in the European ancestry cohort from the UK Biobank and the East Asian ancestry cohort from the Biobank Japan.** For seven continuous traits, we compared SNP-level association  $p$ -values from our analysis to the posterior probabilities calculated in Shi et al. [64] using the PESCA framework. For each of the seven traits, there were SNPs that had a posterior probability  $> 0.8$  of being causal in both ancestries and were also nominally significant ( $p$ -value  $5 < 10^{-6}$ ) using the standard GWA SNP-level framework.

| Trait Name or Code | Median Effect Size Correlation | Effect Sizes > 0.1 (Mean) | Median PIP Correlation | PIPs > 0.01 (Mean) |
|--------------------|--------------------------------|---------------------------|------------------------|--------------------|
| BMI                | 0.0143                         | 0                         | 0.073                  | 67.3               |
| Basophil           | $3.69 \times 10^{-6}$          | 0                         | 0.002                  | 211.8              |
| CRP                | 0.096                          | 0.7                       | 0.159                  | 142.6              |
| Cholesterol        | 0.966                          | 1                         | 0.232                  | 53.1               |
| DBP                | 0.001                          | 0.6                       | 0.012                  | 173.1              |
| EGFR               | $4.71 \times 10^{-6}$          | 0                         | 0.005                  | 149                |
| Eosinophil         | 0.0179                         | 0.2                       | 0.042                  | 325.8              |
| HBA1C              | 0.012                          | 0.2                       | 0.025                  | 26.8               |
| HDL                | 0.325                          | 0.1                       | 0.219                  | 57.6               |
| Height             | $9.20 \times 10^{-5}$          | 1.6                       | 0.010                  | 187.7              |
| Hematocrit         | $-4.16 \times 10^{-6}$         | 0.5                       | 0.015                  | 40.3               |
| Hemoglobin         | $-1.13 \times 10^{-5}$         | 0.6                       | 0.014                  | 45.8               |
| LDL                | 0.949                          | 1                         | 0.331                  | 60.9               |
| Lymphocyte         | $-1.01 \times 10^{-6}$         | 1.5                       | 0.001                  | 1368.5             |
| MCH                | $7.098 \times 10^{-6}$         | 0.6                       | 0.007                  | 60.9               |
| MCHC               | $-2.00 \times 10^{-6}$         | 0.9                       | 0.01                   | 58.7               |
| MCV                | $1.71 \times 10^{-5}$          | 0.6                       | 0.01                   | 70                 |
| Monocyte           | 0.002                          | 0.1                       | 0.017                  | 349.4              |
| Neutrophil         | 0.038                          | 0.1                       | 0.071                  | 66.5               |
| PLC                | 0.609                          | 0.9                       | 0.154                  | 112.5              |
| RBC                | $9.650 \times 10^{-5}$         | 0.9                       | 0.028                  | 49.7               |
| SBP                | 0.001                          | 0.6                       | 0.019                  | 166.8              |
| Triglyceride       | 0.348                          | 0.0                       | 0.247                  | 164.7              |
| Urate              | 0.252                          | 0.5                       | 0.24                   | 39.9               |
| WBC                | 0.0002                         | 0.1                       | 0.01                   | 347.8              |

**Table S19: Replication of effect sizes and posterior inclusion probabilities (PIPs) among ten independent subsamples of the UK Biobank European ancestry cohort using SuSiE<sup>65</sup> for fine-mapping.** The sample size of the ten independent, non-overlapping subsamples of the UK Biobank European ancestry cohort was set to 10,000. For the 1,895,051 SNPs that were analyzed in every European ancestry cohort subsample (Table S1) and the effect sizes and PIPs (columns 2 and 4, respectively) generated using the SuSiE method<sup>65</sup>, we calculated the median correlation coefficient between all possible pairwise comparisons (10 choose 2) of the European ancestry cohort subsamples. Column 3 reports the mean number of SNPs with effect sizes greater than 0.1 across all ten European ancestry cohort subsamples for each trait. Column 5 reports the mean number of SNPs with a posterior inclusion probability greater than 0.01 across the ten European ancestry cohort subsamples for each trait.

| Trait Name or Code | Number of Shared Effect Sizes $> 0.1$ | Median Effect Size Correlation | African Effect Sizes $> 0.1$ | European Effect Sizes $> 0.1$ (Mean) | Number of Shared PIPs $> 0.01$ | Median PIP Correlation | African PIPs $> 0.01$ | European PIPs $> 0.01$ (Mean) |
|--------------------|---------------------------------------|--------------------------------|------------------------------|--------------------------------------|--------------------------------|------------------------|-----------------------|-------------------------------|
| BMI                | 0                                     | $5.12 \times 10^{-5}$          | 2                            | 0                                    | 1                              | 0.027                  | 1206                  | 8.9                           |
| Basophil           | 0                                     | $-3.01 \times 10^{-5}$         | 0                            | 0                                    | 0                              | 0.001                  | 403                   | 40.3                          |
| CRP                | 0                                     | $-3.68 \times 10^{-6}$         | 0                            | 0.4                                  | 0                              | $5.88 \times 10^{-5}$  | 95                    | 33.6                          |
| Cholesterol        | 1                                     | 0.5                            | 1                            | 0.9                                  | 5                              | 0.467                  | 1144                  | 8.4                           |
| DBP                | 0                                     | $1.58 \times 10^{-5}$          | 10                           | 0.3                                  | 0                              | 0.008                  | 1249                  | 20.3                          |
| EGFR               | 0                                     | $2.41 \times 10^{-6}$          | 1                            | 0                                    | 0                              | 0.001                  | 984                   | 24.7                          |
| Eosinophil         | 0                                     | $-1.97 \times 10^{-5}$         | 0                            | 0                                    | 0                              | 0.003                  | 979                   | 29.3                          |
| HBA1C              | 0                                     | $-1.15 \times 10^{-6}$         | 5                            | 0.2                                  | 0                              | 0.004                  | 959                   | 6.5                           |
| HDL                | 0                                     | 0.014                          | 0                            | 0.1                                  | 2                              | 0.014                  | 31                    | 11.6                          |
| Height             | 0                                     | $-1.22 \times 10^{-5}$         | 19                           | 0.7                                  | 0                              | 0.003                  | 208                   | 33.7                          |
| Hematocrit         | 0                                     | $-1.14 \times 10^{-5}$         | 1                            | 0                                    | 0                              | 0.016                  | 199                   | 12.2                          |
| Hemoglobin         | 0                                     | $-6.31 \times 10^{-6}$         | 1                            | 0                                    | 0                              | 0.022                  | 568                   | 12.5                          |
| LDL                | 1                                     | 0.674                          | 1                            | 1                                    | 8                              | 0.497                  | 995                   | 13.5                          |
| Lymphocyte         | 0                                     | $2.71 \times 10^{-5}$          | 0                            | 0                                    | 1                              | 0.001                  | 60                    | 115.5                         |
| MCH                | 0                                     | $1.14 \times 10^{-5}$          | 1                            | 0.2                                  | 0                              | 0.005                  | 1332                  | 11.8                          |
| MCHC               | 0                                     | $-1.56 \times 10^{-6}$         | 1                            | 0.2                                  | 0                              | 0.008                  | 646                   | 13.6                          |
| MCV                | 0                                     | $2.58 \times 10^{-6}$          | 1                            | 0.2                                  | 0                              | 0.005                  | 917                   | 11.8                          |
| Monocyte           | 0                                     | $-2.44 \times 10^{-5}$         | 0                            | 0                                    | 2                              | 0.002                  | 2215                  | 27.7                          |
| Neutrophil         | 0                                     | -0.0001                        | 1                            | 0                                    | 0                              | 0.001                  | 2386                  | 10.2                          |
| PLC                | 0                                     | -0.017                         | 1                            | 0.6                                  | 3                              | 0.035                  | 2088                  | 13.7                          |
| RBC                | 0                                     | $-6.35 \times 10^{-6}$         | 1                            | 0.1                                  | 0                              | -0.002                 | 3                     | 12.7                          |
| SBP                | 0                                     | $4.31 \times 10^{-5}$          | 13                           | 0.1                                  | 0                              | 0.008                  | 1133                  | 20                            |
| Triglyceride       | 0                                     | 0.004                          | 0                            | 0.1                                  | 8                              | 0.009                  | 2231                  | 25.6                          |
| Urate              | 1                                     | 0.01                           | 2                            | 0.3                                  | 3                              | 0.051                  | 334                   | 9.8                           |
| WBC                | 0                                     | -0.0001                        | 1                            | 0                                    | 5                              | 0.0006                 | 2862                  | 48.3                          |

**Table S20: Replication of effect sizes and posterior inclusion probabilities (PIPs) between the UK Biobank African ancestry cohort and ten independent subsamples of the UK Biobank European ancestry cohort using SuSiE<sup>65</sup> for fine-mapping.** Each of the ten independent, non-overlapping subsamples of the UK Biobank European ancestry cohort was set to be equal in size to the sample size of the African ancestry cohort ( $N = 4,967$ ). Table S1. Column headers containing “(mean)” indicate a mean is generated averaging over the ten independent European ancestry cohort subsamples. For the 496,997 SNPs that were analyzed in both the African ancestry cohort and every European ancestry cohort subsample, we compared the SuSiE<sup>65</sup> effect size estimates and PIPs. For both effect sizes and PIPs, the median correlation coefficient between the African ancestry cohort and the pairwise comparison to each European ancestry cohort subsample is reported in the third and seventh columns, respectively. Column 3 reports the total number of SNPs with effect sizes greater than 0.1 in the African cohort. Column 4 gives the mean number of effect sizes greater than 0.1 in the European ancestry cohort subsamples for each trait. We performed the same comparison for the PIPs using a threshold of 0.01. Column 2 reports the number of SNPs that surpassed an effect size of 0.1 in both the African ancestry cohort and at least one of the European ancestry cohort subsamples. Column 6 reports the number of SNPs that surpasses a PIP of 0.01 in the African ancestry cohort and at least one European ancestry cohort subsample.

| Trait Name or Code | Number of Shared Effect Sizes > 0.1 | Median Effect Size Correlation | South Asian Effect Sizes > 0.1 | European Effect Sizes > 0.1 (Mean) | Number of Shared PIPs > 0.01 | Median PIP Correlation | South Asian PIPs > 0.01 | European PIPs > 0.01 (Mean) |
|--------------------|-------------------------------------|--------------------------------|--------------------------------|------------------------------------|------------------------------|------------------------|-------------------------|-----------------------------|
| BMI                | 0                                   | $7.07 \times 10^{-5}$          | 1                              | 0                                  | 0                            | 0.0173                 | 180                     | 18                          |
| Basophil           | 0                                   | $-1.10 \times 10^{-5}$         | 0                              | 0                                  | 0                            | 0.0008                 | 210                     | 78.4                        |
| CRP                | 0                                   | 0.0309                         | 0                              | 0.4                                | 17                           | 0.121                  | 181                     | 64.7                        |
| Cholesterol        | 0                                   | 0.004                          | 0                              | 0.9                                | 2                            | 0.0127                 | 20                      | 9                           |
| DBP                | 0                                   | $-2.12 \times 10^{-5}$         | 0                              | 0.6                                | 0                            | 0.013                  | 115                     | 40                          |
| EGFR               | 0                                   | $-1.26 \times 10^{-5}$         | 0                              | 0                                  | 0                            | $5.12 \times 10^{-5}$  | 452                     | 44.2                        |
| Eosinophil         | 0                                   | $2.16 \times 10^{-5}$          | 0                              | 0                                  | 0                            | 0.006                  | 63                      | 69.1                        |
| HBA1C              | 0                                   | $-3.33 \times 10^{-5}$         | 2                              | 0.3                                | 0                            | 0.011                  | 133                     | 13.3                        |
| HDL                | 0                                   | 0.525                          | 0                              | 0.1                                | 3                            | 0.505                  | 78                      | 12.2                        |
| Height             | 0                                   | $-2.13 \times 10^{-5}$         | 12                             | 1.1                                | 1                            | 0.001                  | 754                     | 66.8                        |
| Hematocrit         | 0                                   | $-4.78 \times 10^{-6}$         | 1                              | 0.3                                | 0                            | $6.24 \times 10^{-5}$  | 24                      | 17.4                        |
| Hemoglobin         | 0                                   | $-4.19 \times 10^{-6}$         | 1                              | 0.3                                | 0                            | 0.011                  | 19                      | 16.1                        |
| LDL                | 0                                   | 0.491                          | 1                              | 1                                  | 14                           | 0.386                  | 44                      | 15.6                        |
| Lymphocyte         | 0                                   | $-4.40 \times 10^{-6}$         | 0                              | 1.1                                | 0                            | 0.0001                 | 113                     | 343.1                       |
| MCH                | 0                                   | $5.29 \times 10^{-6}$          | 2                              | 0.5                                | 0                            | 0.008                  | 78                      | 22.3                        |
| MCHC               | 0                                   | $-5.77 \times 10^{-6}$         | 1                              | 0.9                                | 0                            | 0.007                  | 45                      | 20.3                        |
| MCV                | 0                                   | $1.74 \times 10^{-5}$          | 3                              | 0.5                                | 0                            | 0.005                  | 81                      | 26.3                        |
| Monocyte           | 0                                   | $-4.05 \times 10^{-6}$         | 0                              | 0.1                                | 0                            | 0.001                  | 156                     | 76.8                        |
| Neutrophil         | 0                                   | 0.221                          | 0                              | 0                                  | 16                           | 0.172                  | 70                      | 25.7                        |
| PLC                | 0                                   | 0.577                          | 0                              | 0.8                                | 1                            | 0.679                  | 126                     | 22.7                        |
| RBC                | 0                                   | $2.79 \times 10^{-6}$          | 0                              | 0.3                                | 0                            | -0.011                 | 41                      | 20.9                        |
| SBP                | 0                                   | -0.0004                        | 0                              | 0.3                                | 0                            | 0.037                  | 116                     | 43.2                        |
| Triglyceride       | 0                                   | 0.158                          | 0                              | 0                                  | 53                           | 0.173                  | 189                     | 46.4                        |
| Urate              | 0                                   | 0.137                          | 1                              | 0.4                                | 6                            | 0.150                  | 52                      | 15.8                        |
| WBC                | 0                                   | 0.001                          | 0                              | 0                                  | 18                           | 0.008                  | 52                      | 93                          |

**Table S21: Replication of effect sizes and posterior inclusion probabilities (PIPs) between the UK Biobank South Asian ancestry cohort and ten independent subsamples of the UK Biobank European ancestry cohort using SuSiE<sup>65</sup> for fine-mapping.** Each of the ten independent, non-overlapping subsamples of the UK Biobank European ancestry cohort was set to be equal in size to the sample size of the South Asian ancestry cohort ( $N = 5,660$ ), **Table S1**. Column headers containing "(mean)" indicate a mean is generated averaging over the ten independent European ancestry cohort subsamples. For the 863,569 SNPs that were analyzed in both the South Asian ancestry cohort and every European ancestry cohort subsample, we compared the SuSiE<sup>65</sup> effect size estimates and PIPs. For both effect sizes and PIPs, the median correlation coefficient between the South Asian ancestry cohort and the pairwise comparison to each European ancestry cohort subsample is reported in the third and seventh columns, respectively. Column 3 reports the total number of SNPs with effect sizes greater than 0.1 in the South Asian cohort. Column four gives the mean number of effect sizes greater than 0.1 in the European ancestry cohort subsamples for each trait. We performed the same comparison for the PIPs using a threshold of 0.01. Column 2 reports the number of SNPs that surpassed an effect size of 0.1 in both the South Asian ancestry cohort and at least one of the European ancestry cohort subsamples. Column 6 reports the number of SNPs that surpasses a PIP of 0.01 in the South Asian ancestry cohort and at least one European ancestry cohort subsample.



| Trait Name or Code | Cochran's Q among European subsamples ( <i>p</i> -value) | Cochran's Q between African and European subsamples ( <i>p</i> -value) | Cochran's Q between South Asian and European subsamples ( <i>p</i> -value) |
|--------------------|----------------------------------------------------------|------------------------------------------------------------------------|----------------------------------------------------------------------------|
| Height             | 641.91 (2.10e-132)                                       | 395.01 (1.09e-78)                                                      | 4036.8(0.0)                                                                |
| BMI                | 316.69 (7.48e-63)                                        | 6,916.75 (0.0)                                                         | 1076.76 (5.39e-225)                                                        |
| MCV                | 160.05 (7.25e-30)                                        | 11,489.97 (0.0)                                                        | 155.06 (3.37e-28)                                                          |
| PLC                | 51.29 (6.15e-08)                                         | 13,141.96 (0.0)                                                        | 386.07 (8.67e-77)                                                          |
| DBP                | 254.32 (1.22e-49)                                        | 9,725.02 (0.0)                                                         | 241.54 (3.26e-46)                                                          |
| SBP                | 126.20 (7.16e-23)                                        | 1,0479.39 (0.0)                                                        | 286.38 (1.17e-55)                                                          |
| WBC                | 1458.39 (1.87e-308)                                      | 20,351.80 (0.0)                                                        | 374.37 (2.65e-74)                                                          |
| RBC                | 102.75 (4.36e-18)                                        | 29.34 (0.001)                                                          | 153.12 (8.51e-28)                                                          |
| Hemoglobin         | 114.35 (1.91e-20)                                        | 5,022.47 (0.0)                                                         | 76.74 (2.18e-12)                                                           |
| Hematocrit         | 149.67 (1.03e-27)                                        | 1,205.09 (1.15e-252)                                                   | 93.03 (1.34e-15)                                                           |
| MCH                | 90.29 (1.42e-15)                                         | 14,366.33 (0.0)                                                        | 158.25 (7.44e-29)                                                          |
| MCHC               | 260.58 (5.80e-51)                                        | 14,674.80 (0.0)                                                        | 112.79 (1.46e-19)                                                          |
| Lymphocyte         | 3105.01 (0.0)                                            | 396.931 (4.23e-79)                                                     | 1,062.61 (6.05e-222)                                                       |
| Monocyte           | 811.20 (8.26e-169)                                       | 9,186.25 (0.0)                                                         | 433.65 (6.41e-87)                                                          |
| Neutrophil         | 95.72 (1.15e-16)                                         | 24,580.86 (0.0)                                                        | 141.67 (1.92e-25)                                                          |
| Eosinophil         | 4,919.90 (0.0)                                           | 3,615.16 (0.0)                                                         | 873.53 (3.16e-181)                                                         |
| Basophil           | 833.69 (1.18e-173)                                       | 1,879.65 (0.0)                                                         | 541.10 (7.19e-110)                                                         |
| Urate              | 73.29 (3.44e-12)                                         | 93.37 (1.15e-15)                                                       | 110.03 (5.26e-19)                                                          |
| HBA1C              | 100.17 (1.45e-17)                                        | 14,073.79 (0.0)                                                        | 639.21 (6.93e-131)                                                         |
| EGFR               | 361.48 (2.23e-72)                                        | 11,478.25 (0.0)                                                        | 3,012.83 (0.0)                                                             |
| CRP                | 288.30 (7.91e-57)                                        | 117.51 (1.62e-20)                                                      | 509.40 (4.33e-103)                                                         |
| Triglyceride       | 138.42 (2.19e-25)                                        | 9,133.51 (0.0)                                                         | 564.80 (6.09e-115)                                                         |
| HDL                | 175.95 (3.54e-33)                                        | 30.98 (0.00059)                                                        | 292.39 (6.32e-57)                                                          |
| LDL                | 101.33 (8.45e-18)                                        | 3,935.88 (0.0)                                                         | 86.14 (3.12e-14)                                                           |
| Cholesterol        | 158.82 (1.30e-29)                                        | 5,919.75 (0.0)                                                         | 43.87 (3.47e-06)                                                           |

**Table S22: Cochran's Q Statistics and *p*-values for comparisons of SuSiE<sup>65</sup> for fine-mapping posterior inclusion probabilities among UKB ancestry cohorts.** We calculated the Cochran's Q statistic for posterior inclusion probabilities > 0.01 for each pairwise comparison of European cohort subsamples. We reported the median value of these comparisons for each trait. We then calculated the median Cochran's Q when comparing the ten European subsamples to the African and South Asian ancestry cohorts in the UK Biobank.

| False discovery rate  |                 |                |                         |                 |                |
|-----------------------|-----------------|----------------|-------------------------|-----------------|----------------|
| gene- $\epsilon$      |                 |                |                         |                 |                |
| Structured Population |                 |                | Unstructured Population |                 |                |
| Sparsity              | 0.01            | 0.1            |                         | 0.01            | 0.1            |
| $h^2 = 0.2$           | 0 (0)           | 0.010 (0.044)  | $h^2 = 0.2$             | 0.418 (0.183)   | 0.618 (0.085)  |
| $h^2 = 0.6$           | 0.020 (0.141)   | 0 (0)          | $h^2 = 0.6$             | 0.097 (0.284)   | 0.327 (0.245)  |
| GWAS                  |                 |                |                         |                 |                |
| Sparsity              | 0.01            | 0.1            | Sparsity                | 0.01            | 0.1            |
| $h^2 = 0.2$           | 0.447 (0.153)   | 0.636 (0.075)  | $h^2 = 0.2$             | 0.01 (0.1)      | 0.001 (0.011)  |
| $h^2 = 0.6$           | 0.127 (0.324)   | 0.38 (0.241)   | $h^2 = 0.6$             | 0.057 (0.227)   | 0 (0)          |
| Power                 |                 |                |                         |                 |                |
| gene- $\epsilon$      |                 |                |                         |                 |                |
| Structured Population |                 |                | Unstructured Population |                 |                |
| Sparsity              | 0.01            | 0.1            | Sparsity                | 0.01            | 0.1            |
| $h^2 = 0.2$           | 0.023 (0.043)   | 0.045 (0.104)  | $h^2 = 0.2$             | 0.002 (0.038)   | 0.392 (0.108)  |
| $h^2 = 0.6$           | 0.0006 (0.0006) | 0.0002 (0.002) | $h^2 = 0.6$             | 0.0006 (0.0006) | 0.0004 (0.002) |
| GWAS                  |                 |                |                         |                 |                |
| Sparsity              | 0.01            | 0.1            | Sparsity                | 0.01            | 0.1            |
| $h^2 = 0.2$           | 0.154 (0.038)   | 0.397 (0.052)  | $h^2 = 0.2$             | 0.010 (0.038)   | 0.001 (0.108)  |
| $h^2 = 0.6$           | 0.0002 (0.0008) | 0.005 (0.004)  | $h^2 = 0.6$             | 0.057 (0.0006)  | 0 (0.002)      |

**Table S23: Performance of the standard GWA framework and gene- $\epsilon$  in simulations of a small cohort with  $N = 2,000$  individuals.** Mean false discovery rate and power for 100 simulations of a population under each parameter set shown in [Figure S8](#). Standard errors are given in parentheses.

| Gene          | African-American       | European               | South Asian           | East Asian             | AIAN                  | Hispanic and Latin American |
|---------------|------------------------|------------------------|-----------------------|------------------------|-----------------------|-----------------------------|
| <i>RDH13</i>  | $4.14 \times 10^{-10}$ | $9.95 \times 10^{-1}$  | $8.80 \times 10^{-2}$ | $1.76 \times 10^{-6}$  | 1                     | $7.88 \times 10^{-1}$       |
| <i>AGPAT5</i> | 1                      | $1.30 \times 10^{-6}$  | $7.83 \times 10^{-1}$ | $5.00 \times 10^{-1}$  | $7.33 \times 10^{-8}$ | 1                           |
| <i>GP6</i>    | $7.20 \times 10^{-10}$ | $9.93 \times 10^{-1}$  | $1.47 \times 10^{-1}$ | $9.07 \times 10^{-7}$  | 1                     | $6.92 \times 10^{-1}$       |
| <i>ALDH2</i>  | 1                      | $1.00 \times 10^{-20}$ | $1.13 \times 10^{-2}$ | $1.00 \times 10^{-20}$ | 1                     | 1                           |
| <i>RAB8A</i>  | $9.57 \times 10^{-1}$  | $1.00 \times 10^{-20}$ | 1                     | $5.76 \times 10^{-6}$  | 1                     | $9.97 \times 10^{-1}$       |
| <i>CUX2</i>   | 1                      | $5.13 \times 10^{-7}$  | $1.16 \times 10^{-1}$ | $3.44 \times 10^{-11}$ | 1                     | 1                           |
| <i>ACAD10</i> | 1                      | $1.47 \times 10^{-10}$ | $1.10 \times 10^{-2}$ | $2.00 \times 10^{-10}$ | 1                     | 1                           |

**Table S24: Gene-level association  $p$ -values for seven genes associated with platelet count in at last two ancestry cohorts.** Of the 65 genes that were associated with platelet count in at least two ancestry cohorts, these seven contained previously identified SNP-level associations in studies submitted to the GWAS Catalog. Previous associations in the GWAS Catalog are discussed in the Supplemental Information. Ancestry-specific Bonferroni corrected significance thresholds for gene-level association analysis of platelet count are shown in [Table S16](#)

| Gene           | African or African-American                                                 | European                                                                    | East Asian         | Hispanic                                                                    |
|----------------|-----------------------------------------------------------------------------|-----------------------------------------------------------------------------|--------------------|-----------------------------------------------------------------------------|
| <i>ANGPTL4</i> | <a href="#">42</a>                                                          | <a href="#">28</a>                                                          | NA                 | <a href="#">28</a>                                                          |
| <i>APOA1</i>   | <a href="#">21</a>                                                          | <a href="#">21</a>                                                          | NA                 | <a href="#">21</a>                                                          |
| <i>APOA4</i>   | NA                                                                          | <a href="#">22</a>                                                          | NA                 | NA                                                                          |
| <i>APOA5</i>   | <a href="#">24</a>                                                          | <a href="#">23</a> <a href="#">26</a>                                       | <a href="#">27</a> | <a href="#">24</a>                                                          |
| <i>APOB</i>    | <a href="#">29</a>                                                          | <a href="#">29</a>                                                          | NA                 | <a href="#">29</a>                                                          |
| <i>APOC1</i>   | <a href="#">21</a>                                                          | <a href="#">22</a>                                                          | NA                 | <a href="#">21</a>                                                          |
| <i>APOC2</i>   | <a href="#">24</a>                                                          | <a href="#">24</a>                                                          | NA                 | <a href="#">24</a>                                                          |
| <i>APOC3</i>   | <a href="#">21</a>                                                          | <a href="#">21</a> <a href="#">22</a>                                       | NA                 | <a href="#">21</a>                                                          |
| <i>APOC4</i>   | <a href="#">22</a>                                                          | <a href="#">22</a>                                                          | NA                 | <a href="#">22</a>                                                          |
| <i>APOE</i>    | <a href="#">22</a>                                                          | <a href="#">22</a> <a href="#">24</a>                                       | NA                 | <a href="#">22</a>                                                          |
| <i>CETP</i>    | <a href="#">21</a>                                                          | <a href="#">22</a>                                                          | NA                 | <a href="#">21</a>                                                          |
| <i>LMF1</i>    | NA                                                                          | <a href="#">22</a>                                                          | NA                 | NA                                                                          |
| <i>LPL</i>     | <a href="#">21</a>                                                          | <a href="#">22</a>                                                          | <a href="#">27</a> | <a href="#">21</a>                                                          |
| <i>PCSK6</i>   | <a href="#">42</a>                                                          | <a href="#">22</a>                                                          | NA                 | <a href="#">42</a>                                                          |
| <i>PCSK7</i>   | <a href="#">24</a>                                                          | <a href="#">24</a>                                                          | <a href="#">27</a> | <a href="#">24</a>                                                          |
| <i>PLTP</i>    | <a href="#">21</a> <a href="#">24</a> <a href="#">28</a> <a href="#">29</a> | <a href="#">21</a> <a href="#">22</a> <a href="#">28</a> <a href="#">31</a> | NA                 | <a href="#">21</a> <a href="#">24</a> <a href="#">28</a> <a href="#">29</a> |

**Table S25: Genes shown in Figure 3 as associated with triglyceride levels are supported by publications in the GWAS Catalog.** Each of the genes listed is present in the significantly mutated subnetworks identified using Hierarchical HotNet<sup>50</sup> as enriched for associations with triglyceride levels in the European, East Asian, or Native Hawaiian ancestry cohorts. We mapped SNP-level associations from the GWAS Catalog to the 29 genes present in the significantly mutated subnetworks shown in Figure 3 (using the gene list provided by Gusev et al.<sup>62</sup>) to generate the results for the 16 genes shown here.

| Gene           | African-American (PAGE) | European               | South Asian           | East Asian             | Native Hawaiian        | Hispanic and Latin American |
|----------------|-------------------------|------------------------|-----------------------|------------------------|------------------------|-----------------------------|
| <i>APOA1</i>   | $4.99 \times 10^{-1}$   | $1.00 \times 10^{-20}$ | $9.91 \times 10^{-1}$ | $1.00 \times 10^{-20}$ | $7.52 \times 10^{-1}$  | $4.99 \times 10^{-1}$       |
| <i>APOA4</i>   | $4.99 \times 10^{-1}$   | $1.00 \times 10^{-20}$ | $2.51 \times 10^{-5}$ | $1.00 \times 10^{-20}$ | $9.15 \times 10^{-1}$  | $4.99 \times 10^{-1}$       |
| <i>APOA5</i>   | $4.99 \times 10^{-1}$   | $1.42 \times 10^{-11}$ | $1.60 \times 10^{-6}$ | $9.95 \times 10^{-1}$  | $3.67 \times 10^{-12}$ | $4.99 \times 10^{-1}$       |
| <i>APOC3</i>   | $4.99 \times 10^{-1}$   | $1.00 \times 10^{-20}$ | $9.82 \times 10^{-1}$ | $9.83 \times 10^{-1}$  | $3.05 \times 10^{-15}$ | $4.99 \times 10^{-1}$       |
| <i>APOE</i>    | $4.99 \times 10^{-1}$   | $1.00 \times 10^{-20}$ | $8.65 \times 10^{-1}$ | $1.00 \times 10^{-20}$ | 1                      | 1                           |
| <i>PLTP</i>    | $4.99 \times 10^{-1}$   | $4.29 \times 10^{-9}$  | $9.66 \times 10^{-1}$ | $6.66 \times 10^{-15}$ | $1.00 \times 10^{-2}$  | $4.99 \times 10^{-1}$       |
| <i>LPL</i>     | $4.99 \times 10^{-1}$   | $4.08 \times 10^{-13}$ | $3.00 \times 10^{-3}$ | $1.00 \times 10^{-20}$ | $6.59 \times 10^{-1}$  | $4.99 \times 10^{-1}$       |
| <i>ANGPTL3</i> | $4.99 \times 10^{-1}$   | $8.86 \times 10^{-8}$  | $2.00 \times 10^{-3}$ | $1.00 \times 10^{-20}$ | $4.00 \times 10^{-3}$  | 1                           |
| <i>ANGPTL4</i> | $4.99 \times 10^{-1}$   | $1.00 \times 10^{-20}$ | $9.78 \times 10^{-1}$ | $9.99 \times 10^{-1}$  | $9.89 \times 10^{-1}$  | 1                           |
| <i>APOC1</i>   | $4.99 \times 10^{-1}$   | $1.67 \times 10^{-16}$ | $4.99 \times 10^{-1}$ | $1.00 \times 10^{-20}$ | $9.81 \times 10^{-1}$  | $4.99 \times 10^{-1}$       |
| <i>APOC2</i>   | $4.99 \times 10^{-1}$   | $3.57 \times 10^{-13}$ | $7.71 \times 10^{-1}$ | $1.11 \times 10^{-1}$  | $9.11 \times 10^{-1}$  | $4.99 \times 10^{-1}$       |
| <i>APOC4</i>   | $4.99 \times 10^{-1}$   | $3.72 \times 10^{-13}$ | $7.36 \times 10^{-1}$ | $2.58 \times 10^{-14}$ | $9.73 \times 10^{-1}$  | $4.99 \times 10^{-1}$       |
| <i>APOB</i>    | $4.99 \times 10^{-1}$   | $1.00 \times 10^{-20}$ | $9.99 \times 10^{-1}$ | $7.32 \times 10^{-12}$ | $1.00 \times 10^{-3}$  | 1                           |
| <i>LMF1</i>    | $9.98 \times 10^{-1}$   | $8.03 \times 10^{-7}$  | 1                     | $3.21 \times 10^{-2}$  | $3.79 \times 10^{-5}$  | $9.98 \times 10^{-1}$       |
| <i>APOL1</i>   | $4.99 \times 10^{-1}$   | $5.30 \times 10^{-2}$  | $6.40 \times 10^{-2}$ | 1                      | $8.89 \times 10^{-11}$ | $4.99 \times 10^{-1}$       |
| <i>HBA1</i>    | $4.99 \times 10^{-1}$   | $3.75 \times 10^{-5}$  | $9.99 \times 10^{-1}$ | $4.51 \times 10^{-1}$  | $2.46 \times 10^{-10}$ | 1                           |
| <i>HBA2</i>    | $4.99 \times 10^{-1}$   | $1.30 \times 10^{-5}$  | $9.99 \times 10^{-1}$ | $4.51 \times 10^{-1}$  | $3.93 \times 10^{-10}$ | $4.99 \times 10^{-1}$       |
| <i>B4GALT3</i> | $4.99 \times 10^{-1}$   | $6.80 \times 10^{-2}$  | $7.21 \times 10^{-1}$ | $4.99 \times 10^{-1}$  | $1.23 \times 10^{-6}$  | 1                           |
| <i>KLK8</i>    | 1                       | 1                      | $1.62 \times 10^{-6}$ | $9.89 \times 10^{-1}$  | $1.00 \times 10^{-3}$  | 1                           |
| <i>PNLIP</i>   | $4.99 \times 10^{-1}$   | $9.99 \times 10^{-1}$  | $9.26 \times 10^{-1}$ | $7.75 \times 10^{-1}$  | $1.00 \times 10^{-3}$  | $4.99 \times 10^{-1}$       |
| <i>WNT4</i>    | $4.99 \times 10^{-1}$   | $9.61 \times 10^{-1}$  | $9.99 \times 10^{-1}$ | $4.99 \times 10^{-1}$  | $3.29 \times 10^{-5}$  | $4.99 \times 10^{-1}$       |
| <i>BACE1</i>   | $4.99 \times 10^{-1}$   | $5.55 \times 10^{-17}$ | $2.20 \times 10^{-2}$ | $9.99 \times 10^{-16}$ | $6.69 \times 10^{-1}$  | $4.99 \times 10^{-1}$       |
| <i>CETP</i>    | $4.99 \times 10^{-1}$   | $1.00 \times 10^{-3}$  | $9.99 \times 10^{-1}$ | $1.41 \times 10^{-6}$  | $9.99 \times 10^{-1}$  | $4.99 \times 10^{-1}$       |
| <i>PCSK6</i>   | $4.99 \times 10^{-1}$   | 1                      | $9.99 \times 10^{-1}$ | $1.83 \times 10^{-5}$  | $1.00 \times 10^{-3}$  | $4.99 \times 10^{-1}$       |
| <i>PCSK7</i>   | $4.99 \times 10^{-1}$   | $1.66 \times 10^{-8}$  | $9.97 \times 10^{-1}$ | $1.00 \times 10^{-20}$ | $9.99 \times 10^{-1}$  | $4.99 \times 10^{-1}$       |
| <i>LCAT</i>    | $4.99 \times 10^{-1}$   | $5.00 \times 10^{-1}$  | 1                     | $6.24 \times 10^{-3}$  | $4.38 \times 10^{-1}$  | $4.99 \times 10^{-1}$       |
| <i>APOF</i>    | $4.99 \times 10^{-1}$   | $5.78 \times 10^{-1}$  | $7.79 \times 10^{-1}$ | $4.10 \times 10^{-3}$  | $9.64 \times 10^{-1}$  | $4.99 \times 10^{-1}$       |
| <i>TYRO3</i>   | $4.99 \times 10^{-1}$   | $9.28 \times 10^{-1}$  | $9.99 \times 10^{-1}$ | $1.20 \times 10^{-2}$  | $8.57 \times 10^{-1}$  | $4.99 \times 10^{-1}$       |

**Table S26: Gene- $\epsilon$   $p$ -values for the 28 genes present in the significantly mutated subnetworks associated with triglyceride level in the European, East Asian, and Native Hawaiian cohorts.** Each of these genes is present in Figure 3 which depicts the overlapping significantly mutated subnetworks identified using Hierarchical HoNet<sup>50</sup> identified in an analysis of triglyceride levels in the European, East Asian, and Native Hawaiian cohorts. Known SNP-level associations identified within the bounds of these genes in previous studies submitted to the GWAS Catalog are discussed in the Supplemental Information. Ancestry-specific Bonferroni corrected significance thresholds for gene-level association analysis of triglyceride levels are shown in Table S16

## Supplemental Subjects and Methods

### UK Biobank Data

We downloaded individual genotype data using the UK Biobank's (UKB) `ukbgene` resource, <https://biobank.ctsu.ox.ac.uk/crystal/download.cgi>. European individuals from the UK Biobank data were selected using the self-identified ancestry (data field 21000) using values outlined at <https://biobank.ctsu.ox.ac.uk/crystal/field.cgi?id=21000>. Using the relatedness file provided by the UK Biobank, one individual from each related pair was then randomly removed. This process was repeated for individuals whose self-identified ancestry was South Asian.

We performed unsupervised genome-wide ancestry estimation using ADMIXTURE by setting  $K = 3$ <sup>66</sup> on the self-identified African ancestry cohort. We also included YRI and CEU individuals in the ADMIXTURE runs from the 1000 Genomes Project, to identify the ancestry components corresponding to African and European ancestry. We removed individuals containing less than 5% membership in the African ancestry component and more than 5% membership in the third component, which corresponds to American Indian/Alaskan Native (AIAN) ancestry (??). We downloaded imputed SNP data from the UK Biobank for all remaining individuals and removed SNPs with an information score below 0.8. Information scores for each SNP are provided by the UK Biobank (<http://biobank.ctsu.ox.ac.uk/crystal/refer.cgi?id=1967>). The remaining genotype and high-quality imputed SNPs were put through a stringent quality control pipeline in each ancestry cohort to obtain cohort-specific SNPs to be used for further analysis as detailed in the main text (detailed below).

We performed the following quality control filters in the European, South Asian, and African cohorts from the UK Biobank (Application number 22419). Genotype data for 488,377 individuals in the UK Biobank were downloaded using the UK Biobank's `ukbgene` (<https://biobank.ctsu.ox.ac.uk/crystal/download.cgi>) tool and converted using the provided `ukbconv` tool (<https://biobank.ctsu.ox.ac.uk/crystal/refer.cgi?id=149660>). Phenotype data was also downloaded for those same individuals using the `ukbgene` tool. Individuals identified by the UK Biobank to have high heterozygosity, excessive relatedness, or aneuploidy were removed (1,550 individuals). After then separating individuals into self-identified ancestral groups using data field 21000. Within these cohorts, unrelated individuals were then selected by randomly selecting an individual from each pair of related individuals. This resulted in 349,469 European individuals, 5,716 South Asian individuals, and 4,967 African individuals.

Genotype quality control was then performed on each cohort separately using the following steps. All structural variants were first removed, leaving only single nucleotide polymorphisms in the genotype data. Next, all AT/CG SNPs were removed to avoid possible confounding due to sequencing errors. Then, SNPs

183 with minor allele frequency less than 1% were removed using the plink2<sup>67</sup> `--maf 0.01`. We then removed  
184 all SNPs found to be in Hardy-Weinberg equilibrium, using the plink `--hwe 0.000001` flag to remove all  
185 SNPs with a Fisher’s exact test  $p$ -value  $> 10^{-6}$ . Finally, all SNPs with missingness greater than 1% were  
186 removed using the plink `--mind 0.01` flag.

187 Finally, we note that the number of filtered SNPs in the African cohort is smaller than the number  
188 of filtered SNPs in the European cohort. These results stand in contrast to expectation about number of  
189 independent variants in these two populations. We believe this to be due to ascertainment bias on the  
190 genotyping array.

### 191 **Biobank Japan Data**

192 We downloaded summary statistics for 25 quantitative traits from the Biobank Japan (BBJ) website (<http://jenger.riken.jp/en/result>)<sup>59,61,68</sup>. The sample descriptions and number of SNPs included in our  
193 analyses are given in [Table S5](#). The number of SNPs included in the analysis of each trait represent those  
194 SNPs that: (i) contained an rsid number that could be mapped to the hg19 genome build, (ii) overlapped  
195 with SNPs contained within the 1000 Genomes Project phase 3 genotype data, and (iii) had a minor allele  
196 frequency greater than 0.01 in Japanese (JPT) individuals in the 1000 Genomes Project. We used the 1000  
197 Genomes phase 3 data from 93 JPT individuals to estimate the linkage disequilibrium (LD) between SNPs  
198 in BioBank Japan for which we had the summary statistic data; LD was estimated separately for each of  
199 the 25 quantitative traits using the trait specific SNP arrays. LD estimates were used in the calculation of  
200 regional association statistics.  
201

### 202 **Population Architecture using Genomics and Epidemiology (PAGE) Study Data**

203 Summary statistics for genotyped and imputed SNPs in five admixed populations were downloaded from the  
204 Population Architecture using Genomics and Epidemiology (PAGE)<sup>69</sup> with permission granted via approval  
205 of manuscript proposal. We included summary statistics for up to 14 quantitative traits for African-American,  
206 Hispanic and Latin American, Native Hawaiian, American Indian/Alaska Native, and Asian ancestry cohorts  
207 when available. All AT/CG SNPs were omitted, and SNPs with an IMPUTE2 information score greater than  
208 0.8 were included in this analysis. Number of individuals and SNPs varied across ancestry-trait combinations  
209 and are given in [Table S5](#) - [Table S10](#)

210 Individuals from the 1000 Genomes Project phase 3<sup>70</sup> and the Human Genome Diversity Panel (HGDP)<sup>71</sup>  
211 were used to obtain LD estimates between SNPs for each ancestry cohort. To construct the LD reference  
212 panel for PAGE summary statistics from the African-American ancestry cohort, unrelated individuals from  
213 the 1000 Genomes Americans of African Ancestry in SW USA (ASW) and African Caribbeans in Barbados

214 (ACB) were used. Only SNPs found in both the 1000 Genomes imputed data and PAGE summary statistics  
215 files were used in gene-level association and heritability analyses. We used the same approach to compute  
216 reference LD estimates between SNPs for the Hispanic and Latin American, AIAN, and Asian ancestry  
217 cohorts, with the following 1000 Genomes reference population, respectively: Mexican Ancestry from Los  
218 Angeles USA (MXL) and Puerto Ricans from Puerto Rico (PUR); Colombians from Medellin, Colombia  
219 (CLM) and Peruvians from Lima, Peru (PEL); and the East Asian superpopulation (EAS). For the Native  
220 Hawaiian individuals from the PAGE study, there were no appropriate reference populations in the 1000  
221 Genomes data. In order to construct a reference LD matrix for the Native Hawaiian ancestry cohort, we  
222 randomly sampled individuals from populations in the most recent release of the HGDP proportional to the  
223 global ancestry of the Native Hawaiian cohort. The Native Hawaiian cohort's global ancestry proportions  
224 were determined using ADMIXTURE runs to be 47.89% Oceanian, 25.16% East Asian, 25.51% European,  
225 0.90% African, and 0.54% AIAN in a separate publication (Wojcik preprint - in prep.). We did not sample  
226 from populations with less than 1% of the total ancestry in the admixture analysis referenced above. The  
227 resulting sample from which LD was estimated included 39 individuals from the Papuan Sepik in New  
228 Guinea and Melanesian in Bougainville, 14 individuals from the French in France, and 14 individuals from  
229 the Yoruba in Nigeria.

### 230 **WHI study cohort description**

231 The Women's Health Initiative (WHI) is a long-term, prospective, multi-center cohort study investigating  
232 post-menopausal women's health in the US. WHI was funded by the National Institutes of Health and the  
233 National Heart, Lung, and Blood Institute to study strategies to prevent heart disease, breast 124 cancer,  
234 colon cancer, and osteoporotic fractures in women 50-79 years of age. WHI involves 161,808 women recruited  
235 between 1993 and 1998 at 40 centers across the US. The study consists of two parts: the WHI Clinical Trial  
236 which was a randomized clinical trial of hormone therapy, dietary modification, and calcium/Vitamin D  
237 supplementation, and the WHI Observational Study, which focused on many of the inequities in women's  
238 health research and provided practical information about incidence, risk factors, and interventions related  
239 to heart disease, cancer, and osteoporotic fractures. For this project, women who self identified as European  
240 were excluded from the study sample (dbGaP study accession number: phs000227).

### 241 **HCHC/SOL study cohort description**

242 The Hispanic Community Health Study / Study of Latinos (HCHS/SOL) is a multi center study of His-  
243 panic/Latino populations with the goal of determining the role of acculturation in the prevalence and devel-  
244 opment of diseases, and to identify other traits that impact Hispanic/Latino health. The study is sponsored



245 by the National Heart, Lung, and Blood Institute (NHLBI) and other institutes, centers, and offices of the  
246 National Institutes of Health (NIH). Recruitment began in 2006 with a target population of 16,000 persons  
247 of Cuban, Puerto Rican, Dominican, Mexican or Central/South American origin. Household sampling was  
248 employed as part of the study design. Participants were recruited through four sites affiliated with San Diego  
249 State University, Northwestern University in Chicago, Albert Einstein College of Medicine in Bronx, New  
250 York, and the University of Miami. Researchers from seven academic centers provided scientific and logistical  
251 support. Study participants who were self-identified Hispanic/Latino and aged 18-74 years underwent ex-  
252 tensive psycho-social and clinical assessments during 2008-2011. A re-examination of the HCHS/SOL cohort  
253 is conducted during 2015-2017. Annual telephone follow-up interviews are ongoing since study inception to  
254 determine health outcomes of interest. (dbGaP study accession number: phs000555).

### 255 **BioMe Biobank study cohort description**

256 The Charles Bronfman Institute for Personalized Medicine at Mount Sinai Medical Center (MSMC), BioMe™  
257 54 BioBank (BioMe) is an EMR-linked bio-repository drawing from Mount Sinai Medical Center consented  
258 patients which were drawn from a population of over 70,000 inpatients and 800,000 outpatients annually.  
259 The MSMC serves diverse local communities of upper Manhattan, including Central Harlem (86% African  
260 American), East Harlem (88% Hispanic/Latino), and Upper East Side (88% Caucasian/White) with broad  
261 health disparities. BioMe™ 58 enrolled over 26,500 participants from September 2007 through August  
262 2013, with 25% African American, 36% Hispanic/Latino (primarily of Caribbean origin), 30% Caucasian,  
263 and 9% of Other ancestry. The BioMe™ 60 population reflects community-level disease burdens and health  
264 disparities with broad public health impact. Biobank operations are fully integrated in clinical care pro-  
265 cesses, including direct recruitment from clinical sites waiting areas and phlebotomy stations by dedicate  
266 Biobank recruiters independent of clinical care providers, prior to or following a clinician standard of care  
267 visit. Recruitment currently occurs at a broad spectrum of over 30 clinical care sites. Study participants  
268 of self-reported European ancestry were not included in this analysis. (dbGaP study accession number:  
269 phs000925).

### 270 **MEC study cohort description**

271 The Multiethnic Cohort (MEC) is a population-based prospective cohort study including approximately  
272 215,000 men and women from Hawaii and California. All participants were 45-75 years of age at baseline, and  
273 primarily of 5 ancestries: Japanese Americans, African Americans, European Americans, Hispanic/Latinos,  
274 and Native Hawaiians. MEC was funded by the National Cancer Institute in 1993 to examine lifestyle risk  
275 factors and genetic susceptibility to cancer. All eligible cohort members completed baseline and follow-up

276 questionnaires. Within the PAGE II investigation, MEC proposes to study: 1) diseases for which we have  
277 DNA available for large numbers of cases and controls (breast, prostate, and colorectal cancer, diabetes,  
278 and obesity); 2) common traits that are risk factors for these diseases (e.g., body mass index / weight,  
279 waist-to-hip ratio, height), and 3) relevant disease-associated biomarkers (e.g., fasting insulin and lipids,  
280 steroid hormones). The specific aims are: 1) to determine the population-based epidemiologic profile (al-  
281 lele frequency, main effect, heterogeneity by disease characteristics) of putative causal SNPs in the five  
282 racial/ethnic groups in MEC; 2) for SNPs displaying effect heterogeneity across ethnic/racial groups, we will  
283 utilize differences in LD to identify a more complete spectrum of associated SNPs at these loci; 3) investi-  
284 gate gene x gene and gene x environment interactions to identify modifiers; 4) examine the associations of  
285 putative causal SNPs with already measured intermediate phenotypes (e.g., plasma insulin, lipids, steroid  
286 hormones); and 5) for SNPs that do not fall within known genes, start to investigate their relationships with  
287 gene expression and epigenetic patterns in small genomic studies. For this project, MEC contributed African  
288 American, Japanese American, and Native Hawaiian samples.(dbGaP study accession number: phs000220).

## 289 **Fine-mapping analyses**

### 290 **Methods: Protocol for implementation of SuSiE and PESCA**

291 To perform SNP-level fine mapping analyses on a given quantitative trait, we applied Sum of Single Effects  
292 (SuSiE) variable selection software<sup>65</sup>. SuSiE implements a Bayesian linear regression model on individual  
293 level data where sparse prior distributions are placed on the effect size of SNP and posterior inclusion  
294 probabilities (PIPs) are used to summarize their statistical relevance to the trait of interest. The software  
295 for SuSiE requires an input  $\ell$  which fixes the maximum number of causal SNPs to include in the model. In  
296 this work, we consider results when this parameter is chosen conservatively ( $\ell = 3000$ ). We used the three  
297 cohorts for which we had genotype data from the UK Biobank (African, European, and South Asian) to  
298 test whether there was effect size heterogeneity among ancestries in the 25 traits analyzed in this study. We  
299 first selected ten independent, non-overlapping subsamples of 10,000 individuals from the European ancestry  
300 cohort and filtered out any SNPs that had a minor allele frequency of less than 0.01. For each subsample, we  
301 then applied SuSiE to each of the 25 traits and compared the effect sizes and posterior inclusion probabilities.  
302 The average number of SNPs with an effect size greater than 0.01 and average number of SNPs with a PIP  
303 greater than 0.01 for each trait across the ten cohorts are reported in [Table S19](#) [Table S19](#) also reports the  
304 median correlation coefficient of effect sizes and PIPs among the 45 pairwise comparisons between the 10  
305 subsample cohorts.

306 We then applied SuSiE to the African and South Asian ancestry cohorts and compared their resulting

307 effect sizes and PIPs to ten independent, non-overlapping subsamples of the European ancestry cohort. The  
308 number of SNPs with an effect size greater than 0.1 and PIPs greater than 0.01 in both the focal cohort  
309 (either African or South Asian) and at least one of the ten European ancestry subsamples of the same size  
310 are reported in [Table S20](#) and [Table S21](#). Also reported in these tables, are the mean number of effect sizes  
311 greater than 0.01 and PIPs greater than 0.01 across the European ancestry subsamples for each trait and the  
312 number of unique effect sizes greater than 0.01 and PIPs greater than 0.01 that were only identified in the  
313 African or South Asian ancestry cohorts. Finally, [Table S20](#) and [Table S21](#) report the median correlation  
314 coefficient of the African or South Asian ancestry cohort effect sizes and PIPs with the ten European ancestry  
315 subsample cohorts of the same size.

316 We report the median Cochran’s Q statistic calculated among all pairs of European subsamples for  
317 posterior inclusion probabilities (PIPs) [Table S22](#). Additionally, we report the median Cochran’s Q for  
318 both PIPs and effect sizes between the ten European ancestry subsamples and the South Asian and African  
319 ancestry cohorts from the UK Biobank.

320 We compared the results of two fine-mapping methods, SuSie<sup>65</sup> and PESCA<sup>72</sup>, when applied to SNP-level  
321 summary statistics in the European (UKB) and East Asian (BBJ) cohorts. SuSie is an iterative Bayesian  
322 stepwise selection method that identifies a credible set of SNPs that contribute to a phenotype of interest<sup>65</sup>.  
323 Using the effect sizes and standard errors generated from the standard GWA framework for each trait in each  
324 ancestry, we applied SuSiE in order to identify probable sets of causal SNPs. We then found the correlation  
325 between the posterior inclusion probabilities of each SNP in the European and East Asian cohorts.

326 Unlike SuSiE, the PESCA framework is explicitly designed for identifying shared SNP-level association  
327 signals between multiple ancestry cohorts versus ancestry-specific associations<sup>72</sup>. In addition to GWA sum-  
328 mary statistics, PESCA uses information about the correlation structure between SNPs (i.e., LD) to identify  
329 SNPs that are likely to be causal in two cohorts of interest. Shi et al.<sup>72</sup> analyzed seven continuous traits in  
330 the European (UKB) and East Asian (BBJ) cohorts using PESCA and produced posterior probabilities that  
331 individual SNPs were: (i) associated with a phenotype in both the both cohorts, (ii) associated with the  
332 trait of interest only in the European cohort, or (iii) associated with the trait of interest only in the East  
333 Asian cohort. For each trait, we calculated the number of SNPs that were nominally significant ( $p$ -value  
334  $< 10^{-5}$ , as in the original PESCA analysis) in the standard GWA framework in both the European and  
335 East Asian cohorts and had a PESCA posterior probability of being associated in both ancestries  $> 0.8$  (see  
336 [Table S18](#)). We also found the number of SNPs that had a PESCA posterior probability of being associated  
337 in both ancestries  $> 0.8$  that were only identified as significant in one ancestry using the GWA framework.

338 Finally, we explored the recent proposition of Mathieson<sup>73</sup> that the direction of effect for SNP-level  
339 summary statistics might be conserved among ancestry cohorts even if those variants are not genome-wide

340 significant in either cohort. To that end, for each of the 25 traits that we analyzed, we compared the direction  
341 of SNP effect sizes between the European and East Asian ancestry cohorts. We were only able to carry this  
342 analysis out for variants that were genotyped in both cohorts (Table S18). For each remaining nominally  
343 significant variant, we stored the direction of the effect size and checked the direction of effect size in the  
344 other ancestry. When zero was included within the range of the effect size plus or minus one standard  
345 deviation, we assumed the SNP did not have the same direction in both cohorts. We note that this test  
346 may be confounded by the precision of effect size estimation and warrants further exploration, including an  
347 analysis of local false sign discovery rates (see 7475).

### 348 **Results: Fine-mapping methods have variable efficacy in identification of SNP level associa-** 349 **tions among ancestry cohorts**

350 Often, replication of GWA results across cohorts is tested using genomic regions centered on a SNP. Scans  
351 across the region surrounding the SNP of interest are usually defined arbitrarily — using physical windows  
352 (or “clumps”) to smooth over ascertainment bias and varying LD across cohorts or ancestries instead of  
353 using regions that are biologically annotated such as genes or transcriptional elements. While clumping  
354 presents an easy way to scan for regional replication of a given GWA finding, the corresponding results are  
355 not readily interpretable when prioritizing GWA results for downstream validation. We performed clumping  
356 using windows of size 1Mb centered around significant SNP-level associations (see Materials and Methods).  
357 Height had the largest proportion of windows that contain a SNP-level association that replicated in at least  
358 two ancestries (Figure S5B and Figure S5E). In the three traits with the greatest proportion of windows  
359 containing SNP-level replications — height (77.09% of clumps), urate (65.89%), and low density lipoprotein  
360 (54.40%) — we then recorded the number of genes and transcriptional elements within the window that  
361 contained GWA significant SNP-level associations. We found that for all three traits, the vast majority of  
362 1Mb windows that were used to clump SNP-level associations contained multiple genes and transcriptional  
363 elements with significantly associated SNPs: height (94.04% of significant variants are within 1 Mb of two  
364 or more genes, 17.93 genes in clump (mean)  $\pm$  15.71 (standard deviation)), urate (97.47%,  $18.44 \pm 13.72$ ),  
365 and low density lipoprotein (99.12%,  $14.85 \pm 12.89$ ). Thus, we find window-based clumping does not easily  
366 produce biologically interpretable hypotheses for downstream validation.

367 Recent analyses of multi-ancestry GWA cohorts have also tested for effect size heterogeneity 64 65 69 76 77.  
368 We applied the fine-mapping method SuSiE 65 to identify signals of effect size heterogeneity in the three  
369 ancestry cohorts for which we had access to raw genotype data (UK Biobank European ancestry, African  
370 ancestry, and South Asian ancestry individuals; see Table S1). We find little evidence of correlated SuSiE  
371 effect size estimates among ancestry cohorts, including among independent subsamples of the UK Biobank

372 European ancestry individuals [Table S19](#) - [Table S21](#). In addition, we applied PESCA (a method developed  
373 by Shi et al. [64](#)) to the results of our SNP-level analysis to understand how the modeling of LD affected the  
374 power to identify probably causal SNPs shared in the European and East Asian ancestry cohorts. PESCA  
375 improves upon standard clumping approaches by modeling the LD in a region to identify SNPs that are  
376 likely to be causal for the same trait in multiple ancestries. In a comparison with the results from seven  
377 continuous traits analyzed in the original study [64](#), we found that the vast majority of SNPs identified by  
378 PESCA as causal (posterior probability  $> 0.8$ ) in both ancestries were also nominally significant in our SNP-  
379 level association results (see [Table S18](#)). Both SuSiE [65](#) and PESCA [64](#) demonstrate the utility of modeling  
380 variation in LD structure among ancestries when conducting multi-ancestry GWA studies.

381 Recently, Mathieson [73](#) proposed the hypothesis that the direction of effect sizes is the same among  
382 ancestries, even when the effects are not genome-wide significant. To test this, we compared the direction  
383 of effect in SNPs that were significant in either the European or East Asian ancestry cohort to the direction  
384 of the effect in the other ancestry where the SNP was tested using the standard GWA framework. We limit  
385 the comparison to the European and East Asian cohorts due to their large sample sizes which increases the  
386 precision of effect size estimates. [Table S18](#) shows the number of variants that were significantly associated  
387 with each trait in at least one of the European and East Asian ancestry cohorts, and also displays the number  
388 of those variants that have the same direction of effect as the significant variant in the other ancestry. In the 25  
389 traits that we analyzed, the direction of effect was conserved in both the European and East Asian ancestry  
390 cohorts (between effect direction concordance from 55.87% and 76.56% of SNPs across 25 traits). The  
391 remaining SNPs where the direction of the effect size was not conserved represent those SNPs that: (i) had  
392 different direction of effect size, (ii) were not tested in both ancestry cohorts, or (iii) had effect size estimates  
393 within one standard error of zero ([Table S18](#)). The observed conservation of effect size direction in multiple  
394 ancestry cohorts, even when SNPs are non-significant in one or more cohorts, is a primary assumption  
395 of regional enrichment methods and supports Mathieson [73](#)'s hypothesis and findings. This suggests that  
396 regional enrichment methods, which are sensitive to shared patterns of effect size direction among cohorts,  
397 are a natural approach to apply to GWA summary statistics even in the absence of replication SNP-level  
398 GWA signals among cohorts. We ultimately acknowledge that a more in depth analysis of fine-mapping  
399 application to multi-ancestry genetic data is needed to make any conclusions. This precursory analysis using  
400 the SuSiE [54](#) and PESCA [64](#) highlights that there is widespread heterogeneity in direction of effect.

## 401 **S0.2 Description of the gene- $\varepsilon$ framework**

402 A unique feature of gene- $\varepsilon$  is that it treats SNPs with spuriously associated nonzero effects as non-associated.  
403 gene- $\varepsilon$  assumes a reformulated null distribution of SNP-level effects  $\tilde{\beta}_j \sim \mathcal{N}(0, \sigma_\varepsilon^2)$ , where  $\sigma_\varepsilon^2$  is the SNP-

404 level null threshold and represents the maximum proportion of phenotypic variance explained (PVE) by a  
405 spurious or non-associated SNP. This leads to the reformulated SNP-level null hypothesis  $H_0: \mathbb{E}[\beta_j^2] \leq \sigma_\varepsilon^2$ .  
406 To infer an appropriate  $\sigma_\varepsilon^2$ , gene- $\varepsilon$  fits a  $K$ -mixture of normal distributions over the regularized effect sizes  
407 with successively smaller variances (i.e.,  $\sigma_1^2 > \dots > \sigma_K^2 = 0$ ). In this study as in Cheng et al.<sup>[53]</sup>, we  
408 assume that associated SNPs will appear in the first set, while spurious and non-associated SNPs appear  
409 in the latter sets. As a final step, gene- $\varepsilon$  computes its gene-level association test statistic for the  $g$ -th gene  
410 by conformably partitioning the regularized GWA effect size estimates and computing the quadratic form  
411  $\tilde{Q}_g = \tilde{\beta}_g^\top \tilde{\beta}_g$ . Corresponding  $p$ -values are then derived using Imhof’s method. This assumes the common gene-  
412 level null  $H_0: Q_g = 0$ , where the null distribution of  $Q_g$  is dependent upon the eigenvalues from the scaled  
413 LD matrix  $\sigma_\varepsilon^2 \mathbf{\Sigma}$ . For details on implementation, validation and performance comparison with simulations,  
414 and empirical application to UK Biobank white British individuals in six traits, see Cheng et al.<sup>[53]</sup>.

### 415 **S0.3 Regression with Summary Statistics (RSS) Enrichment.**

Consider a GWA study with  $N$  individuals typed on  $P$  SNPs. For the  $j$ -th SNP, assume that we are given  
corresponding effect sizes  $\hat{\beta}_j$  and standard error  $\hat{s}_j$  via a single-SNP linear model fit using OLS. RSS then  
implements the following likelihood to model the GWA summary statistics<sup>[54]</sup>

$$\hat{\beta} \sim \mathcal{N}(\hat{\mathbf{S}}\mathbf{\Sigma}\hat{\mathbf{S}}^{-1}\boldsymbol{\beta}, \hat{\mathbf{S}}\mathbf{\Sigma}\hat{\mathbf{S}}) \quad (1)$$

where  $\hat{\mathbf{S}} = \text{diag}(\hat{\mathbf{s}})$  is a  $J \times J$  diagonal matrix of standard errors,  $\mathbf{\Sigma}$  is again used to represent some empirical  
estimate of the LD matrix (i.e., using some external reference panel with ancestry matching the cohort of  
interest), and  $\boldsymbol{\beta}$  are the true (unobserved) SNP-level effect sizes. To model gene-level enrichment, RSS  
assumes the following hierarchical prior structure on the true effect sizes

$$\beta_j \sim \pi_j \mathcal{N}(0, \sigma_\beta^2) + (1 - \pi_j) \delta_0, \quad (2)$$

$$\sigma_\beta^2 = h^2 \left( \sum_{j=1}^J \pi_j N^{-1} \hat{s}_j^{-2} \right)^{-1}, \quad (3)$$

$$\pi_j = \left( 1 + 10^{-(\theta_0 + a_j \theta)} \right)^{-1}, \quad (4)$$

where  $\delta_0$  is point mass centered at zero,  $h^2$  denotes the narrow-sense heritability of the trait,  $a_j$  is an indicator  
detailing whether the  $j$ -th SNP is inside a particular gene,  $\theta_0$  is the background proportion of trait-associated  
SNPs, and  $\theta$  reflects the increase in probability (on the  $\log_{10}$ -odds scale) when a SNP within a gene has  
non-zero effect. Here, the authors follow earlier works<sup>[78]</sup> and place independent uniform grid priors on the

hyper-parameters  $\{h^2, \theta_0, \theta\}$ . Note that, unlike other methods, RSS does not calculate a  $P$ -value for assessing gene-level association. Instead, RSS produces a posterior enrichment probability that at least one SNP in a given gene boundary is associated with the trait

$$P_g := 1 - \Pr[\beta_j = 0, \forall j \in \mathcal{J}_g | \mathbf{D}] \quad (5)$$

416 where  $\mathbf{D}$  represents all of the input data including the GWA summary statistics  $\{\widehat{\boldsymbol{\beta}}, \widehat{\mathbf{s}}\}$ , the estimated LD  
 417 matrix  $\boldsymbol{\Sigma}$ , and any applicable SNP annotations or weights  $\mathbf{a} = (a_1, \dots, a_J)$ . See [5479](#) for more details on  
 418 preferred hyper-parameter settings. As noted in the main text, RSS relies on a Markov chain Monte Carlo  
 419 (MCMC) scheme for sampling posterior distributions and estimating model parameters. As a result, its  
 420 algorithm can be subject to convergence issues if these (or the random seed) are not chosen properly.

#### 421 **S0.4 SNP-set (Sequence) Kernel Association Test (SKAT).**

The implementation of SKAT required access to raw phenotype  $\mathbf{y}$  and genotype  $\mathbf{X}$  information for  $N$  individuals typed on  $J$  SNPs. To assess enrichment of the  $|\mathcal{J}_g|$  variants within gene  $g$ , consider the linear model with sub-matrix  $\mathbf{X}_g$

$$\mathbf{y} = \beta_0 + \mathbf{X}_g \boldsymbol{\beta}_g + \mathbf{e}, \quad \mathbf{e} \sim \mathcal{N}(\mathbf{0}, \tau^2 \mathbf{I}) \quad (6)$$

where  $\beta_0$  is an intercept term,  $\boldsymbol{\beta}_g = (\beta_1, \dots, \beta_{|\mathcal{J}_g|})$  is a vector of regression coefficients for the SNPs within the gene of interest, and  $\mathbf{e}$  is a normally distributed error term with mean zero and scaled variance  $\tau^2$ . For model flexibility, gene-specific SNP effects  $\beta_j$  are assumed to follow an arbitrary distribution with mean zero and marginal variances  $a_j \sigma_\beta^2$ , where  $\sigma_\beta^2$  is a variance component and  $a_j$  is a pre-specified weight for the  $j$ -th SNP. To this end, SKAT uses a variance component scoring approach and tests the null hypothesis  $H_0: \boldsymbol{\beta} = \mathbf{0}$ , or equivalently  $H_0: \sigma_\beta^2 = 0$ . The corresponding gene-level test statistic  $\widehat{Q}_g$  then takes on the familiar quadratic form

$$\widehat{Q}_g = (\mathbf{y} - \widehat{\boldsymbol{\beta}}_0)^\top \mathbf{K}_g (\mathbf{y} - \widehat{\boldsymbol{\beta}}_0) \quad (7)$$

where  $\widehat{\boldsymbol{\beta}}_0$  is the predicted mean of trait under the null hypothesis, and is computed by projecting  $\mathbf{y}$  onto the column space of the intercept (i.e., a vector of ones). The term  $\mathbf{K}_g = \mathbf{X}_g \mathbf{A}_g \mathbf{A}_g \mathbf{X}_g^\top$  is commonly referred to as an  $N \times N$  kernel matrix, where  $\mathbf{A}_g = \text{diag}(a_1, \dots, a_{|\mathcal{J}_g|})$  is used to denote a diagonal weight matrix that

changes for each gene  $g$ . Each element of  $\mathbf{K}_g$  is computed via the linear kernel function

$$k(\mathbf{x}_i, \mathbf{x}_{i'}) = \sum_{j=1}^{|\mathcal{J}_g|} a_j x_{ij} x_{i'j}. \quad (8)$$

422 While implementing SKAT in this work, we follow previous works and set each weight to be  $\sqrt{a_j} =$   
423  $\text{Beta}(\text{MAF}_j, 1, 25)$  — the beta distribution density function with pre-specified parameters evaluated at the  
424 sample minor allele frequency (MAF) for the  $j$ -th SNP in the gene region. For more details, see [55](#)[80](#)[82](#).

### 425 **Clustering traits sharing a core set of associated genes using the WINGS algorithm**

426 We used the WINGS algorithm<sup>[83](#)</sup> to identify clusters of traits sharing a core set of genes enriched for  
427 associated mutations. WINGS takes as input a gene ( $M$ ) by trait ( $N$ ) matrix and uses the Ward distance  
428 metric to find the distance among vectors of gene scores for different phenotypes; in this study, we used  
429 gene- $\varepsilon$  gene-level association statistics as the input to WINGS. The more significantly associated genes that  
430 two traits share, the closer they will be in the gene-dimensional space. Applying WINGS to a matrix of  
431 gene scores for each ancestry separately, we examined whether the same traits clustered together, separately  
432 in each ancestry. We constructed matrices of gene- $\varepsilon$  gene-level association statistics for the UK Biobank  
433 European, African, South Asian (from the UK Biobank) and East Asian (Biobank Japan) ancestry cohorts.  
434 Each of these matrices contained gene-level association statistics for all 25 quantitative traits of interest.  
435 The total number of genes and regulatory regions included were: European (23,603), African (23,575),  
436 South Asian(23,671), and East Asian (21,435). For the East Asian ancestry cohort, we limited the genes  
437 to the intersection of genes with gene- $\varepsilon$  gene-level association statistics across all 25 traits. The number of  
438 gene scores calculated for each trait in the East Asian ancestry cohort varies due to the heterogeneity in  
439 imputed and genotype SNP arrays in the Biobank Japan studies ([Table S5](#) and [Table S16](#)). [Figure S21](#) shows  
440 the resulting dendrograms displaying prioritized phenotypes identified using the WINGS algorithm on each  
441 cohort’s gene score matrix. The WINGS algorithm is designed to run on 25 phenotypes or more (see McGuirl  
442 et al.<sup>[83](#)</sup> for details), and we therefore did not apply the WINGS algorithm to the AIAN, Native Hawaiian,  
443 or Hispanic and Latin American cohorts as there was not data for enough phenotypes ([Table S6](#) [Table S10](#)).

### 444 **Analysis of GWAS Catalog Metadata and Previous GWA Publications**

445 We cross-referenced our results from association testing at multiple genomic scales against previously pub-  
446 lished results in the GWAS catalog (<https://www.ebi.ac.uk/gwas/>) and in PubMed using the following  
447 processes.

448 In order to collect PubMed IDs (PMIDs) for publications associated with the UK Biobank, a two-part



449 data collection process was used. The first process was to directly search for publications with variations  
450 of the term “UK Biobank” (e.g., U.K. Biobank, United Kingdom Biobank) from PubMed using the Entrez  
451 Programming Utilities (E-Utilities) API. The E-Utilities API is the public API to the NCBI Entrez sys-  
452 tem and allows direct access to all Entrez databases including PubMed. Search queries were formulated by  
453 narrowing publications using year published and then further narrowing to those publications with varia-  
454 tions of the search term “UK Biobank” in either the title or abstract. The open-source Python package  
455 Entrez (<https://biopython.org/DIST/docs/api/Bio.Entrez-module.html>) from the Biopython Project  
456 was used to facilitate interaction with the E-Utilities API.

457 The second data collection process was to gather information from publications listed directly on the UK  
458 Biobank website (<https://www.ukbiobank.ac.uk/>). Since the majority of publications on the website did  
459 not have an easily accessible PMID, identifying information including publication title and year was scraped  
460 and used to retrieve a publication’s corresponding PMID (again using the E-Utilities API). The HTML/XML  
461 document parsing Python library BeautifulSoup ([https://www.crummy.com/software/BeautifulSoup/  
462 bs4/doc/](https://www.crummy.com/software/BeautifulSoup/bs4/doc/)) was used to parse the HTML of the various UK Biobank webpages, and the Python Requests  
463 library (<https://requests.readthedocs.io/en/master/>) was used to programatically send HTTP calls  
464 to the server hosting the website. PMIDs were retrieved directly from the XML output of the E-Utilities  
465 API calls.

466 The PMIDs retrieved from both processes were aggregated into a single set of unique PMIDs, as some  
467 publications were identified by both processes. Publications that could not get associated PMIDs from the  
468 second data collection process were flagged for manual processing. The PMIDs that were retrieved from  
469 PubMed directly but could not be found based on the publication information provided on the UK Biobank  
470 website were noted. Conversely, the PMIDs that could be retrieved from publication information found on  
471 the UK Biobank website but not directly from PubMed were also noted.

472 Using the compiled list of PMIDs, analyses of the UK Biobank data set reported in the GWAS cat-  
473 alog association data were compiled. Previous genotype-to-phenotype association data and sample an-  
474 cestry descriptions were downloaded from <https://www.ebi.ac.uk/gwas/docs/file-downloads>. Unique  
475 genotype-to-phenotype associations were parsed using a set of custom python scripts. All scripts used  
476 in the curation of PMIDs, parsing of GWAS catalog summary data, and determination of previously  
477 published genotype-to-phenotype associations from UK Biobank studies are available on GitHub ([https:  
478 //github.com/ramachandran-lab/redefining\\_replication](https://github.com/ramachandran-lab/redefining_replication)).

479 **Simulation design to test the power and false discovery rate of GWA and gene-level association**  
480 **analyses**

481 **Simulations of a single population**

482 In our simulation studies, we used the following general simulation scheme to generate quantitative traits  
483 using real genotype data on chromosome 1 from  $N$  randomly sampled individuals of European ancestry in  
484 the UK Biobank. This pipeline follows from previous studies<sup>53,84</sup>. We will use  $\mathbf{X}$  to denote the  $N \times J$   
485 genotype matrix, with  $J$  denoting the number of single nucleotide polymorphisms (SNPs) encoded as 0, 1, 2  
486 copies of a reference allele at each locus and  $\mathbf{x}_j$  representing the genotypic vector for the  $j$ -th SNP. Following  
487 quality control procedures detailed in the Supplemental Information, our simulations included  $J = 36,518$   
488 SNPs distributed across genome. We used the NCBI's RefSeq database in the UCSC Genome Browser to  
489 assign SNPs to genes which resulted in  $G = 1,408$  genes in the simulation studies.

490 After the annotation step, we simulated phenotypes by first assuming that the total phenotypic variance  
491  $\mathbb{V}[\mathbf{y}] = 1$ , and that all observed genetic effects explained a fixed proportion of this value (i.e., narrow-sense  
492 heritability,  $h^2$ ). Next, we randomly selected a certain percentage of genes to be enriched for associations  
493 and denoted the sets of SNPs that they contained as  $\mathcal{C}$ . Within  $\mathcal{C}$ , we selected causal SNPs in a way such  
494 that each associated gene at least contains one SNP with non-zero effect size. Quantitative continuous traits  
495 were then generated under the following two general linear models:

496 • Standard Model:  $\mathbf{y} = \sum_{c \in \mathcal{C}} \mathbf{x}_c \beta_c + \mathbf{e}$

497 • Population Structure Model:  $\mathbf{y} = \mathbf{W}\mathbf{b} + \sum_{c \in \mathcal{C}} \mathbf{x}_c \beta_c + \mathbf{e}$

498 where  $\mathbf{y}$  is an  $N$ -dimensional vector containing all the phenotype states;  $\mathbf{x}_c$  is the genotype for the  $c$ -th  
499 causal SNP;  $\beta_c$  is the additive effect size for the  $c$ -th SNP; and  $\mathbf{e} \sim \mathcal{N}(0, \tau^2 \mathbf{I})$  is an  $N$ -dimensional vector  
500 of normally distributed environmental noise. Additionally, in the model with population structure,  $\mathbf{W}$  is an  
501  $N \times M$  matrix of the top  $M = 10$  principal components (PCs) from the genotype matrix and represents  
502 additional population structure with corresponding fixed effects  $\mathbf{b}$ . The effect sizes of SNPs in genes enriched  
503 for associations are randomly drawn from standard normal distributions and then rescaled so they explain  
504 a fixed proportion of the narrow-sense heritability  $\mathbb{V}[\sum \mathbf{x}_c \beta_c] = h^2$ . The coefficients for the genotype PCs  
505 are also drawn from standard normal distributions and rescaled such that  $\mathbb{V}[\mathbf{W}\mathbf{b}] = 10\%$  of the total  
506 phenotypic variance, with the variance of all non-genetic effects contributing  $\mathbb{V}[\mathbf{W}\mathbf{b}] + \mathbb{V}[\mathbf{e}] = (1 - h^2)$ . For  
507 any simulations conducted under the population structure model, genotype PCs are not included in any of  
508 the model fitting procedures, and no other preprocessing normalizations were carried out to account for the  
509 additional population structure. More specifically, GWA summary statistics are then computed by fitting a

single-SNP univariate linear model via ordinary least squares (OLS):

$$\hat{\beta}_j = (\mathbf{x}_j^T \mathbf{x}_j)^{-1} \mathbf{x}_j^T \mathbf{y}; \quad (9)$$

for every SNP in the data  $j = 1, \dots, J$ . These OLS effect size estimates, along with an empirically LD matrix  $\Sigma$  computed directly from the full  $N \times J$  genotype matrix  $\mathbf{X}$ , are given to gene- $\varepsilon$ . We also retain standard errors and  $p$ -values for the implementation of competing methods: RSS<sup>54</sup>, SKAT<sup>55</sup>, and the standard GWA SNP-level association test. Given the simulation procedure above, we simulate a wide range of scenarios for comparing the performance of gene-level association approaches by varying the following parameters:

- Number of individuals:  $N = 5,000$  and  $10,000$ ;
- Narrow-sense heritability:  $h^2 = 0.2$  and  $0.6$ ;
- Percentage of enriched genes: 1% (sparse) and 10% (polygenic);

Furthermore, we set the number of causal SNPs with non-zero effects to be some fixed percentage of all SNPs located within the designated genes enriched for associations. We set this percentage to be 0.125% in the 1% associated SNP-set case, and 3% in the 10% associated SNP-set case. All performance comparisons are based on 100 different simulated runs for each parameter combination. Lastly, for each simulated dataset, we also selected some number of intergenic SNPs (i.e., SNPs not mapped to any gene) to have non-zero effect sizes. This was done to mimic genetic associations in unannotated regulatory elements. Specifically, five randomly selected intergenic SNPs were given non-zero contributions to the trait heritability in the 1% enriched genes case, and 30 intergenic SNPs were selected in the 10% enriched genes case.

All performance comparisons are based on 100 different simulated runs for each parameter combination. We computed gene-level  $p$ -values for gene- $\varepsilon$ , SKAT, and the single-SNP GWAS. For evaluating the performance of RSS, we compute posterior enrichment probabilities. For all approaches, we assessed the power and false discovery rates when identifying enriched genes at either a Bonferroni-corrected threshold ( $p = 0.05/1,408$  genes =  $3.55 \times 10^{-5}$ ) or according to the median probability model (posterior enrichment probability  $> 0.5$ )<sup>85</sup>. [Figure S6](#) and [Figure S7](#) show the mean performances (and standard errors) across all simulated replicates. [Figure S8](#) illustrates that both GWAS and gene- $\varepsilon$  are limited by the sample size of the cohort of interest. Specifically, when the sample size is set to 2,000 individuals power is low and false discovery rates are high for both the standard GWA framework and gene- $\varepsilon$ .

## 536 Simulations of genetic trait architecture in two populations

537 We used the African (UKB) cohort and a subset of the European cohort and simulation studies to test the  
538 ability of GWAS and gene- $\epsilon$  to detect shared causal SNPs (in the case of gene- $\epsilon$ , genes containing causal  
539 SNPs) in a multi-ancestry study. Using the same simulation protocol as that described for testing power of  
540 different enrichment analysis methods, described in *Simulations in a single population*, we labeled all genes  
541 containing at least one causal SNP as "causal". We first determined the power of gene- $\epsilon$  to identify SNPs or  
542 genes that are causal in each cohort under a variety of genomic architectures. The total amount of variance  
543 explained in the phenotype by the causal SNPs (i.e. the narrow-sense heritability) to be equal to 0.2 or  
544 0.6. In each of these contexts, the sparsity of causal variants as a function of the total number of variants  
545 was set to either 0.1 or 0.5. These values of causal SNP sparsity were selected in order to ensure that an  
546 ample number of SNPs were associated with the phenotype in both cohorts. Finally, the overlap in causal  
547 SNPs between the two cohorts was tested at proportions equal to 0 (no overlap in causal between SNPs  
548 cohorts) 0.25, 0.5, and 1 (complete overlap in causal SNPs between cohorts). For each of these parameter  
549 sets, 50 replicate simulations were performed of two cohorts derived from 10,000 European individuals and  
550 4,967 African individuals, respectively. We summarize the performance of the standard GWA framework  
551 and gene- $\epsilon$  across the parameter space. Generally, gene- $\epsilon$  performs better on the European cohort than it  
552 does in the African cohort, but is better powered in the African cohort when the causal SNPs are the same  
553 in both cohorts (Figure S9 and Figure S10). Additionally, gene- $\epsilon$  performs better when identifying causal  
554 genes that are shared between the two cohorts - particularly when traits have high heritability (Figure S11 -  
555 Figure S12).

## 556 References

- 557 [1] Terhi Kettunen, Carita Eklund, Mika Kähönen, Antti Jula, Hannu Päivä, Leo-Pekka Lyytikäinen, Mikko  
558 Hurme, and Terho Lehtimäki. Polymorphism in the c-reactive protein (crp) gene affects crp levels in  
559 plasma and one early marker of atherosclerosis in men: The health 2000 survey. Scandinavian journal  
560 of clinical and laboratory investigation, 71(5):353–361, 2011.
- 561 [2] Amy Z Fan, Ajay Yesupriya, Man-huei Chang, Meaghan House, Jing Fang, Renée Ned, Donald Hayes,  
562 Nicole F Dowling, and Ali H Mokdad. Gene polymorphisms in association with emerging cardiovascular  
563 risk markers in adult women. BMC medical genetics, 11(1):6, 2010.
- 564 [3] E Komurcu-Bayrak, N Erginel-Unaltuna, A Onat, B Ozsait, C Eklund, M Hurme, N Mononen, R Laak-

- 565 sonen, G Hergenc, and T Lehtimäki. Association of c-reactive protein (crp) gene allelic variants with  
566 serum crp levels and hypertension in turkish adults. Atherosclerosis, 206(2):474–479, 2009.
- 567 [4] AJ Szalai, J Wu, EM Lange, MA McCrory, CD Langefeld, A Williams, SO Zakharkin, Varghese George,  
568 DB Allison, GS Cooper, et al. Single-nucleotide polymorphisms in the c-reactive protein (crp) gene  
569 promoter that affect transcription factor binding, alter transcriptional activity, and associate with dif-  
570 ferences in baseline serum crp level. Journal of Molecular Medicine, 83(6):440–447, 2005.
- 571 [5] Shi-Chao Zhang, Ming-Yu Wang, Jun-Rui Feng, Yue Chang, Shang-Rong Ji, and Yi Wu. Reversible  
572 promoter methylation determines fluctuating expression of acute phase proteins. Elife, 9:e51317, 2020.
- 573 [6] S-N Chang, C-T Tsai, C-K Wu, J-K Lee, L-P Lai, S-W Huang, L-Y Huang, C-D Tseng, J-L Lin, F-T  
574 Chiang, et al. A functional variant in the promoter region regulates the c-reactive protein gene and is a  
575 potential candidate for increased risk of atrial fibrillation. Journal of internal medicine, 272(3):305–315,  
576 2012.
- 577 [7] Hyoun-Ah Kim, Hye-Young Chun, Seung-Hyun Kim, Hae-Sim Park, and Chang-Hee Suh. C-reactive  
578 protein gene polymorphisms in disease susceptibility and clinical manifestations of korean systemic lupus  
579 erythematosus. The Journal of rheumatology, 36(10):2238–2243, 2009.
- 580 [8] Abbas Dehghan, Josée Dupuis, Maja Barbalić, Joshua C Bis, Gudny Eiriksdottir, Chen Lu, Niina  
581 Pellikka, Henri Wallaschofski, Johannes Kettunen, Peter Henneman, et al. Meta-analysis of genome-wide  
582 association studies in 80 000 subjects identifies multiple loci for c-reactive protein levels. Circulation,  
583 123(7):731–738, 2011.
- 584 [9] Paul M Ridker, Guillaume Pare, Alex Parker, Robert YL Zee, Jacqueline S Danik, Julie E Buring, David  
585 Kwiatkowski, Nancy R Cook, Joseph P Miletich, and Daniel I Chasman. Loci related to metabolic-  
586 syndrome pathways including lepr, hnf1a, il6r, and gckr associate with plasma c-reactive protein: the  
587 women’s genome health study. The American Journal of Human Genetics, 82(5):1185–1192, 2008.
- 588 [10] Symen Ligthart, Ahmad Vaez, Urmo Võsa, Maria G Stathopoulou, Paul S De Vries, Bram P Prins,  
589 Peter J Van der Most, Toshiko Tanaka, Elnaz Naderi, Lynda M Rose, et al. Genome analyses of 200,000  
590 individuals identify 58 loci for chronic inflammation and highlight pathways that link inflammation and  
591 complex disorders. The American Journal of Human Genetics, 103(5):691–706, 2018.
- 592 [11] Alex P Reiner, Sandra Beleza, Nora Franceschini, Paul L Auer, Jennifer G Robinson, Charles Kooper-  
593 berg, Ulrike Peters, and Hua Tang. Genome-wide association and population genetic analysis of c-

- 594 reactive protein in african american and hispanic american women. The American Journal of Human  
595 Genetics, 91(3):502–512, 2012.
- 596 [12] Paul Elliott, John C Chambers, Weihua Zhang, Robert Clarke, Jemma C Hopewell, John F Peden,  
597 Jeanette Erdmann, Peter Braund, James C Engert, Derrick Bennett, et al. Genetic loci associated with  
598 c-reactive protein levels and risk of coronary heart disease. Jama, 302(1):37–48, 2009.
- 599 [13] Deog Kyeom Kim, Michael H Cho, Craig P Hersh, David A Lomas, Bruce E Miller, Xiangyang Kong,  
600 Per Bakke, Amund Gulsvik, Alvar Agustí, Emiel Wouters, et al. Genome-wide association analysis of  
601 blood biomarkers in chronic obstructive pulmonary disease. American journal of respiratory and critical  
602 care medicine, 186(12):1238–1247, 2012.
- 603 [14] William J Astle, Heather Elding, Tao Jiang, Dave Allen, Dace Ruklisa, Alice L Mann, Daniel Mead,  
604 Heleen Bouman, Fernando Riveros-Mckay, Myrto A Kostadima, et al. The allelic landscape of human  
605 blood cell trait variation and links to common complex disease. Cell, 167(5):1415–1429, 2016.
- 606 [15] Juraj Sokol, Kamil Biringer, Maria Skerenova, Miroslav Hasko, Lenka Bartosova, Jan Stasko, Jan  
607 Danko, and Peter Kubisz. Platelet aggregation abnormalities in patients with fetal losses: the gp6 gene  
608 polymorphism. Fertility and sterility, 98(5):1170–1174, 2012.
- 609 [16] Andrew D Johnson, Lisa R Yanek, Ming-Huei Chen, Nauder Faraday, Martin G Larson, Geoffrey Tofler,  
610 Shio J Lin, Aldi T Kraja, Michael A Province, Qiong Yang, et al. Genome-wide meta-analyses identifies  
611 seven loci associated with platelet aggregation in response to agonists. Nature genetics, 42(7):608–613,  
612 2010.
- 613 [17] Takao Shimizu. Lipid mediators in health and disease: enzymes and receptors as therapeutic targets  
614 for the regulation of immunity and inflammation. Annual review of pharmacology and toxicology, 49:  
615 123–150, 2009.
- 616 [18] Yuji Shimizu, Kazuhiko Arima, Yuko Noguchi, Shin-Ya Kawashiri, Hirotomo Yamanashi, Mami Tamai,  
617 Yasuhiro Nagata, and Takahiro Maeda. Potential mechanisms underlying the association between sin-  
618 gple nucleotide polymorphism (brap and aldh2) and hypertension among elderly japanese population.  
619 Scientific Reports, 10(1):1–9, 2020.
- 620 [19] John D Eicher, Nathalie Chami, Tim Kacprowski, Akihiro Nomura, Ming-Huei Chen, Lisa R Yanek,  
621 Salman M Tajuddin, Ursula M Schick, Andrew J Slater, Nathan Pankratz, et al. Platelet-related  
622 variants identified by exomechip meta-analysis in 157,293 individuals. The American Journal of Human  
623 Genetics, 99(1):40–55, 2016.

- 624 [20] Rehan Qayyum, Beverly M Snively, Elad Ziv, Michael A Nalls, Yongmei Liu, Weihong Tang, Lisa R  
625 Yanek, Leslie Lange, Michele K Evans, Santhi Ganesh, et al. A meta-analysis and genome-wide associa-  
626 tion study of platelet count and mean platelet volume in african americans. PLoS Genet, 8(3):e1002491,  
627 2012.
- 628 [21] Raymond Noordam, Maxime M Bos, Heming Wang, Thomas W Winkler, Amy R Bentley, Tuomas O  
629 Kilpeläinen, Paul S de Vries, Yun Ju Sung, Karen Schwander, Brian E Cade, et al. Multi-ancestry  
630 sleep-by-snp interaction analysis in 126,926 individuals reveals lipid loci stratified by sleep duration.  
631 Nature communications, 10(1):1–13, 2019.
- 632 [22] Tom G Richardson, Eleanor Sanderson, Tom M Palmer, Mika Ala-Korpela, Brian A Ference, George  
633 Davey Smith, and Michael V Holmes. Evaluating the relationship between circulating lipoprotein lipids  
634 and apolipoproteins with risk of coronary heart disease: A multivariable mendelian randomisation  
635 analysis. PLoS medicine, 17(3):e1003062, 2020.
- 636 [23] Alexander M Kulminski, Jian Huang, Yury Loika, Konstantin G Arbeev, Olivia Bagley, Arseniy Yashkin,  
637 Matt Duan, and Irina Culminkaya. Strong impact of natural-selection-free heterogeneity in genetics  
638 of age-related phenotypes. Aging (Albany NY), 10(3):492, 2018.
- 639 [24] Thomas J Hoffmann, Elizabeth Theusch, Tanushree Haldar, Dilrini K Ranatunga, Eric Jorgenson,  
640 Marisa W Medina, Mark N Kvale, Pui-Yan Kwok, Catherine Schaefer, Ronald M Krauss, et al. A large  
641 electronic-health-record-based genome-wide study of serum lipids. Nature genetics, 50(3):401–413, 2018.
- 642 [25] Aldi T Kraja, Dhananjay Vaidya, James S Pankow, Mark O Goodarzi, Themistocles L Assimes,  
643 Iftikhar J Kullo, Ulla Sovio, Rasika A Mathias, Yan V Sun, Nora Franceschini, et al. A bivariate  
644 genome-wide approach to metabolic syndrome: Stampeed consortium. Diabetes, 60(4):1329–1339, 2011.
- 645 [26] Cassandra N Spracklen, Peng Chen, Young Jin Kim, Xu Wang, Hui Cai, Shengxu Li, Jirong Long, Ying  
646 Wu, Ya Xing Wang, Fumihiko Takeuchi, et al. Association analyses of east asian individuals and trans-  
647 ancestry analyses with european individuals reveal new loci associated with cholesterol and triglyceride  
648 levels. Human molecular genetics, 26(9):1770–1784, 2017.
- 649 [27] Makoto Kurano, Kazuhisa Tsukamoto, Shigeo Kamitsuji, Naoyuki Kamatani, Masumi Hara, Toshio  
650 Ishikawa, Bong-Jo Kim, Sanghoon Moon, Young Jin Kim, and Tamio Teramoto. Genome-wide asso-  
651 ciation study of serum lipids confirms previously reported associations as well as new associations of  
652 common snps within pcsk7 gene with triglyceride. Journal of human genetics, 61(5):427–433, 2016.

- 653 [28] Paul S De Vries, Michael R Brown, Amy R Bentley, Yun J Sung, Thomas W Winkler, Ioanna Ntalla,  
654 Karen Schwander, Aldi T Kraja, Xiuqing Guo, Nora Franceschini, et al. Multiancestry genome-wide as-  
655 sociation study of lipid levels incorporating gene-alcohol interactions. American journal of epidemiology,  
656 188(6):1033–1054, 2019.
- 657 [29] Amy R Bentley, Yun J Sung, Michael R Brown, Thomas W Winkler, Aldi T Kraja, Ioanna Ntalla,  
658 Karen Schwander, Daniel I Chasman, Elise Lim, Xuan Deng, et al. Multi-ancestry genome-wide gene-  
659 smoking interaction study of 387,272 individuals identifies new loci associated with serum lipids. Nature  
660 genetics, 51(4):636–648, 2019.
- 661 [30] Ida Surakka, Momoko Horikoshi, Reedik Mägi, Antti-Pekka Sarin, Anubha Mahajan, Vasiliki Lagou,  
662 Letizia Marullo, Teresa Ferreira, Benjamin Miraglio, Sanna Timonen, et al. The impact of low-frequency  
663 and rare variants on lipid levels. Nature genetics, 47(6):589–597, 2015.
- 664 [31] Tanya M Teslovich, Kiran Musunuru, Albert V Smith, Andrew C Edmondson, Ioannis M Stylianou,  
665 Masahiro Koseki, James P Pirruccello, Samuli Ripatti, Daniel I Chasman, Cristen J Willer, et al.  
666 Biological, clinical and population relevance of 95 loci for blood lipids. Nature, 466(7307):707–713,  
667 2010.
- 668 [32] Cristen J Willer, Ellen M Schmidt, Sebanti Sengupta, Gina M Peloso, Stefan Gustafsson, Stavroula  
669 Kanoni, Andrea Ganna, Jin Chen, Martin L Buchkovich, Samia Mora, et al. Discovery and refinement  
670 of loci associated with lipid levels. Nature genetics, 45(11):1274, 2013.
- 671 [33] Rita PS Middelberg, Manuel AR Ferreira, Anjali K Henders, Andrew C Heath, Pamela AF Madden,  
672 Grant W Montgomery, Nicholas G Martin, and John B Whitfield. Genetic variants in lpl, oasl and  
673 tomm40/apoe-c1-c2-c4 genes are associated with multiple cardiovascular-related traits. BMC medical  
674 genetics, 12(1):123, 2011.
- 675 [34] Sekar Kathiresan, Olle Melander, Candace Guiducci, Aarti Surti, Noël P Burt, Mark J Rieder, Gre-  
676 gory M Cooper, Charlotta Roos, Benjamin F Voight, Aki S Havulinna, et al. Six new loci associated  
677 with blood low-density lipoprotein cholesterol, high-density lipoprotein cholesterol or triglycerides in  
678 humans. Nature genetics, 40(2):189–197, 2008.
- 679 [35] Jaspal S Kooner, John C Chambers, Carlos A Aguilar-Salinas, David A Hinds, Craig L Hyde, Gregory R  
680 Warnes, Francisco J Gómez Pérez, Kelly A Frazer, Paul Elliott, James Scott, et al. Genome-wide scan  
681 identifies variation in mx1pl associated with plasma triglycerides. Nature genetics, 40(2):149, 2008.



- 682 [36] Sekar Kathiresan, Cristen J Willer, Gina M Peloso, Serkalem Demissie, Kiran Musunuru, Eric E Schadt,  
683 Lee Kaplan, Derrick Bennett, Yun Li, Toshiko Tanaka, et al. Common variants at 30 loci contribute to  
684 polygenic dyslipidemia. Nature genetics, 41(1):56–65, 2009.
- 685 [37] Maria Keller, Dorit Schleinitz, Julia Förster, Anke Tönjes, Yvonne Böttcher, Antje Fischer-Rosinsky,  
686 Jana Breitfeld, Kerstin Weidle, Nigel W Rayner, Ralph Burkhardt, et al. Thoc5: a novel gene involved  
687 in hdl-cholesterol metabolism. Journal of lipid research, 54(11):3170–3176, 2013.
- 688 [38] Richa Saxena, Benjamin F Voight, Valeriya Lyssenko, Noël P Burt, Paul IW de Bakker, Hong Chen,  
689 Jeffrey J Roix, Sekar Kathiresan, Joel N Hirschhorn, Mark J Daly, et al. Genome-wide association  
690 analysis identifies loci for type 2 diabetes and triglyceride levels. Science, 316(5829):1331–1336, 2007.
- 691 [39] Yurii S Aulchenko, Samuli Ripatti, Ida Lindqvist, Dorret Boomsma, Iris M Heid, Peter P Pramstaller,  
692 Brenda WJH Penninx, A Cecile JW Janssens, James F Wilson, Tim Spector, et al. Loci influencing  
693 lipid levels and coronary heart disease risk in 16 european population cohorts. Nature genetics, 41(1):  
694 47, 2009.
- 695 [40] Rubina Tabassum, Joel T Rämö, Pietari Ripatti, Jukka T Koskela, Mitja Kurki, Juha Karjalainen, Priit  
696 Palta, Shabbeer Hassan, Javier Nunez-Fontarnau, Tuomo TJ Kiiskinen, et al. Genetic architecture of  
697 human plasma lipidome and its link to cardiovascular disease. Nature communications, 10(1):1–14,  
698 2019.
- 699 [41] Liang He, Yelena Kernogitski, Irina Kulminskaya, Yury Loika, Konstantin G Arbeev, Elena Loiko,  
700 Olivia Bagley, Matt Duan, Arseniy Yashkin, Svetlana V Ukraintseva, et al. Pleiotropic meta-analyses  
701 of longitudinal studies discover novel genetic variants associated with age-related diseases. Frontiers in  
702 genetics, 7:179, 2016.
- 703 [42] Derek Klarin, Scott M Damrauer, Kelly Cho, Yan V Sun, Tanya M Teslovich, Jacqueline Honerlaw,  
704 David R Gagnon, Scott L DuVall, Jin Li, Gina M Peloso, et al. Genetics of blood lipids among ~ 300,000  
705 multi-ethnic participants of the million veteran program. Nature genetics, 50(11):1514–1523, 2018.
- 706 [43] Dawn M Waterworth, Sally L Ricketts, Kijoung Song, Li Chen, Jing Hua Zhao, Samuli Ripatti, Yurii S  
707 Aulchenko, Weihua Zhang, Xin Yuan, Noha Lim, et al. Genetic variants influencing circulating lipid  
708 levels and risk of coronary artery disease. Arteriosclerosis, thrombosis, and vascular biology, 30(11):  
709 2264–2276, 2010.
- 710 [44] Gina M Peloso, Paul L Auer, Joshua C Bis, Arend Voorman, Alanna C Morrison, Nathan O Stitzel,  
711 Jennifer A Brody, Sumeet A Khetarpal, Jacy R Crosby, Myriam Fornage, et al. Association of low-

712 frequency and rare coding-sequence variants with blood lipids and coronary heart disease in 56,000  
713 whites and blacks. The American Journal of Human Genetics, 94(2):223–232, 2014.

714 [45] Tuomas O Kilpeläinen, Amy R Bentley, Raymond Noordam, Yun Ju Sung, Karen Schwander,  
715 Thomas W Winkler, Hermina Jakupović, Daniel I Chasman, Alisa Manning, Ioanna Ntalla, et al.  
716 Multi-ancestry study of blood lipid levels identifies four loci interacting with physical activity. Nature  
717 communications, 10(1):1–11, 2019.

718 [46] Yoichiro Kamatani, Koichi Matsuda, Yukinori Okada, Michiaki Kubo, Naoya Hosono, Yataro Daigo,  
719 Yusuke Nakamura, and Naoyuki Kamatani. Genome-wide association study of hematological and bio-  
720 chemical traits in a japanese population. Nature genetics, 42(3):210, 2010.

721 [47] Marc A Coram, Qing Duan, Thomas J Hoffmann, Timothy Thornton, Joshua W Knowles, Nicholas A  
722 Johnson, Heather M Ochs-Balcom, Timothy A Donlon, Lisa W Martin, Charles B Eaton, et al. Genome-  
723 wide characterization of shared and distinct genetic components that influence blood lipid levels in  
724 ethnically diverse human populations. The American Journal of Human Genetics, 92(6):904–916, 2013.

725 [48] Deepti Gurdasani, Tommy Carstensen, Segun Fatumo, Guanjie Chen, Chris S Franklin, Javier Prado-  
726 Martinez, Heleen Bouman, Federico Abascal, Marc Haber, Ioanna Tachmazidou, et al. Uganda genome  
727 resource enables insights into population history and genomic discovery in africa. Cell, 179(4):984–1002,  
728 2019.

729 [49] Elisabeth M van Leeuwen, Aniko Sabo, Joshua C Bis, Jennifer E Huffman, Ani Manichaikul, Albert V  
730 Smith, Mary F Feitosa, Serkalem Demissie, Peter K Joshi, Qing Duan, et al. Meta-analysis of 49  
731 549 individuals imputed with the 1000 genomes project reveals an exonic damaging variant in angptl4  
732 determining fasting tg levels. Journal of medical genetics, 53(7):441–449, 2016.

733 [50] Matthew A Reyna, Mark DM Leiserson, and Benjamin J Raphael. Hierarchical hotnet: identifying  
734 hierarchies of altered subnetworks. Bioinformatics, 34(17):i972–i980, 2018.

735 [51] Christoph Heiring, Björn Dahlbäck, and Yves A Muller. Ligand recognition and homophilic interactions  
736 in tyro3 structural insights into the axl/tyro3 receptor tyrosine kinase family. Journal of Biological  
737 Chemistry, 279(8):6952–6958, 2004.

738 [52] Alice B Popejoy and Stephanie M Fullerton. Genomics is failing on diversity. Nature News, 538(7624):  
739 161, 2016.

- 740 [53] Wei Cheng, Sohini Ramachandran, and Lorin Crawford. Estimation of non-null snp effect size distribu-  
741 tions enables the detection of enriched genes underlying complex traits. PLoS genetics, 16(6):e1008855,  
742 2020.
- 743 [54] Xiang Zhu and Matthew Stephens. Bayesian large-scale multiple regression with summary statistics  
744 from genome-wide association studies. The annals of applied statistics, 11(3):1561, 2017.
- 745 [55] Michael C Wu, Seunggeun Lee, Tianxi Cai, Yun Li, Michael Boehnke, and Xihong Lin. Rare-variant  
746 association testing for sequencing data with the sequence kernel association test. The American Journal  
747 of Human Genetics, 89(1):82–93, 2011.
- 748 [56] Jake R Conway, Alexander Lex, and Nils Gehlenborg. Upsetr: an r package for the visualization of  
749 intersecting sets and their properties. Bioinformatics, 33(18):2938–2940, 2017.
- 750 [57] Antonio Fabregat, Konstantinos Sidiropoulos, Phani Garapati, Marc Gillespie, Kerstin Hausmann,  
751 Robin Haw, Bijay Jassal, Steven Jupe, Florian Korninger, Sheldon McKay, et al. The reactome pathway  
752 knowledgebase. Nucleic acids research, 44(D1):D481–D487, 2016.
- 753 [58] Sabry Razick, George Magklaras, and Ian M Donaldson. irefindex: a consolidated protein interaction  
754 database with provenance. BMC bioinformatics, 9(1):405, 2008.
- 755 [59] Masahiro Kanai, Masato Akiyama, Atsushi Takahashi, Nana Matoba, Yukihide Momozawa, Masashi  
756 Ikeda, Nakao Iwata, Shiro Ikegawa, Makoto Hirata, Koichi Matsuda, et al. Genetic analysis of quanti-  
757 tative traits in the japanese population links cell types to complex human diseases. Nature genetics, 50  
758 (3):390–400, 2018.
- 759 [60] Masato Akiyama, Yukinori Okada, Masahiro Kanai, Atsushi Takahashi, Yukihide Momozawa, Masashi  
760 Ikeda, Nakao Iwata, Shiro Ikegawa, Makoto Hirata, Koichi Matsuda, et al. Genome-wide association  
761 study identifies 112 new loci for body mass index in the japanese population. Nature genetics, 49(10):  
762 1458, 2017.
- 763 [61] Masato Akiyama, Kazuyoshi Ishigaki, Saori Sakaue, Yukihide Momozawa, Momoko Horikoshi, Makoto  
764 Hirata, Koichi Matsuda, Shiro Ikegawa, Atsushi Takahashi, Masahiro Kanai, et al. Characterizing rare  
765 and low-frequency height-associated variants in the japanese population. Nature communications, 10  
766 (1):1–11, 2019.
- 767 [62] Alexander Gusev, Arthur Ko, Huwenbo Shi, Gaurav Bhatia, Wonil Chung, Brenda WJH Penninx, Rick  
768 Jansen, Eco JC De Geus, Dorret I Boomsma, Fred A Wright, et al. Integrative approaches for large-scale  
769 transcriptome-wide association studies. Nature genetics, 48(3):245, 2016.

- 770 [63] Pak C Sham and Shaun M Purcell. Statistical power and significance testing in large-scale genetic  
771 studies. Nature Reviews Genetics, 15(5):335–346, 2014.
- 772 [64] Huwenbo Shi, Kathryn S Burch, Ruth Johnson, Malika K Freund, Gleb Kichaev, Nicholas Mancuso,  
773 Astrid M Manuel, Natalie Dong, and Bogdan Pasaniuc. Localizing components of shared transethnic  
774 genetic architecture of complex traits from gwas summary data. The American Journal of Human  
775 Genetics, 106(6):805–817, 2020.
- 776 [65] Gao Wang, Abhishek Sarkar, Peter Carbonetto, and Matthew Stephens. A simple new approach to  
777 variable selection in regression, with application to genetic fine mapping. Journal of the Royal Statistical  
778 Society: Series B (Statistical Methodology), 82(5):1273–1300, 2020.
- 779 [66] David H Alexander, John Novembre, and Kenneth Lange. Fast model-based estimation of ancestry in  
780 unrelated individuals. Genome research, 19(9):1655–1664, 2009.
- 781 [67] Christopher C Chang, Carson C Chow, Laurent CAM Tellier, Shashaank Vattikuti, Shaun M Pur-  
782 cell, and James J Lee. Second-generation plink: rising to the challenge of larger and richer datasets.  
783 Gigascience, 4(1):s13742–015, 2015.
- 784 [68] Akiko Nagai, Makoto Hirata, Yoichiro Kamatani, Kaori Muto, Koichi Matsuda, Yutaka Kiyohara,  
785 Toshiharu Ninomiya, Akiko Tamakoshi, Zentaro Yamagata, Taisei Mushiroda, et al. Overview of the  
786 biobank japan project: study design and profile. Journal of epidemiology, 27(Supplement.III):S2–S8,  
787 2017.
- 788 [69] Genevieve L Wojcik, Mariaelisa Graff, Katherine K Nishimura, Ran Tao, Jeffrey Haessler, Christopher R  
789 Gignoux, Heather M Highland, Yesha M Patel, Elena P Sorokin, Christy L Avery, et al. Genetic analyses  
790 of diverse populations improves discovery for complex traits. Nature, 570(7762):514–518, 2019.
- 791 [70] Peter H Sudmant, Tobias Rausch, Eugene J Gardner, Robert E Handsaker, Alexej Abyzov, John Hud-  
792 dleston, Yan Zhang, Kai Ye, Goo Jun, Markus Hsi-Yang Fritz, et al. An integrated map of structural  
793 variation in 2,504 human genomes. Nature, 526(7571):75–81, 2015.
- 794 [71] Anders Bergström, Shane A McCarthy, Ruoyun Hui, Mohamed A Almarri, Qasim Ayub, Petr Danecek,  
795 Yuan Chen, Sabine Felkel, Pille Hallast, Jack Kamm, et al. Insights into human genetic variation and  
796 population history from 929 diverse genomes. Science, 367(6484), 2020.
- 797 [72] Huwenbo Shi, Steven Gazal, Masahiro Kanai, Evan M Koch, Armin P Schoech, Katherine M Siewert,  
798 Samuel S Kim, Yang Luo, Tiffany Amariuta, Hailiang Huang, et al. Population-specific causal disease

- 799 effect sizes in functionally important regions impacted by selection. Nature Communications, 12(1):  
800 1–15, 2021.
- 801 [73] Iain Mathieson. The omnigenic model and polygenic prediction of complex traits. The American Journal  
802 of Human Genetics, 2021.
- 803 [74] Matthew Stephens. False discovery rates: a new deal. Biostatistics, 18(2):275–294, 2017.
- 804 [75] Sarah M Uebachs, Gao Wang, Peter Carbonetto, and Matthew Stephens. Flexible statistical methods  
805 for estimating and testing effects in genomic studies with multiple conditions. Nature genetics, 51(1):  
806 187–195, 2019.
- 807 [76] Farhad Hormozdiari, Emrah Kostem, Eun Yong Kang, Bogdan Pasaniuc, and Eleazar Eskin. Identifying  
808 causal variants at loci with multiple signals of association. Genetics, 198(2):497–508, 2014.
- 809 [77] Alicia R Martin, Meng Lin, Julie M Granka, Justin W Myrick, Xiaomin Liu, Alexandra Sockell, Eliza-  
810 beth G Atkinson, Cedric J Werely, Marlo Möller, Manjinder S Sandhu, et al. An unexpectedly complex  
811 architecture for skin pigmentation in africans. Cell, 171(6):1340–1353, 2017.
- 812 [78] Peter Carbonetto and Matthew Stephens. Integrated enrichment analysis of variants and pathways in  
813 genome-wide association studies indicates central role for il-2 signaling genes in type 1 diabetes, and  
814 cytokine signaling genes in crohn’s disease. PLoS genetics, 9(10):e1003770, 2013.
- 815 [79] Xiang Zhu and Matthew Stephens. Large-scale genome-wide enrichment analyses identify new trait-  
816 associated genes and pathways across 31 human phenotypes. Nature communications, 9(1):1–14, 2018.
- 817 [80] Michael C Wu, Peter Kraft, Michael P Epstein, Deanne M Taylor, Stephen J Chanock, David J Hunter,  
818 and Xihong Lin. Powerful snp-set analysis for case-control genome-wide association studies. The  
819 American Journal of Human Genetics, 86(6):929–942, 2010.
- 820 [81] Seunggeun Lee, Mary J Emond, Michael J Bamshad, Kathleen C Barnes, Mark J Rieder, Deborah A  
821 Nickerson, ESP Lung Project Team, David C Christiani, Mark M Wurfel, Xihong Lin, et al. Optimal  
822 unified approach for rare-variant association testing with application to small-sample case-control whole-  
823 exome sequencing studies. The American Journal of Human Genetics, 91(2):224–237, 2012.
- 824 [82] Iuliana Ionita-Laza, Seunggeun Lee, Vlad Makarov, Joseph D Buxbaum, and Xihong Lin. Sequence  
825 kernel association tests for the combined effect of rare and common variants. The American Journal of  
826 Human Genetics, 92(6):841–853, 2013.

- 827 [83] Melissa R McGuirl, Samuel Pattillo Smith, Björn Sandstede, and Sohini Ramachandran. Detecting  
828 shared genetic architecture among multiple phenotypes by hierarchical clustering of gene-level associa-  
829 tion statistics. Genetics, 2020.
- 830 [84] Lorin Crawford, Ping Zeng, Sayan Mukherjee, and Xiang Zhou. Detecting epistasis with the marginal  
831 epistasis test in genetic mapping studies of quantitative traits. PLoS genetics, 13(7):e1006869, 2017.
- 832 [85] Maria Maddalena Barbieri, James O Berger, et al. Optimal predictive model selection. The annals of  
833 statistics, 32(3):870–897, 2004.
